# Supplementary material for: Fire blight disease reactome: RNA-seq transcriptional profile of apple host plant defense responses to Erwinia amylovora pathogen infection
Source: PubMed Central journal article supplement (PMC4756370; doi:10.1038/srep21600), 2016-02-17
Supplement: srep21600-s1.pdf [file srep21600-s1.pdf]

## Supplementary Material

belonging to:

### **Fire blight disease reactome: RNA-seq transcriptional profile of apple host plant defense responses to *Erwinia amylovora* pathogen infection**

Tim Kamber, Jan P. Buchmann, Joël F. Pothier, Theo H.M. Smits, Thomas Wicker & Brion Duffy

Supplemental table 1: Descriptions of the significantly differentially expressed *M. x domestica* transcripts in response to fire blight infection.

Supplemental table 2: BLASTx results of the significantly differentially expressed novel ORFs in *M. x domestica* in response to fire blight infection.

Supplemental table 3: BLASTx results of all expressed (non-significant) novel ORFs in *M. x domestica*.

Supplementary Table 1 Descriptions of the significantly differentially expressed *M. x domestica* transcripts in response to fire blight infection.

| <i>M. x domestica</i> accession | <i>M. x domestica</i> locus | log <sub>2</sub> (fold change) | <i>A. thaliana</i> accession | Name                          | Description                                                                                            |
|---------------------------------|-----------------------------|--------------------------------|------------------------------|-------------------------------|--------------------------------------------------------------------------------------------------------|
| MDP000075648                    | MDC000011.378:18806-16970   | 1.79769e+308                   | AT5G46630.1                  |                               | Claithrin adaptor complexes medium subunit family protein                                              |
| MDP000026805                    | MDC000020.209:8435-13377    | -4.53718                       | AT1G23990.1                  |                               | Protein of unknown function, DUF642                                                                    |
| 0                               | MDC000127.652:4251-4037     | 1.79769e+308                   | AT4G32370.1                  |                               | CAMP (CAMP-rich secretory proteins, Antigen 5, and Pathogenesis-related 1 protein) superfamily protein |
| MDP0000163276                   | MDC000130.277:7155-7601     | 2.19171                        | AT5G43380.1                  | TOPP6                         | type one serine/threonine protein phosphatase 6                                                        |
| MDP0000659818                   | MDC000144.408:251-3627      | 1.79769e+308                   | AT2G39200.1                  | ATMLO12,MLO12                 | Seven transmembrane MLO family protein                                                                 |
| MDP0000417927                   | MDC000149.326:14929-15724   | -1.93472                       | AT2G34430.1                  | LHB1B1,LHCB1.4                | light-harvesting chlorophyll-protein complex II subunit B1                                             |
| MDP0000417929                   | MDC000149.326:17749-18547   | -1.87154                       | AT2G34430.1                  | LHB1B1,LHCB1.4                | light-harvesting chlorophyll-protein complex II subunit B1                                             |
| MDP0000251575                   | MDC000149.357:271-1869      | -1.87058                       | AT2G34430.1                  | LHB1B1,LHCB1.4                | light-harvesting chlorophyll-protein complex II subunit B1                                             |
| MDP0000251575                   | MDC000149.357:3094-3889     | -1.80257                       | AT2G34430.1                  | LHB1B1,LHCB1.4                | light-harvesting chlorophyll-protein complex II subunit B1                                             |
| MDP0000265831                   | MDC000164.370:18851-32386   | 2.71647                        | AT5G41770.1                  |                               | crooked neck protein, putative / cell cycle protein, putative                                          |
| MDP0000161380                   | MDC000178.398:6450-13590    | 1.79769e+308                   | AT5G19485.1                  |                               | transferases,nucleotidyltransferases                                                                   |
| MDP0000256732                   | MDC00021.1.300:6961-7241    | 1.79769e+308                   | AT2G18290.1                  | APC10                         | anaphase promoting complex 10                                                                          |
| MDP0000255157                   | MDC000270.326:10391-13689   | 1.79769e+308                   | AT4G21430.1                  | B160                          | Zinc finger, RING-type;Transcription factor Ijumoni/ispaspartyl beta-hydroxylase                       |
| 0                               | MDC000319.348:8176-8367     | -2.48801                       |                              |                               |                                                                                                        |
| MDP0000265100                   | MDC000357.185:21423-36365   | 2.72442                        | AT5G23760.1                  |                               | Copper transport protein family                                                                        |
| MDP0000264101                   | MDC000368.238:2725-8711     | 1.79769e+308                   | AT4G05410.1                  | YAO                           | Transducin/WD40 repeat-like superfamily protein                                                        |
| 0                               | MDC000416.247:30134-30295   | 1.79769e+308                   |                              |                               |                                                                                                        |
| 0                               | MDC000446.497:2813-3451     | 2.36105                        | AT3G19815.1                  |                               | unknown protein                                                                                        |
| 0                               | MDC000455.144:3026-3468     | 3.21257                        | AT4G24620.1                  | PGI1, PGI                     | phosphoglucose isomerase 1                                                                             |
| MDP0000323652                   | MDC000503.259:1794-2875     | 2.4077                         |                              |                               |                                                                                                        |
| MDP0000263664                   | MDC000567.258:7588-8550     | -2.52714                       | AT4G25040.1                  |                               | Uncharacterised protein family (UPF0497)                                                               |
| MDP0000309167                   | MDC000600.439:7351-10850    | 1.79769e+308                   | AT2G45220.1                  |                               | Plant invertase/spectrin methyltransferase inhibitor superfamily                                       |
| MDP0000134686                   | MDC000618.305:5859-5889     | 1.79769e+308                   | AT1G62300.1                  |                               | Tetratricopeptide repeat (TPR)-like superfamily protein                                                |
| MDP0000146621                   | MDC000636.590:1152-4139     | 1.79769e+308                   | AT5G20080.1                  |                               | FAD/NAD(P)-binding oxidoreductase                                                                      |
| MDP0000413403                   | MDC000636.613:20700-20894   | 1.79769e+308                   | AT1G80160.1                  |                               | Lactoylglutathione lyase / glyoxalase I family protein                                                 |
| MDP0000256199                   | MDC000662.202:27328-27666   | 1.79769e+308                   | AT3G63440.1                  | ATCKX6,ATCKX7,CKX6            | cytokinin oxidase/dehydrogenase 6                                                                      |
| MDP0000268130                   | MDC000665.201:7077-7269     | 1.79769e+308                   | AT1G50960.1                  |                               | RNA-binding KH domain-containing protein                                                               |
| MDP0000262910                   | MDC000703.400:1546-15862    | 1.79769e+308                   | AT3G63440.1                  |                               | dehydratase family                                                                                     |
| MDP0000253454                   | MDC000704.27:983-1106       | 1.79769e+308                   | AT5G47202.2                  |                               | Thioesterase family protein                                                                            |
| 0                               | MDC000706.497:11518-11660   | 1.79769e+308                   |                              |                               |                                                                                                        |
| MDP0000903417                   | MDC000706.499:3489-5017     | 1.79769e+308                   | AT1G61560.1                  | ATMLO6,MLO6                   | Seven transmembrane MLO family protein                                                                 |
| MDP0000119183                   | MDC000707.178:3071-3361     | 1.79769e+308                   | AT5G13330.1                  |                               | FtsJ-like methyltransferase family protein                                                             |
| MDP0000757070                   | MDC000711.381:8991-9419     | -2.27797                       | AT5G38760.1                  |                               | Late embryogenesis abundant protein (LEA) family protein                                               |
| MDP0000119262                   | MDC000769.371:851-2301      | 1.70216                        | AT3G26430.1                  |                               | GDSL-like Lipase/Acylhydrolase superfamily protein                                                     |
| MDP0000256865                   | MDC000791.288:5104-7135     | 1.79769e+308                   | AT4G10490.1                  |                               | 2-oxoglutarate (2OG) and Fe(II)-dependent oxygenase superfamily protein                                |
| MDP0000265644                   | MDC000810.342:26666-27910   | 1.79769e+308                   | AT1G52800.1                  |                               | 2-oxoglutarate (2OG) and Fe(II)-dependent oxygenase superfamily protein                                |
| MDP0000254592                   | MDC000841.262:2491-1127     | 4.28911                        | AT2G29260.1                  | ATBCB,BCB,SAG14               | blue-copper-binding protein                                                                            |
| MDP0000268271                   | MDC000866.255:10198-10455   | 1.79769e+308                   | AT1G31930.1                  | XLG3                          | extra-large GTP-binding protein 3                                                                      |
| MDP0000264034                   | MDC000886.330:32493-36293   | 1.79769e+308                   | AT4G03180.1                  |                               | 2-oxoglutarate (2OG) and Fe(II)-dependent oxygenase superfamily protein                                |
| MDP0000503940                   | MDC000913.267:2796-29046    | 2.37597                        | AT3G11180.1                  |                               | 2-oxoglutarate (2OG) and Fe(II)-dependent oxygenase superfamily protein                                |
| MDP0000361449                   | MDC000929.184:1888-3055     | -3.06288                       | UGT88A1                      | UGT88A1                       | UDP-glucosyl transferase 88A1                                                                          |
| MDP0000252862                   | MDC000929.235:4941-5369     | -3.05027                       | UGT88A1                      | UGT88A1                       | UDP-glucosyl transferase 88A1                                                                          |
| MDP0000466313                   | MDC001071.282:1928-19513    | 1.79769e+308                   | AT3G10760.1                  |                               | Homeodomain-like superfamily protein                                                                   |
| MDP0000134250                   | MDC001204.784:1228-4995     | -1.79053                       | AT1G53280.1                  |                               | Class I glutamine amidotransferase-like superfamily protein                                            |
| MDP0000083538                   | MDC001240.396:9691-9990     | 1.79769e+308                   | AT3G03940.1                  |                               | Protein kinase family protein                                                                          |
| MDP0000159558                   | MDC001261.116:13685-20797   | 1.79769e+308                   | AT4G32160.1                  |                               | Phox (PX) domain-containing protein                                                                    |
| MDP0000255913                   | MDC001262.249:1127-4423     | 1.96231                        | FP51                         | FP51                          | farnesyl diphosphate synthase 1                                                                        |
| MDP0000445218                   | MDC001273.205:845-1730      | 1.79769e+308                   | AT1G02680.1                  | TA1F3                         | TBP-associated factor 13                                                                               |
| MDP0000235782                   | MDC001276.321:32854-33398   | 1.79769e+308                   | AT4G18160.1                  | ATKCO6,ATTPK6,KCO6,TPK3       | Ca <sup>2+</sup> activated outward rectifying K <sup>+</sup> channel 6                                 |
| MDP0000119600                   | MDC001284.344:1341-1621     | 1.79769e+308                   | AT2G45760.1                  | BALBAP2                       | BON association protein 2                                                                              |
| 0                               | MDC001441.272:13692-14163   | 1.79769e+308                   | AT5G43920.1                  |                               | transducin family protein / WD-40 repeat family protein                                                |
| 0                               | MDC001471.424:8307-83619    | 1.79769e+308                   | AT2G29260.1                  |                               | NAD(P)-binding Rossmann-fold superfamily protein                                                       |
| MDP0000527355                   | MDC001500.115:2484-4397     | -1.88554                       | AT1G0850.1                   | ATCTL1,CTL1,ELP,ELP1,ERH2     | Chitinase family protein                                                                               |
| MDP0000706016                   | MDC001647.167:31621-31880   | 1.79769e+308                   | AT1G32360.1                  |                               | Zinc finger (CCHC-type) family protein                                                                 |
| MDP0000498524                   | MDC001659.508:3688-13621    | 1.79769e+308                   | AT1G22380.1                  | AUGT85A3,UGT85A3              | UDP-glucosyl transferase 85A3                                                                          |
| 0                               | MDC001671.165:2805-2973     | 1.79769e+308                   | AT1G78380.1                  | ATGSTU19, GST8, GSTU19        | glutathione S-transferase TAU 19                                                                       |
| MDP0000496027                   | MDC001715.358:1472-1911     | 1.79769e+308                   | AT4G36220.1                  | CYP84A1,FAH1                  | farnic acid 5-hydroxylase 1                                                                            |
| MDP0000268417                   | MDC001733.221:3341-3606     | 1.79769e+308                   | AT3G59200.1                  |                               | F-box/RN1-like superfamily protein                                                                     |
| MDP0000163727                   | MDC001753.378:36916-37587   | 1.79769e+308                   | AT2G15780.1                  |                               | Cupredoxin superfamily protein                                                                         |
| MDP0000159000                   | MDC001757.664:1294-3548     | 3.69176                        | AT3G11180.2                  |                               | 2-oxoglutarate (2OG) and Fe(II)-dependent oxygenase superfamily protein                                |
| MDP0000576922                   | MDC001757.678:208-6183      | 4.517                          | AT2G36950.1                  |                               | 2-oxoglutarate (2OG) and Fe(II)-dependent oxygenase superfamily protein                                |
| MDP0000349381                   | MDC001781.94:3475-6197      | 1.79769e+308                   | AT1G28120.1                  |                               |                                                                                                        |
| MDP0000877084                   | MDC001787.334:3408-3753     | 1.79769e+308                   |                              |                               |                                                                                                        |
| MDP0000265806                   | MDC001831.292:8893-9169     | 2.3957                         |                              |                               |                                                                                                        |
| MDP0000588582                   | MDC001839.110:1393-3069     | -2.34333                       | AT1G68220.1                  |                               | Protein of unknown function (DUF1218)                                                                  |
| MDP0000264961                   | MDC001845.296:622-3441      | 1.79769e+308                   | AT5G26885.1                  |                               | RING-U-box superfamily protein                                                                         |
| MDP0000538338                   | MDC001848.381:1941-3243     | 1.79769e+308                   | MLP423                       | MLP423                        | MLP-like protein 423                                                                                   |
| MDP0000835158                   | MDC001848.391:1325-1805     | 5.13328                        | MLP423                       | MLP423                        | MLP-like protein 423                                                                                   |
| MDP0000835159                   | MDC001848.391:5087-5567     | 4.99847                        | MLP423                       | MLP423                        | MLP-like protein 423                                                                                   |
| 0                               | MDC001867.380:3629-3727     | 1.79769e+308                   |                              |                               |                                                                                                        |
| 0                               | MDC001930.226:2272-2436     | -2.04989                       |                              |                               |                                                                                                        |
| MDP0000607969                   | MDC001963.417:459-4217      | 2.78388                        | AT4G27250.1                  |                               | NAD(P)-binding Rossmann-fold superfamily protein                                                       |
| 0                               | MDC001963.417:4816-4925     | 1.79769e+308                   | AT4G27250.2                  |                               | NAD(P)-binding Rossmann-fold superfamily protein                                                       |
| MDP0000025413                   | MDC001972.273:3026-9072     | 2.43751                        | AT5G27450.1                  | MK,MVK                        | mevalonate kinase                                                                                      |
| MDP0000844719                   | MDC001977.912:3360-3668     | 1.79769e+308                   |                              |                               |                                                                                                        |
| MDP0000267282                   | MDC001999.948:8959-9311     | 1.79769e+308                   | AT1G80400.1                  |                               | RING-U-box superfamily protein                                                                         |
| MDP0000462572                   | MDC002001.729:20293-31469   | 1.71184                        | AT3G53990.1                  |                               | Adenine nucleotide alpha hydrolases-like superfamily protein                                           |
| 0                               | MDC002052.246:9559-9831     | 1.79769e+308                   |                              |                               |                                                                                                        |
| MDP0000829170                   | MDC002090.143:3807-5483     | 1.79769e+308                   | AT5G19440.1                  |                               | NAD(P)-binding Rossmann-fold superfamily protein                                                       |
| MDP0000873573                   | MDC002124.224:10772-12083   | 3.23587                        | AT5G51970.1                  |                               | GroES-like zinc-binding alcohol dehydrogenase family protein                                           |
| MDP0000515106                   | MDC002124.224:5559-6883     | 2.49012                        | AT2G22300.1                  |                               | GroES-like zinc-binding alcohol dehydrogenase family protein                                           |
| MDP0000707567                   | MDC002124.226:5571-6882     | 2.42596                        | AT5G51970.1                  |                               | GroES-like zinc-binding alcohol dehydrogenase family protein                                           |
| MDP0000120175                   | MDC002136.624:799-1408      | 1.79769e+308                   | AT1G68760.1                  | ATNUDT1,ATNUDX1,NUDX1         | nucleix zinc-binding 1                                                                                 |
| 0                               | MDC002136.660:2651-2671     | 4.09695                        |                              |                               |                                                                                                        |
| 0                               | MDC002149.751:1345-1407     | 1.79769e+308                   |                              |                               |                                                                                                        |
| 0                               | MDC002149.751:2007-2430     | 2.48827                        |                              |                               |                                                                                                        |
| 0                               | MDC002218.355:6778-7176     | 1.79769e+308                   |                              |                               |                                                                                                        |
| 0                               | MDC002270.126:3680-3863     | 1.79769e+308                   |                              |                               |                                                                                                        |
| MDP0000163984                   | MDC002285.447:6979-7069     | 1.79769e+308                   | AT4G18530.1                  |                               | Protein of unknown function (DUF707)                                                                   |
| MDP0000157186                   | MDC002285.478:30843-31155   | 1.79769e+308                   | AT4G16444.1                  |                               |                                                                                                        |
| MDP0000268136                   | MDC002304.132:819-8300      | -2.53248                       | AT1G24290.1                  |                               | Bromocyclase T2 family protein                                                                         |
| MDP0000457389                   | MDC002306.103:1840-2063     | 1.79769e+308                   | AT5G53550.1                  | WNK4,ZIK2                     | with no lysine (K) kinase 4                                                                            |
| 0                               | MDC002322.251:26803-27928   | 4.81002                        | AT4G11280.1                  | ACS6, ATACS6                  | 1-aminocyclopropane-1-carboxylic acid (acc) synthase 6                                                 |
| MDP00008307051                  | MDC002335.203:3094-5164     | 1.79769e+308                   | AT1G50430.1                  | 7RED,DWF5,LE,PA,STR           | Ergosterol biosynthesis ERG4/ERG24 family                                                              |
| 0                               | MDC002385.280:8975-9237     | 1.79769e+308                   |                              |                               |                                                                                                        |
| MDP0000165382                   | MDC002388.638:6965-12223    | 1.79769e+308                   | AT2G41770.1                  |                               | Protein of unknown function (DUF288)                                                                   |
| MDP0000268597                   | MDC002412.301:3820-15392    | 1.79769e+308                   | AT5G27640.1                  | ATEIF3B-1,ATTIF3B1,EIF3B,EIF3 | translation initiation factor 3B1                                                                      |
| MDP0000164286                   | MDC002413.411:10891-11713   | -2.76725                       | AT5G14920.1                  |                               | Gibberellin-regulated family protein                                                                   |
| MDP0000269551                   | MDC002413.411:4634-4664     | 1.79769e+308                   | AT5G14920.1                  |                               | Gibberellin-regulated family protein                                                                   |
| 0                               | MDC002431.300:11772-11965   | 1.79769e+308                   | AT5G19130.2                  |                               | GP1 transamidase component family protein / Gaa1-like family protein                                   |
| MDP0000263630                   | MDC002446.247:7797-8476     | 1.79769e+308                   | AT3G05950.1                  |                               | R2M-like cupins superfamily protein                                                                    |
| MDP0000830377                   | MDC002505.371:15860-16380   | 1.79769e+308                   | AT1G63700.1                  | EMB71,MAPKKK4,YDA             | Protein kinase superfamily protein                                                                     |
| MDP0000897416                   | MDC002555.575:20823-21885   | 1.80749                        |                              |                               |                                                                                                        |
| MDP0000602070                   | MDC002587.522:8090-8266     | 1.79769e+308                   | AT5G04620.2                  | ATBIOF,BIOF                   | biotin F                                                                                               |
| MDP0000525437                   | MDC002618.102:55-788        | 1.79769e+308                   | AT1G20760.1                  |                               | Calcium-binding EF hand family protein                                                                 |
| MDP0000268136                   | MDC002693.97:512-884        | 1.79769e+308                   | CAMTA3,SR1                   | CAMTA3,SR1                    | signal responsive 1                                                                                    |
| MDP0000236536                   | MDC002765.351:2478-6149     | 2.51354                        | MLP423                       | MLP423                        | MLP-like protein 423                                                                                   |
| MDP0000155698                   | MDC002771.491:4020-6869     | -2.80764                       | AT3G25150.2                  |                               | Nuclear transport factor 2 (NTF2) family protein with RNA binding (RRM-RBD-RNP motifs) domain          |
| MDP0000699497                   | MDC002791.491:4020-6869     | -1.94137                       | AT4G25150.1                  |                               | HAD superfamily, subfamily IIIB acid phosphatase                                                       |
| 0                               | MDC002799.293:2023-2423     | 2.25333                        |                              |                               |                                                                                                        |
| MDP0000361511                   | MDC002827.323:10419-11049   | -3.81975                       | AT2G29330.1                  | TRI                           | trypinone reductase                                                                                    |
| MDP0000788170                   | MDC002892.343:26056-27195   | 3.94434                        | AT1G78780.1                  |                               | Bifunctional inhibitor/lipid-transfer protein/seed storage 2S albumin superfamily protein              |
| MDP0000236618                   | MDC002931.100:11631-11924   | 1.79769e+308                   | AT3G12345.1                  |                               | pathogenesis-related family protein                                                                    |
| MDP0000173465                   | MDC002987.519:16454-16916   | 2.88122                        | AT4G38240.1                  | CGL,CGL1,GNT1                 | alpha-1,3-mannosyl-glycoprotein beta-1,2-N-acetylglucosaminyltransferase, putative                     |
| MDP0000885511                   | MDC002975.216:22992-23382   | 2.46891                        | SIB1                         | SIB1                          | sigma factor binding protein 1                                                                         |
| MDP0000167437                   | MDC003038.458:3026-3383     | 1.79769e+308                   | AT2G33580.1                  |                               | Protein kinase superfamily protein                                                                     |
| MDP0000120758                   | MDC003093.180:517-1215      | 2.722                          | AT4G25370.1                  |                               | Double Clip-N motif protein                                                                            |
| MDP0000146334                   | MDC003164.614:3761-6028     | -2.65594                       | AT2G45960.2                  | ATHH2,PIP1.2,PIP1B,TMP-A      |                                                                                                        |

|               |                           |              |             |                               |                                                                           |
|---------------|---------------------------|--------------|-------------|-------------------------------|---------------------------------------------------------------------------|
| MDP0000170501 | MDC003661.18559137-59369  | 1.79769e+308 | AT1G03370.1 |                               | C2 calcium/lipid-binding and GRAM domain containing protein               |
| MDP0000680997 | MDC003670.313733-3535     | 1.79769e+308 | AT1G77120.1 | ADH,ADH1,ATADH,ATADH1         | alcohol dehydrogenase 1                                                   |
| MDP0000147293 | MDC003688.1911671-3161    | 2.53723      | AT4G34100.1 |                               | RING-U-box superfamily protein                                            |
| 0             | MDC003716.30646958-47066  | 1.79769e+308 | AT1G03260.1 |                               | SNARE associated Golgi protein family                                     |
| 0             | MDC003741.3862311-2600    | 1.79769e+308 |             |                               |                                                                           |
| MDP0000391319 | MDC003758.191289-1601     | 3.01485      | AT5G04550.1 |                               | Protein of unknown function (DUF668)                                      |
| 0             | MDC003761.2403013-3454    | 2.52991      |             |                               |                                                                           |
| MDP0000276506 | MDC003761.2407197-17791   | 4.45347      |             |                               |                                                                           |
| MDP0000411166 | MDC003788.2905474-5635    | 1.79769e+308 | AT2G38800.1 |                               | Plant calmodulin-binding protein-related                                  |
| MDP0000276278 | MDC003807.2211401-12233   | 1.79769e+308 | AT4G22600.1 | ANAC073, NAC073, SND2         | NAC domain containing protein 73                                          |
| MDP0000787808 | MDC003810.27215817-16803  | 1.79769e+308 | AT4G12350.1 | AIMYB42, MYB42                | myb domain protein 42                                                     |
| MDP0000273012 | MDC003865.5628097-8515    | 1.79769e+308 | AT3G54040.1 |                               | PAR1 protein                                                              |
| MDP0000167303 | MDC003919.3553369-5166    | -1.74607     | AT1G01780.1 |                               | GATA type zinc finger transcription factor family protein                 |
| MDP0000171644 | MDC003962.2975407-5482    | 1.79769e+308 | AT5G6900.1  |                               | Disease resistance protein (CC-NBS-LRR class) family                      |
| MDP0000237113 | MDC004009.5594720-15084   | 1.79769e+308 | AT3G18290.1 | BTS, EMB2454                  | zinc finger protein-related                                               |
| MDP0000854767 | MDC004013.428929-2727     | 1.79769e+308 | AT3G12270.1 | ATPRMT3, PRMT3                | protein arginine methyltransferase 3                                      |
| 0             | MDC004047.2064467-4494    | 1.79769e+308 |             |                               |                                                                           |
| MDP0000830926 | MDC004049.5161567-2569    | 2.10525      | AT5G16080.1 | AICXE17, CXE17                | carboxyesterase 17                                                        |
| 0             | MDC004050.1112970-3698    | 2.97995      |             |                               |                                                                           |
| 0             | MDC004050.1113000-6340    | 1.79769e+308 |             |                               |                                                                           |
| MDP0000169311 | MDC004066.3572616-11039   | 1.79769e+308 | AT3G45140.1 | ATLX2, LOX2                   | lipoxenase 2                                                              |
| MDP0000135837 | MDC004095.241944-5617     | 1.60314      | AT1G60140.1 | ATTPS10, TPS10                | threonase phosphate synthase                                              |
| 0             | MDC004097.2328798-9675    | 3.40094      | AT2G46150.1 |                               | Late embryogenesis abundant (LEA) hydroxyproline-rich glycoprotein family |
| 0             | MDC004133.3363038-8299    | 1.79769e+308 |             |                               |                                                                           |
| MDP0000564592 | MDC004154.3511246-12323   | 1.79769e+308 | AT5G13180.1 | ANAC083, NAC083, VNI2         | NAC domain containing protein 83                                          |
| MDP0000487384 | MDC004165.256209-4204     | -1.8127      | AT5G23860.1 | TUB8                          | tubulin beta 8                                                            |
| MDP0000155233 | MDC004175.40324292-27127  | -2.1379      | AT1G75060.1 |                               |                                                                           |
| MDP0000951190 | MDC004175.4036190-7715    | 1.79769e+308 | AT5G24620.1 |                               | Protein of unknown function (DUF607)                                      |
| MDP0000147913 | MDC004193.2262439-4271    | 1.79769e+308 | AT4G10910.1 |                               | 2-oxoalotaurin (2OG) and Fe(II)-dependent oxygenase superfamily protein   |
| MDP0000168767 | MDC004225.3541055-10850   | 1.79769e+308 |             |                               |                                                                           |
| MDP0000174018 | MDC004233.45720199-20679  | 2.2613       | AT1G24020.1 | MLP423                        | MLP-like protein 423                                                      |
| MDP0000864747 | MDC004233.4576800-7280    | 5.22546      | AT1G24020.1 | MLP423                        | MLP-like protein 423                                                      |
| MDP0000864748 | MDC004233.4579098-9578    | 4.01462      | AT1G24020.1 | MLP423                        | MLP-like protein 423                                                      |
| MDP0000175004 | MDC004259.2863936-10513   | 1.79769e+308 |             |                               |                                                                           |
| MDP0000167080 | MDC004293.5501689-8142    | 1.79769e+308 | AT1G14610.1 | TWN2, VALRS                   | valyl-tRNA synthetase / valine-tRNA ligase (VALRS)                        |
| MDP0000167098 | MDC004293.5508967-71109   | 1.79769e+308 | AT5G51970.1 |                               | GroES-like zinc-binding alcohol dehydrogenase family protein              |
| MDP0000913358 | MDC004324.26315880-16063  | 1.79769e+308 | AT5G67630.1 |                               | P-loop containing nucleoside triphosphate hydrolases superfamily protein  |
| MDP0000170316 | MDC004331.37824044-24882  | -2.69079     | AT1G32560.1 |                               | Late embryogenesis abundant protein, group 1 protein                      |
| MDP0000147581 | MDC004374.39919-1173      | 1.79769e+308 | AT5G61820.1 |                               |                                                                           |
| MDP0000167788 | MDC004427.5772224-5046    | -1.95298     | AT1G37630.1 |                               | RING-U-box superfamily protein                                            |
| 0             | MDC004475.20015597-16341  | 5.32451      | AT2G46150.1 |                               | Late embryogenesis abundant (LEA) hydroxyproline-rich glycoprotein family |
| MDP0000137468 | MDC004475.20020541-21775  | 3.67923      | AT2G46150.1 |                               | Late embryogenesis abundant (LEA) hydroxyproline-rich glycoprotein family |
| MDP0000121566 | MDC004513.349138-370      | 1.79769e+308 | AT2G46150.1 |                               | Late embryogenesis abundant (LEA) hydroxyproline-rich glycoprotein family |
| MDP0000065495 | MDC004571.1952433-4815    | 1.79769e+308 | AT5G47080.1 | CKB1                          | casein kinase II beta chain 1                                             |
| MDP0000166057 | MDC004613.228115547-12800 | 1.79769e+308 | AT5G05200.1 |                               | Protein kinase superfamily protein                                        |
| MDP0000170777 | MDC004652.21048970-50473  | 1.79769e+308 | AT5G53045.1 |                               |                                                                           |
| MDP0000166875 | MDC004673.39510875-13759  | -1.9178      | AT2G38170.3 | ATCAX1, CAX1, RC14            | cation exchanger 1                                                        |
| MDP0000249060 | MDC004678.22912725-20215  | 1.79769e+308 | AT3G20640.1 |                               | basic helix-loop-helix (bHLH) DNA-binding superfamily protein             |
| MDP0000162179 | MDC004686.2963969-4432    | 1.79769e+308 | AT5G47910.1 | ATRBOHD, RBOHD                | respiratory burst oxidase homologue D                                     |
| MDP0000237403 | MDC004719.23421812-23054  | 2.25432      | AT5G42570.1 |                               | B-cell receptor-associated 31-like                                        |
| MDP0000557465 | MDC004732.2259663-9840    | 1.79769e+308 | AT2G19730.1 |                               | Ribosomal L28e protein family                                             |
| MDP0000553127 | MDC004757.36310617-19812  | 2.12939      | AT3G51680.1 |                               | NAD(P)-binding Rossmann-fold superfamily protein                          |
| MDP0000168735 | MDC004766.5334405-5962    | 1.79769e+308 | AT5G13930.1 | ATCHS, CHS, TT4               | Chalcone and stilbene synthase family protein                             |
| MDP0000716308 | MDC004766.55211190-11677  | 1.79769e+308 | AT5G13930.1 | ATCHS, CHS, TT4               | Chalcone and stilbene synthase family protein                             |
| MDP0000913661 | MDC004804.3067723-5794    | 1.88294      | AT3G04300.1 |                               | RmC-like cupins superfamily protein                                       |
| 0             | MDC004821.3923939-9512    | 1.79769e+308 |             |                               |                                                                           |
| 0             | MDC004849.513202-284      | 1.79769e+308 |             |                               |                                                                           |
| MDP0000271982 | MDC004885.7934041-27077   | 5.6005       | AT2G39340.1 |                               | SAC3/GANP/Nin1/mts3/elf-3 p25 family                                      |
| 0             | MDC004932.32815182-15442  | 1.79769e+308 |             |                               |                                                                           |
| MDP0000136847 | MDC004932.32823136-23429  | 1.79769e+308 | AT1G73050.1 |                               | Glucose-methanol-choline (GMC) oxidoreductase family protein              |
| 0             | MDC004932.3292625-30381   | 3.26688      |             |                               |                                                                           |
| MDP0000566117 | MDC004936.1147331-11600   | 2.28845      | AT4G20030.1 |                               | RNA-binding (RRM/RBD/RNP motifs) family protein                           |
| MDP0000170531 | MDC004964.4703884-8230    | 3.33886      | AT1G70520.1 | CRK2                          | cysteine-rich RLK (RECEPTOR-like protein kinase) 2                        |
| MDP0000148973 | MDC004986.3633072-25002   | 1.40037      | AT2G7450.1  |                               | Aluminum induced protein with YGL and LRDR motifs                         |
| MDP0000121897 | MDC005009.620186-9501     | 9.90789      | AT1G27450.1 | APT1, ATAPT1                  | adenine phosphoribosyl transferase 1                                      |
| MDP0000147784 | MDC005054.2495101-5480    | 1.79769e+308 | AT3G59110.1 |                               | Protein kinase superfamily protein                                        |
| MDP0000137705 | MDC005122.1964548-6205    | 2.24         | AT1G78440.1 | ATGA2OX1, GA2OX1              | Arabidopsis thaliana gibberellin 2-oxidase 1                              |
| MDP0000166259 | MDC005168.48310-1556      | 2.00714      | AT2G38740.1 |                               | Halooxid dehalogenase-like hydrolase (HAD) superfamily protein            |
| MDP0000275092 | MDC005168.48310-1556      | 2.00714      | AT2G38740.1 |                               | Halooxid dehalogenase-like hydrolase (HAD) superfamily protein            |
| 0             | MDC005194.2193093-3360    | 1.79769e+308 |             |                               |                                                                           |
| MDP0000658768 | MDC005200.17434013-34414  | 3.23991      | AT1G11090.1 |                               | alpha/beta-Hydrolases superfamily protein                                 |
| MDP0000702868 | MDC005243.3829372-10625   | 2.27364      | AT3G54420.1 | ATCHITIV, ATEP3, CHIV, EP3    | homolog of carrot EP3-3 chitinase                                         |
| 0             | MDC005257.2316448-6485    | 1.79769e+308 |             |                               |                                                                           |
| 0             | MDC005259.535421-4601     | 1.79769e+308 |             |                               |                                                                           |
| MDP0000273224 | MDC005334.309206-8594     | -2.16795     | AT5G53350.1 | CLPX                          | CLP protease regulatory subunit X                                         |
| MDP0000450601 | MDC005362.2406098-12887   | 1.79769e+308 | AT3G11820.2 | AT-SYR1, ATSYR12, ATSYR14     | syntaxin of plants 121                                                    |
| MDP0000169025 | MDC005381.28329450-29871  | 1.79769e+308 | AT1G12775.1 |                               | Pentatricopeptide repeat (PPR) superfamily protein                        |
| MDP0000878615 | MDC005390.3511698-13402   | 1.79769e+308 | AT1G18400.1 | BEE1                          | BR enhanced expression 1                                                  |
| MDP0000235383 | MDC005401.1711389-30232   | 1.79769e+308 | AT1G20110.1 | ATPDX1, ATPDX1.3, PDX1, PDX   | Aldolase-type TIM barrel family protein                                   |
| MDP0000690695 | MDC005410.2034497-7949    | 1.79769e+308 | AT5G18310.1 |                               |                                                                           |
| MDP0000167207 | MDC005423.3118010-6700    | 3.44525      | AT3G23240.1 | ATERF1, ERF1                  | ethylene response factor 1                                                |
| MDP0000249227 | MDC005445.1362589-31825   | 2.11406      | AT3G53620.1 | ATPPa4, PPa4                  | pyrophosphorylase 4                                                       |
| 0             | MDC005456.10131462-31741  | -2.20103     |             |                               |                                                                           |
| 0             | MDC005479.5219099-1266    | 1.79769e+308 |             |                               |                                                                           |
| MDP0000273966 | MDC005490.2408153-8416    | 1.79769e+308 | AT5G66180.3 |                               | S-adenosyl-L-methionine-dependent methyltransferases superfamily protein  |
| MDP0000273394 | MDC005490.24331260-37061  | 2.95771      | AT5G66160.1 | ATRMR1, RMR1                  | receptor homology region transmembrane domain rln H2 motif protein 1      |
| 0             | MDC005605.67912982-15465  | 4.02694      | AT1G06650.2 |                               | 2-oxoalotaurin (2OG) and Fe(II)-dependent oxygenase superfamily protein   |
| 0             | MDC005625.4104432-4879    | 1.79769e+308 |             |                               |                                                                           |
| MDP0000257243 | MDC005640.2063033-6198    | 4.45015      | AT1G73050.1 |                               | Glucose-methanol-choline (GMC) oxidoreductase family protein              |
| 0             | MDC005648.3965701-5725    | 1.79769e+308 |             |                               |                                                                           |
| MDP0000679280 | MDC005665.2235790-9206    | 1.87481      | AT3G16770.1 | ATEBP, EBP, ERF72, RAP2.3     | ethylene-responsive element binding protein                               |
| MDP0000807958 | MDC005672.14342154-43198  | -3.70623     | AT5G51550.1 | EXL3                          | EXORDIUM like 3                                                           |
| MDP0000271007 | MDC005673.3234405-10172   | 1.73266      | AT3G53970.1 |                               | proteasome inhibitor-related                                              |
| MDP0000275079 | MDC005673.3401859-2675    | 2.64139      | AT3G53970.1 |                               | proteasome inhibitor-related                                              |
| MDP0000276802 | MDC005701.391549-9015     | -2.13886     | AT1G64090.1 | RTNLB3                        | Reticular like protein B3                                                 |
| 0             | MDC005717.700845-1059     | 1.79769e+308 |             |                               |                                                                           |
| MDP0000271088 | MDC005717.70836286-47025  | 1.79769e+308 | AT1G79830.1 | GC5                           | golgin candidate 5                                                        |
| MDP0000784851 | MDC005723.274102-5374     | 1.79769e+308 | AT1G49000.1 |                               |                                                                           |
| MDP0000951239 | MDC005735.2533461-9299    | -1.71542     | AT4G05320.2 | UBQ10                         | polyubiquitin 10                                                          |
| MDP0000624279 | MDC005778.440252-801      | 1.79769e+308 | AT4G20000.1 |                               | VQ motif-containing protein                                               |
| MDP0000178868 | MDC005799.514759-806      | -2.33718     | AT5G17680.1 |                               | Disease resistance protein (TIR-NBS-LRR class), putative                  |
| MDP0000232692 | MDC005811.34123198-25119  | 2.96568      | AT3G53560.1 | ATB5-A, ATCB5-E, B5 #2, CB5-E | cytochrome B5 isoform protein                                             |
| 0             | MDC005828.2543570-4032    | 1.79769e+308 |             |                               |                                                                           |
| MDP0000257423 | MDC005846.44516819-19559  | 1.48523      | AT2G37430.1 |                               | C2H2 and C2HC zinc fingers superfamily protein                            |
| MDP0000769402 | MDC005857.33310992-11123  | 1.79769e+308 | AT3G07700.3 |                               | Protein kinase superfamily protein                                        |
| 0             | MDC005890.11917882-18863  | 2.27453      |             |                               |                                                                           |
| MDP0000279409 | MDC005893.6217340-26688   | 1.79769e+308 | AT1G50030.1 | TOR                           | target of rapamycin                                                       |
| 0             | MDC005927.3935902-6584    | 3.89137      | AT5G10830.1 |                               | S-adenosyl-L-methionine-dependent methyltransferases superfamily protein  |
| MDP0000280686 | MDC005934.14695-15478     | 1.79769e+308 | AT4G13180.1 |                               | NAD(P)-binding Rossmann-fold superfamily protein                          |
| MDP0000507805 | MDC005987.2551295-1536    | 1.82319      | AT2G38470.1 | ATWRKY33, WRKY33              | WRKY DNA-binding protein 33                                               |
| MDP0000282531 | MDC005992.42510230-24855  | 1.79769e+308 | AT2G16230.1 |                               | O-GlcNAcyl hydrolases family 17 protein                                   |
| MDP0000173750 | MDC006022.7106794-7361    | 1.79769e+308 | AT4G37710.1 |                               | VQ motif-containing protein                                               |
| MDP0000281307 | MDC006027.2262770-5589    | 1.79769e+308 | AT5G07910.1 |                               | Leucine-rich repeat (LRR) family protein                                  |
| MDP0000280867 | MDC006113.2827307-2152    | 1.79769e+308 | AT5G25757.1 |                               | RNA polymerase I-associated factor PAF67                                  |
| MDP0000233439 | MDC006132.11038822-42176  | 1.79769e+308 | AT2G31955.1 | CNX2                          | cofactor of nitrate reductase and xanthine dehydrogenase 2                |
| MDP0000233439 | MDC006132.1104237-42590   | 1.79769e+308 | AT2G31955.1 | CNX2                          | cofactor of nitrate reductase and xanthine dehydrogenase 2                |
| MDP0000233440 | MDC006132.1104034-44983   | 2.81494      |             |                               |                                                                           |
| MDP0000344124 | MDC006216.1511502-1745    | 1.79769e+308 |             |                               |                                                                           |
| MDP0000280820 | MDC006246.468882-959      | 2.04655      |             |                               |                                                                           |
| 0             | MDC006260.4628079-8672    | 2.73287      | AT1G23440.1 |                               | Peptidase C15, pyrroglutamyl peptidase I-like                             |
| MDP0000281098 | MDC006273.12926010-22757  | -2.5382      | AT5G51440.1 |                               | HSP20-like chaperones superfamily protein                                 |
| MDP0000238184 | MDC006273.74424-2967      | -2.52469     | AT5G51440.1 |                               | HSP20-like chaperones superfamily protein                                 |
| MDP0000032171 | MDC006283.26135240-41767  | -1.94697     | AT1G09510.1 |                               | Protein of unknown function, DUF538                                       |
| 0             | MDC006289.4087320-58      |              |             |                               |                                                                           |

|               |                           |             |             |                                                                                   |
|---------------|---------------------------|-------------|-------------|-----------------------------------------------------------------------------------|
| MDP0000843913 | MDC006630.345:13587-14886 | 1.79304     | AT2G36690.1 | 2-oxoglutarate (2OG) and Fe(II)-dependent oxygenase superfamily protein           |
| MDP0000552328 | MDC006653.435:4109-5236   | 2.26965     | AT1G75800.1 | Pathogenesis-related thaumatin superfamily protein                                |
| MDP0000249299 | MDC006684.239:7756-10611  | -2.91344    | AT3G21190.1 | O-fucosyltransferase family protein                                               |
| MDP0000249161 | MDC006776.574:7590-21009  | 1.79769+308 | AT4G34580.1 | Sec14p-like phosphatidylinositol transfer family protein                          |
| MDP0000405576 | MDC006783.229:11947-13407 | 1.79769+308 | AT1G52433.1 |                                                                                   |
| MDP0000614645 | MDC006784.251:4983-11622  | 2.1349      | AT3G25655.1 |                                                                                   |
| 0             | MDC006793.328:2502-2994   | 2.61703     |             | inflorescence deficient in abscission (IDA)-like 1                                |
| MDP0000248822 | MDC006814.441:8965-9324   | 5.62372     | AT2G26560.1 | Phospholipase A 2A                                                                |
| MDP0000814329 | MDC006848.168:4788-4157   | 2.82974     | AT3G20650.1 | ATP-citrate lyase B-1                                                             |
| MDP0000805422 | MDC006858.526:1099-1672   | 1.86738     | AT4G17500.1 | ethylene responsive element binding factor 1                                      |
| MDP0000343634 | MDC006858.527:5849-6150   | -3.44095    |             |                                                                                   |
| MDP0000238475 | MDC006888.339:876-1073    | 1.79769+308 | AT3G30300.1 | O-fucosyltransferase family protein                                               |
| MDP0000178516 | MDC006898.720:8191-8834   | -2.21317    | AT1G66295.1 |                                                                                   |
| MDP0000136298 | MDC006922.133:35876-36560 | -3.84131    | AT5G09530.1 | hydroxyproline-rich glycoprotein family protein                                   |
| MDP0000248516 | MDC006922.133:35876-36560 | -3.84131    | AT5G09530.1 | hydroxyproline-rich glycoprotein family protein                                   |
| MDP0000137117 | MDC006985.165:1223-3076   | -1.92555    | AT3G11400.1 | eukaryotic translation initiation factor 3G1                                      |
| 0             | MDC006994.179:16210-16462 | 1.79769+308 |             |                                                                                   |
| MDP0000184167 | MDC006995.275:50236-50262 | 1.79769+308 |             |                                                                                   |
| MDP0000617009 | MDC007021.246:25478-25865 | -2.50768    | AT1G80770.2 | P-loop containing nucleoside triphosphate hydrolases superfamily protein          |
| 0             | MDC007024.343:8632-8930   | 2.35329     | AT2G46600.1 | Calcium-binding EF-hand family protein                                            |
| MDP0000182364 | MDC007070.485:4341-4878   | -2.28142    | AT5G38760.1 | Late embryogenesis abundant protein (LEA) family protein                          |
| MDP0000806544 | MDC007073.330:12070-12457 | 1.79769+308 | AT3G09270.1 | glutathione S-transferase TAU8                                                    |
| 0             | MDC007088.513:4788-1156   | 1.79769+308 | AT2G24810.2 | ATP family protein                                                                |
| MDP0000279516 | MDC007100.397:805-12837   | 1.79769+308 | AT2G18470.1 | rod-like extrinsic-like receptor kinase 4                                         |
| MDP0000249404 | MDC007109.204:49-2474     | 1.79769+308 | AT4G00590.1 | N-terminal nucleophile aminohydrolases (Ntn hydrolases) superfamily protein       |
| MDP0000147996 | MDC007197.415:11084-11948 | 1.79769+308 | AT3G08690.1 | ubiquitin-conjugating enzyme 11                                                   |
| MDP0000176426 | MDC007216.431:8449-7603   | 1.79769+308 | AT1G68450.1 | VC motif-containing protein                                                       |
| 0             | MDC007223.300:45679-45974 | -2.75104    |             |                                                                                   |
| MDP0000279533 | MDC007236.83:16404-17781  | 1.79769+308 | AT3G26040.1 | HXXXD-type acyl-transferase family protein                                        |
| MDP0000181621 | MDC007245.594:763-2225    | 1.79769+308 | AT3G08880.1 |                                                                                   |
| MDP0000693594 | MDC007269.339:4912-5995   | 2.40891     | AT4G37300.1 | maternal effect embryo arrest 59                                                  |
| MDP0000279107 | MDC007287.149:7106-7274   | 1.79769+308 | AT2G27980.1 | Acyl-CoA N-acyltransferase with RING/FYVE/PHD-type zinc finger domain             |
| MDP0000811844 | MDC007352.390:117258      | 1.82193     |             |                                                                                   |
| 0             | MDC007364.345:4479-4876   | 1.8905      |             |                                                                                   |
| MDP0000147939 | MDC007394.331:695-1727    | -2.14127    | AT3G55430.1 | O-Glycosyl hydrolases family 17 protein                                           |
| MDP0000180472 | MDC007395.672:2994-3955   | -5.2714     | AT4G25040.1 | Uncharacterised protein family (UPF0497)                                          |
| MDP0000175691 | MDC007406.309:1539-2750   | 1.79769+308 | AT5G28000.1 | 2-oxoglutarate (2OG) and Fe(II)-dependent oxygenase superfamily protein           |
| MDP0000123467 | MDC007407.185:1806-1908   | 1.79769+308 | AT5G13490.1 | cytochrome P450, family 72, subfamily A, polypeptide 9                            |
| MDP0000123467 | MDC007407.185:1806-2255   | 1.79769+308 | AT5G13080.1 | WRKY DNA-binding protein 75                                                       |
| MDP0000282711 | MDC007441.706:4194-6829   | 1.9882      | AT3G13710.1 | preylated RAB acceptor 1.F4                                                       |
| MDP0000231813 | MDC007467.200:80611-80777 | 1.79769+308 | AT3G26580.1 | Late embryogenesis abundant protein (LEA) family protein                          |
| 0             | MDC007474.161:727-1187    | 2.13649     |             |                                                                                   |
| MDP0000281921 | MDC007517.244:812-8403    | 1.79769+308 | AT4G02920.1 |                                                                                   |
| MDP0000231711 | MDC007566.303:5209-5295   | 1.79769+308 | AT3G25590.1 |                                                                                   |
| 0             | MDC007581.595:2473-2576   | 1.79769+308 | AT4G28460.1 | unknown protein                                                                   |
| MDP0000178934 | MDC007586.376:13849-14356 | -1.89038    | AT2G25770.1 | Polyketide cyclase/dehydrase and lipid transport superfamily protein              |
| MDP0000238652 | MDC007632.133:37-167      | 1.79769+308 | AT5G15860.1 | prenylcysteine methyltransferase                                                  |
| MDP0000943804 | MDC007651.256:10939-11228 | 1.79769+308 | AT4G32330.1 | ascorbate peroxidase 6                                                            |
| MDP0000281059 | MDC007667.245:11085-11336 | 1.79769+308 | AT1G71980.1 | Protease-associated (PA) RING/U-box zinc finger family protein                    |
| MDP0000462809 | MDC007696.347:224-1274    | -2.36735    | AT4G32390.1 | Nucleotide-sugar transporter family protein                                       |
| MDP0000284756 | MDC007726.450:8011-6436   | -1.90333    | AT1G78880.1 | Ubiquitin-specific protease family C19-related protein                            |
| MDP0000279567 | MDC007779.587:2989-3343   | 1.79769+308 | AT1G4630.1  | cytochrome P450, family 72, subfamily A, polypeptide 14                           |
| 0             | MDC007797.587:3489-4308   | 1.95177     | AT3G14880.1 | signal recognition particle receptor alpha subunit family protein                 |
| MDP0000320004 | MDC007801.297:1668-14062  | -2.60268    | AT4G30600.1 | Phosphate-responsive 1 family protein                                             |
| MDP0000279567 | MDC007839.76:2055-4737    | -1.98232    | AT1G35140.1 | Acyl-CoA N-acyltransferases (NAT) superfamily protein                             |
| MDP0000177906 | MDC007892.251:15906-1664  | 1.86793     | AT5G16800.2 | WRKY DNA-binding protein 40                                                       |
| MDP0000156208 | MDC007970.423:2221-3402   | 1.79769+308 | AT5G17820.1 | Peroxidase superfamily protein                                                    |
| 0             | MDC008017.329:6473-7175   | 2.01024     | AT2G46150.1 | Late embryogenesis abundant (LEA) hydroxyproline-rich glycoprotein family protein |
| MDP0000176969 | MDC008031.166:10358-10802 | -1.71749    | AT2G33820.1 | Mitochondrial substrate carrier family protein                                    |
| 0             | MDC008031.166:8984-9384   | -1.91543    | AT3G60030.1 | squamosa promoter-binding protein-like 12                                         |
| MDP0000178304 | MDC008070.309:694-1245    | 1.79769+308 |             |                                                                                   |
| MDP0000180902 | MDC008107.194:8214-8566   | 1.79769+308 | AT3G09270.1 | glutathione S-transferase TAU8                                                    |
| MDP0000176147 | MDC008111.220:3257-3489   | 1.79769+308 | AT1G52800.1 | 2-oxoglutarate (2OG) and Fe(II)-dependent oxygenase superfamily protein           |
| 0             | MDC008132.347:2842-3005   | 1.79769+308 | AT3G08010.1 | RNA binding                                                                       |
| MDP0000282113 | MDC008133.431:23701-30184 | -2.02622    | AT5G39710.1 | Tetratricopeptide repeat (TPR)-like superfamily protein                           |
| MDP0000124013 | MDC008156.258:1804-1914   | 1.79769+308 | AT4G13250.1 | NAD(P)-binding Rossmann-fold superfamily protein                                  |
| 0             | MDC008185.596:848-1396    | 4.18103     |             |                                                                                   |
| MDP0000124065 | MDC008191.272:1308-2582   | 1.33928     | AT2G27830.1 |                                                                                   |
| 0             | MDC008212.493:3616-4058   | -2.22497    | AT5G43180.1 | Protein of unknown function, DUF599                                               |
| MDP0000280265 | MDC008216.318:26921-27156 | 1.79769+308 | AT4G20620.1 | FAD-binding Berberine family protein                                              |
| 0             | MDC008227.470:6-265       | 2.67388     |             |                                                                                   |
| MDP0000248806 | MDC008228.299:15226-24695 | 1.79769+308 | AT3G26070.1 | Plastid-lipid associated protein PAP / fibrillin family protein                   |
| MDP0000280265 | MDC008231.317:2716-4497   | 2.51441     | AT5G24090.1 | chitinase A                                                                       |
| MDP0000182082 | MDC008275.176:13207-16886 | 1.834       | AT1G10670.1 | ATP-citrate lyase A-1                                                             |
| MDP0000149907 | MDC008363.128:1344-2027   | -2.4068     | AT1G51970.1 | S-locus lectin protein kinase family protein                                      |
| MDP0000149907 | MDC008363.128:1584-2982   | 2.61724     | AT5G05190.1 | plant invertase/pectin methyltransferase inhibitor superfamily protein            |
| MDP0000281408 | MDC008378.283:5092-5500   | 1.92703     | AT5G05190.1 | serine hydroxymethyltransferase 7                                                 |
| 0             | MDC008382.148:13043-13406 | 1.79769+308 |             |                                                                                   |
| MDP0000281701 | MDC008389.364:4307-10927  | -2.13921    | AT2G34770.1 | fatty acid hydroxylase 1                                                          |
| MDP0000279279 | MDC008406.198:19837-20128 | 1.79769+308 | AT4G21390.1 | B120                                                                              |
| MDP0000636165 | MDC008510.241:8559-10422  | 3.04068     | AT4G02330.1 | Plant invertase/pectin methyltransferase inhibitor superfamily protein            |
| 0             | MDC008521.354:1264-1327   | 1.79769+308 |             |                                                                                   |
| MDP0000720186 | MDC008527.309:2198-2323   | 1.79769+308 | AT2G34250.1 | SecY protein transport family protein                                             |
| MDP0000487702 | MDC008598.180:29014-29454 | 1.79769+308 | AT1G30950.1 | F-box family protein                                                              |
| 0             | MDC008593.271:10114-10663 | 2.28791     | AT1G57520.1 | nodulin MN21 / EamA-like transporter family protein                               |
| MDP0000110910 | MDC008563.295:2531-3710   | 1.79769+308 | AT5G0420.2  | Cupredoxin superfamily protein                                                    |
| MDP0000873376 | MDC008586.420:17793-18695 | -1.96409    | AT1G72230.1 |                                                                                   |
| 0             | MDC008600.171:902-1400    | 4.88147     |             |                                                                                   |
| MDP0000285032 | MDC008614.269:11939-16468 | 2.46831     | AT3G18830.1 | polyol/monosaccharide transporter 5                                               |
| MDP0000279227 | MDC008674.603:144-2027    | -2.4068     | AT2G22740.1 | Cysteine proteases superfamily protein                                            |
| MDP0000124372 | MDC008769.540:381-2223    | 1.79769+308 | PUB23       | plant U-box 23                                                                    |
| MDP0000190474 | MDC008769.546:2286-3508   | 1.79769+308 | PUB23       | plant U-box 23                                                                    |
| MDP0000191423 | MDC008781.274:12188-14442 | 2.96124     | AT1G22170.1 | Phosphoglycerate mutase family protein                                            |
| MDP0000191423 | MDC008781.274:14553-14944 | 2.64127     | AT1G22170.1 | Phosphoglycerate mutase family protein                                            |
| MDP0000288293 | MDC008798.391:1937-20212  | 5.12026     | AT1G24023.1 | MLP423                                                                            |
| MDP0000185506 | MDC008808.256:4241-10398  | -2.75566    | AT5G12190.1 | RNA-binding (RMR/RBP motifs) family protein                                       |
| MDP0000188275 | MDC008847.375:4627-4939   | 1.79769+308 | AT1G56660.1 |                                                                                   |
| MDP0000287351 | MDC008886.243:375-5075    | 1.79769+308 | AT5G36930.2 | Disease resistance protein (TIR-NBS-LRR class) family                             |
| MDP0000969497 | MDC008926.173:3439-3781   | -2.3258     | AT5G59320.1 | lipid transfer protein 3                                                          |
| MDP0000734515 | MDC008930.262:14950-15201 | 1.79769+308 | AT1G05180.1 | NAD(P)-binding Rossmann-fold superfamily protein                                  |
| MDP0000290937 | MDC008947.382:14535-20023 | 3.12302     |             |                                                                                   |
| MDP0000347336 | MDC008953.300:591-12745   | 2.93419     |             |                                                                                   |
| 0             | MDC008958.527:6035-6390   | 1.79769+308 |             |                                                                                   |
| MDP0000188138 | MDC008981.224:3552-6225   | 1.79769+308 | AT5G21940.1 |                                                                                   |
| MDP0000907032 | MDC009045.262:4301-14844  | 2.52716     | AT5G48100.1 | Laccase/Diphenoxy oxidase family protein                                          |
| MDP0000291620 | MDC009067.627:8837-9392   | -2.07458    | AT1G58170.1 | Disease resistance-responsive (drigent-like protein) family protein               |
| MDP0000287628 | MDC009095.320:4320-11111  | -1.76609    | AT3G58810.1 | metal tolerance protein A2                                                        |
| MDP0000193050 | MDC009100.720:14269-19338 | 2.72097     | AT5G26340.1 | Major facilitator superfamily protein                                             |
| 0             | MDC009100.743:10602-10864 | 1.79769+308 |             |                                                                                   |
| MDP0000746652 | MDC009139.374:7849-8934   | 2.91738     | AT2G46150.1 | Late embryogenesis abundant (LEA) hydroxyproline-rich glycoprotein family         |
| MDP0000138090 | MDC009231.274:4163-4333   | 1.79769+308 | AT1G58440.1 | FAD/NAD(P)-binding oxidoreductase family protein                                  |
| MDP0000841703 | MDC009247.159:1041-7164   | 2.43611     | AT2G47800.1 | multidrug resistance-associated protein 4                                         |
| MDP0000361876 | MDC009250.269:24582-24915 | 1.79769+308 | AT3G11440.1 | myb domain protein 65                                                             |
| 0             | MDC009251.558:7920-10453  | -3.37738    | AT4G03210.1 | xyloglucan endotransglucosylase/hydrolase 9                                       |
| MDP0000124719 | MDC009291.198:2462-2529   | 1.79769+308 |             |                                                                                   |
| MDP0000239720 | MDC009297.162:8847-9498   | -1.9762     | AT5G47610.1 | RING/U-box superfamily protein                                                    |
| MDP0000671324 | MDC009336.266:5288-15663  | 2.26922     | AT5G05930.1 | guanlyl cyclase 1                                                                 |
| MDP0000054527 | MDC009349.320:566-1709    | 1.79769+308 | AT4G10490.1 | 2-oxoglutarate (2OG) and Fe(II)-dependent oxygenase superfamily protein           |
| MDP0000262674 | MDC009360.278:896-3116    | 3.05153     | AT1G78880.1 | D-mannose binding lectin protein with Apple-like carbohydrate-binding domain      |
| 0             | MDC009368.194:1356-15917  | -1.88738    | AT1G04743.1 |                                                                                   |
| MDP0000865425 | MDC009393.166:1252-1510   | 1.79769+308 |             |                                                                                   |
| MDP0000941000 | MDC009404.603:2897-8558   | 1.79769+308 | AT5G17680.1 | disease resistance protein (TIR-NBS-LRR class), putative                          |
| MDP0000290562 | MDC009483.39:12100-14889  | 8.20719     | AT1G47670.1 | Transmembrane amino acid transporter family protein                               |
| MDP0000936748 | MDC009567.313:17183-20584 | -1.89197    | AT3G5570.1  | GATA type zinc finger transcription factor family protein                         |
| MDP0000150032 | MDC009601.163:20757-21849 | -1.7773     |             |                                                                                   |
| MDP0000285243 | MDC009604.192:12640-14455 | 1.79769+308 | AT4G13220.1 |                                                                                   |
| MDP0000187983 | MDC009616.38:20066-24921  | 2.38728     | AT4G19810.1 | Glycosyl hydrolase family protein with chitinase insertion domain                 |
| MDP0000290045 | MDC009616.38:20066-24921  | 2.38728     | AT4G19810.1 | Glycosyl hydrolase family protein with chitinase insertion domain                 |
| MDP0000290045 | MDC009630.367:24050-24262 | 1.79769+308 | AT2G03810.4 | 18S pre-ribosomal assembly protein gar2-related                                   |
| MDP0000125002 | MDC009674.311:12650-17839 | 1.79769+308 | AT2G10400.1 | S-adenosyl-L-methionine-dependent methyltransferases superfamily protein          |
| MDP0000125002 | MDC009727.218:5205-52777  | 1.79769+308 | AT2G42810.2 | protein phosphatase 5.2                                                           |
| MDP0000757636 | MDC009738.162:4550-8590   | 1.79769+308 | AT1G26810.1 | galactosyltransferase 1                                                           |
| MDP00001935   |                           |             |             |                                                                                   |

|               |                            |              |             |                           |                                                                                                           |
|---------------|----------------------------|--------------|-------------|---------------------------|-----------------------------------------------------------------------------------------------------------|
| 0             | MDC009830.388:3008-4348    | 1.79769e+308 | AT5G1930.1  | CHS, TT4, ATCHS           | Chalcone and stilbene synthase family protein                                                             |
| MDP0000703851 | MDC009836.225:17066-18219  | 2.31731      | AT4G37300.1 | MEE59                     | Mutual effect embryo arrest 59                                                                            |
| MDP0000850409 | MDC009848.204:8363-8600    | -4.67506     |             |                           |                                                                                                           |
| MDP0000125095 | MDC009861.437:3891-4319    | -2.80388     | AT5G38760.1 |                           | Late embryogenesis abundant protein (LEA) family protein                                                  |
| MDP0000291925 | MDC009861.464:1768-1370    | -2.02682     | AT5G38760.1 |                           | Late embryogenesis abundant protein (LEA) family protein                                                  |
| MDP0000187103 | MDC009909.204:5928-6981    | 1.79769e+308 | AT5G67080.1 | MAPKKK19                  | mitogen-activated protein kinase kinase kinase 19                                                         |
| MDP0000454694 | MDC009933.158:11532-19587  | -2.20363     | AT1G72820.1 |                           | Mitochondrial substrate carrier family protein                                                            |
| MDP0000125143 | MDC009940.459:13383-13777  | 1.79769e+308 | AT2G19385.1 |                           | Zinc ion binding                                                                                          |
| MDP0000287586 | MDC009986.307:3331-10534   | 2.41066      | AT5G49230.1 | HRB1                      | Drought-responsive family protein                                                                         |
| MDP0000191667 | MDC010015.212:1411-1436    | 2.13913      | AT4G13490.1 | ATLEUC1,IL1L1             | isocitrate lyase isomerase large subunit 1                                                                |
| MDP0000289011 | MDC010104.525:5261-8066    | 2.73062      | AT3G09270.1 | ATGSTU8,GSTU8             | glutathione S-transferase TAU 8                                                                           |
| MDP0000285894 | MDC010113.132:1890-6718    | 1.79769e+308 | AT5G53130.1 | ATCNGC1,CNGC1             | cyclic nucleotide gated channel 1                                                                         |
| MDP0000645502 | MDC010137.193:5899-6763    | 1.79769e+308 |             |                           |                                                                                                           |
| 0             | MDC010174.373:9987-12973   | 1.79769e+308 | AT2G46150.1 |                           | Late embryogenesis abundant (LEA) hydroxyproline-rich glycoprotein family                                 |
| MDP0000909081 | MDC010183.335:5076-5272    | 1.79769e+308 | AT5G63310.1 | ATNDPK2,NDPK IA,NDPK IA I | NAD(P)-linked oxidoreductase superfamily protein                                                          |
| MDP0000176953 | MDC010195.886:3529-4847    | -3.53045     | AT1G55260.1 |                           | nonclassical diphosphate kinase 2                                                                         |
| MDP0000125336 | MDC010201.200:11935-13257  | 1.6832       | AT5G59530.1 |                           | ubiquitin inhibitor/lipid-transfer protein/seed storage 2S albumin superfamily protein                    |
| MDP0000777260 | MDC010224.339:7684-14866   | 1.79769e+308 |             |                           | 2-oxoglutarate (2OG) and Fe(II)-dependent oxygenase superfamily protein                                   |
| MDP0000138612 | MDC010239.242:2210-2815    | 3.28285      |             | MLP423                    | MLP-like protein 423                                                                                      |
| MDP0000116244 | MDC010239.242:2917-3044    | 1.79769e+308 | AT1G24020.1 | MLP423                    | MLP-like protein 423                                                                                      |
| MDP0000638442 | MDC010241.223:2589-3910    | 2.42596      | AT5G51970.1 |                           | GroES-like zinc-binding alcohol dehydrogenase family protein                                              |
| MDP0000188052 | MDC010241.225:11561-12807  | 2.52239      | AT5G51970.1 |                           | GroES-like zinc-binding alcohol dehydrogenase family protein                                              |
| MDP0000215295 | MDC010246.430:21589-22966  | 2.2344       | AT1G05010.1 | ACO4,EAT1,EFE             | ethylene-forming enzyme                                                                                   |
| MDP0000125388 | MDC010264.104:2067-4931    | 1.79769e+308 | AT3G51960.1 |                           | Protein kinase family protein                                                                             |
| MDP0000668138 | MDC010296.225:19484-19807  | 1.79769e+308 | AT3G52250.1 |                           | Duplicated homeodomain-like superfamily protein                                                           |
| MDP0000258062 | MDC010332.272:588-1152     | 1.79769e+308 | AT5G10350.1 |                           | RNA-binding (RRM/RBD/RNP motifs) family protein                                                           |
| MDP0000233489 | MDC010426.795:7913-8261    | 1.79769e+308 | AT5G48820.1 | ICK6,KRP3                 | inhibitor/interactor with cyclin-dependent kinase                                                         |
| MDP0000292448 | MDC010444.140:7446-9204    | -3.31146     | AT5G38020.1 |                           | S-adenosyl-L-methionine-dependent methyltransferases superfamily protein                                  |
| MDP0000738596 | MDC010462.160:15024-15860  | 1.79769e+308 |             |                           |                                                                                                           |
| MDP0000588940 | MDC010473.396:14867-15858  | -3.86943     | AT3G27200.1 |                           | Cupredoxin superfamily protein                                                                            |
| 0             | MDC010474.340:3456-4185    | 1.79769e+308 | AT2G46150.1 |                           | Late embryogenesis abundant (LEA) hydroxyproline-rich glycoprotein family                                 |
| 0             | MDC010476.238:18498-19659  | 4.06594      | AT2G46150.1 |                           | Late embryogenesis abundant (LEA) hydroxyproline-rich glycoprotein family                                 |
| MDP0000292131 | MDC010476.238:34773-35325  | 3.99199      | AT2G46150.1 |                           | Late embryogenesis abundant (LEA) hydroxyproline-rich glycoprotein family                                 |
| 0             | MDC010507.323:2408-2497    | 1.79769e+308 |             |                           |                                                                                                           |
| MDP0000288622 | MDC010541.240:1517-3505    | 1.79769e+308 | AT5G22860.1 |                           | Serine carboxypeptidase S28 family protein                                                                |
| MDP0000194046 | MDC010550.498:7038-7904    | 1.79769e+308 | AT3G09270.1 | ATGSTU8,GSTU8             | glutathione S-transferase TAU 8                                                                           |
| MDP0000566057 | MDC010577.405:11254-12570  | 1.79769e+308 | AT3G28690.1 |                           | 2-oxoglutarate (2OG) and Fe(II)-dependent oxygenase superfamily protein                                   |
| MDP0000557646 | MDC010584.403:9855-18868   | 1.79769e+308 | AT3G05500.1 |                           | Rubber elongation factor protein (REF)                                                                    |
| MDP0000289247 | MDC010589.234:1224-1539    | 1.79769e+308 |             | CYP716A1                  | cytochrome P450, family 716, subfamily A, polypeptide 1                                                   |
| MDP0000440922 | MDC010630.204:5140-5351    | 1.79769e+308 | AT1G08450.1 | ACIRT3,CRT3,EBS2,PSL1     | chalcone 3                                                                                                |
| MDP0000191951 | MDC010729.433:8183-8534    | 1.79769e+308 |             |                           |                                                                                                           |
| MDP0000259250 | MDC010766.217:2450-4361    | -2.08975     | AT4G11220.1 | BT2,RTNLB2                | VRB2-interacting protein 2                                                                                |
| MDP0000549056 | MDC010870.164:3464-9528    | 3.09695      | AT1G68840.1 | EDF2,RAp2.8,RAV2,TEM2     | related to ABI3/VP1 2                                                                                     |
| 0             | MDC010876.313:27953-28158  | 1.79769e+308 |             |                           |                                                                                                           |
| 0             | MDC010912.583:5714-6300    | 3.70536      |             | PRD6, ATPDR6              | pleiotropic drug resistance 6                                                                             |
| MDP0000893506 | MDC010932.713:30968-31739  | 1.79769e+308 | AT1G68450.1 |                           | VQ motif-containing protein                                                                               |
| MDP0000167492 | MDC010968.194:35563-43410  | 2.47673      | AT2G26780.1 |                           | ARM repeat superfamily protein                                                                            |
| 0             | MDC010981.1245:18382-19274 | 3.15588      | AT3G51960.1 | ACS1, AT-ACS1             | ACC synthase 1                                                                                            |
| MDP0000289768 | MDC011000.158:4622-5925    | 1.79769e+308 | AT3G23250.1 | ATMYB15,ATY19,MYB15       | myb domain protein 15                                                                                     |
| MDP0000126098 | MDC011163.578:6912-8415    | 1.79769e+308 | AT5G20030.1 |                           | Plant Tudor-like RNA-binding protein                                                                      |
| MDP0000188976 | MDC011170.439:2837-3077    | 1.79769e+308 | AT2G15960.1 |                           | Protein of unknown function (DUF607)                                                                      |
| MDP0000261552 | MDC011264.166:12261-14181  | -2.83625     | AT1G08575.1 |                           | Protein of unknown function (DUF666)                                                                      |
| MDP0000892427 | MDC011311.340:11831-15202  | 2.41446      | AT1G30755.1 |                           | enzyme binding/tetraprote binding                                                                         |
| MDP0000907603 | MDC011337.355:7470-8262    | -2.25482     | AT3G59400.1 | GUN4                      |                                                                                                           |
| 0             | MDC011359.150:1008-1311    | 1.79769e+308 |             |                           |                                                                                                           |
| 0             | MDC011372.235:19894-20135  | 1.79769e+308 |             |                           |                                                                                                           |
| MDP0000560179 | MDC011403.321:1647-19830   | 2.34318      | AT1G69370.1 | cm-3,CM3                  | chorismate mutase 3                                                                                       |
| 0             | MDC011401.250:14560-14880  | -2.31698     |             |                           |                                                                                                           |
| MDP0000138204 | MDC011412.200:2474-2656    | 1.79769e+308 | AT1G01650.1 | ATSPPL4,SPPL4             | SIGNAL PEPTIDE PEPTIDASE-LIKE 4                                                                           |
| MDP0000415910 | MDC011412.206:13093-13390  | 1.79769e+308 | AT4G01840.1 | ATKCO5,ATTPK5,KCO5,TPK5   | Ca2+ activated outward rectifying K+ channel 5                                                            |
| MDP0000290114 | MDC011437.437:35717-37203  | -2.74555     | AT2G01770.1 | ATVIT1,VIT1               | vacuolar iron transporter 1                                                                               |
| MDP0000051172 | MDC011441.318:5071-6426    | 1.79769e+308 | AT4G38620.1 | ATMYB4,MYB4               | myb domain protein 4                                                                                      |
| MDP0000892427 | MDC011449.971:1885-12670   | 1.79769e+308 | AT2G19880.1 |                           | unknown protein                                                                                           |
| MDP0000286168 | MDC011456.83:10260-11593   | -2.17958     | AT5G13490.1 | AAC2                      | ADP/ATP carrier 2                                                                                         |
| 0             | MDC011459.391:12253-12872  | 1.79769e+308 | AT2G39210.1 |                           | Major facilitator superfamily protein                                                                     |
| MDP0000361947 | MDC011469.280:8071-8371    | 3.51144      |             |                           |                                                                                                           |
| MDP0000619511 | MDC011469.280:8141-8293    | 2.3818       | AT4G11820.2 | EMB278,FKP1,HMGS,MVA1     | hydroxymethylglutaryl-CoA synthase / HMG-CoA synthase / 3-hydroxy-3-methylglutaryl coenzyme A synthase    |
| MDP0000902434 | MDC011537.547:9633-10450   | 2.21998      | AT4G05030.1 |                           | Copper transport protein family                                                                           |
| MDP0000902434 | MDC011542.145:14812-15089  | -2.78853     | AT4G05030.1 |                           | Copper transport protein family                                                                           |
| MDP0000290254 | MDC011554.266:8336-11088   | 2.79301      |             |                           |                                                                                                           |
| MDP0000185643 | MDC011581.443:3493-3055    | 2.3818       | AT1G70990.1 | GATL9,LGT8                | glucosyl transferase family 8                                                                             |
| MDP0000185643 | MDC011581.443:34972-37559  | 1.79769e+308 | AT1G70990.1 | GATL9,LGT8                | glucosyl transferase family 8                                                                             |
| 0             | MDC011583.325:5690-5843    | 1.79769e+308 |             |                           |                                                                                                           |
| MDP0000150382 | MDC011596.290:3499-8925    | 2.75396      | AT2G43820.1 | ATSAGT1,GT,SAGT1,SGT1,UC  | UDP-glucosyltransferase 74F2                                                                              |
| 0             | MDC011598.259:10860-11398  | 2.42453      |             |                           |                                                                                                           |
| MDP0000926540 | MDC011602.378:2520-9183    | 1.88683      | AT3G02430.1 |                           | Protein of unknown function (DUF679)                                                                      |
| 0             | MDC011603.242:16362-17137  | 1.86683      | AT4G37200.1 |                           | CAP (Cysteine-rich secretory proteins, Antigen 5, and Pathogenesis-related 1 protein) superfamily protein |
| MDP0000199152 | MDC011612.43:0-3077        | 2.18079      | AT4G16730.1 | TPS02                     | terpene synthase 02                                                                                       |
| MDP0000139971 | MDC011642.187:6067-13143   | 2.14987      | AT4G36710.1 |                           | GRAS family transcription factor                                                                          |
| MDP0000128455 | MDC011659.224:3319-4725    | -3.00214     | AT1G10200.1 | WLIM1                     | GATA type zinc finger transcription factor family protein                                                 |
| MDP0000292543 | MDC011673.338:3911-1160    | 1.79769e+308 | AT3G22380.2 | TIC                       | time for coffee                                                                                           |
| MDP0000251253 | MDC011704.133:11215-11348  | 1.79769e+308 | AT1G76490.1 | HMG1,HMGR1                | hydroxymethylglutaryl CoA reductase 1                                                                     |
| MDP0000771887 | MDC011723.416:11571-12015  | -2.22297     | AT1G60950.1 | ATFD2,FED A               | 2Fe-2S ferredoxin-like superfamily protein                                                                |
| MDP0000328550 | MDC011745.99:15351-15722   | -2.18845     |             |                           |                                                                                                           |
| 0             | MDC011770.416:7739-8412    | 2.51628      | AT2G46150.1 |                           | Late embryogenesis abundant (LEA) hydroxyproline-rich glycoprotein family                                 |
| MDP0000873235 | MDC011773.384:2494-3055    | 5.81577      | AT2G23270.1 |                           | uridine protein                                                                                           |
| MDP0000430546 | MDC011784.207:16-913       | 2.39345      | AT3G54420.1 | ATCHITV1,ATEP3,CHIV,EP3   | homolog of carrot EP3-3 chitinase                                                                         |
| MDP0000336546 | MDC011784.298:1990-4727    | 2.46989      | AT3G54420.1 | ATCHITV1,ATEP3,CHIV,EP3   | homolog of carrot EP3-3 chitinase                                                                         |
| MDP0000871219 | MDC011792.236:31818-38424  | 1.79769e+308 | AT3G27460.1 |                           | SGF29 tudor-like domain                                                                                   |
| MDP0000618065 | MDC011802.265:2819-3744    | -1.97863     | AT3G26420.1 | ATRZ-1A                   | RNA-binding (RRM/RBD/RNP motifs) family protein with retrovirus zinc finger-like domain                   |
| MDP0000416120 | MDC011822.207:1057-11980   | 1.79769e+308 | AT3G11820.2 | AT-SYR1,ATSY1P21,ATSYR1,1 | synaptin of plants 121                                                                                    |
| 0             | MDC011856.191:7047-7379    | 1.79769e+308 | AT4G27060.1 | CN,SPR2,TOR1              | ARM repeat superfamily protein                                                                            |
| 0             | MDC011857.111:12385-12818  | -2.80994     |             |                           |                                                                                                           |
| 0             | MDC011938.114:11698-11941  | 1.79769e+308 |             |                           |                                                                                                           |
| MDP0000259719 | MDC011953.180:21178-29290  | 2.13451      | AT1G21480.1 |                           | Exostosin family protein                                                                                  |
| 0             | MDC011960.157:14970-15370  | 1.79769e+308 |             |                           |                                                                                                           |
| MDP0000203230 | MDC011969.177:1032-2423    | 5.0803       | AT5G38940.1 |                           | RmlC-like cupins superfamily protein                                                                      |
| MDP0000139824 | MDC011983.274:13866-23337  | -2.1557      | AT1G34630.1 |                           | Uncharacterised protein family SERF                                                                       |
| MDP0000342813 | MDC011995.314:7397-7948    | 1.79769e+308 | AT2G20390.1 |                           |                                                                                                           |
| MDP0000576584 | MDC011995.314:6927-7232    | 1.79769e+308 | AT5G64160.1 |                           | FAD/NAD(P)-binding oxidoreductase family protein                                                          |
| MDP0000910523 | MDC011998.433:31142-33376  | 2.47451      | AT5G05320.1 |                           |                                                                                                           |
| MDP0000647373 | MDC012019.302:8116-8353    | 1.79769e+308 |             |                           |                                                                                                           |
| MDP0000140046 | MDC012024.335:4054-9352    | 2.79415      | AT5G47770.1 | FPS1                      | farnesyl diphosphate synthase 1                                                                           |
| 0             | MDC012039.280:32641-32933  | 1.79769e+308 |             |                           |                                                                                                           |
| MDP0000750556 | MDC012049.250:246-726      | 3.88038      | AT1G24020.1 | MLP423                    | MLP-like protein 423                                                                                      |
| MDP0000259681 | MDC012049.376:1086-2288    | 3.32901      |             |                           |                                                                                                           |
| MDP0000418277 | MDC012049.376:7654-8475    | 4.23797      |             |                           |                                                                                                           |
| MDP0000260110 | MDC012049.377:1467-1947    | 3.64793      | AT1G24020.1 | MLP423                    | MLP-like protein 423                                                                                      |
| MDP0000611200 | MDC012049.378:11944-12424  | 4.45514      | AT1G24020.1 | MLP423                    | MLP-like protein 423                                                                                      |
| MDP0000195614 | MDC012049.378:15381-15861  | 3.37256      | AT1G24020.1 | MLP423                    | MLP-like protein 423                                                                                      |
| MDP0000231443 | MDC012049.378:7676-8991    | 3.59297      | AT1G24020.1 | MLP423                    | MLP-like protein 423                                                                                      |
| MDP0000241271 | MDC012083.378:41-1721      | -2.27036     | AT3G06778.1 |                           | Chaperone DnaJ-domain superfamily protein                                                                 |
| MDP0000152278 | MDC012083.521:11-527       | 4.0936       | AT4G16740.1 | ATTPS03,TPS03             | terpene synthase 03                                                                                       |
| MDP0000126789 | MDC012097.411:814-2116     | 1.79769e+308 | AT1G07230.1 | NPC1                      | non-specific phospholipase C1                                                                             |
| MDP0000233177 | MDC012168.191:14092-15547  | -3.4026      | AT1G10550.1 | XET_XTH33                 | xyloglucan:xyloglucosyl transferase 33                                                                    |
| MDP0000213558 | MDC012226.83:8174-8929     | 2.47451      | AT1G74950.1 | JAZ2,TIFY10B              | TIFY domain/Divergent CCT motif family protein                                                            |
| MDP0000126892 | MDC012245.148:3093-3709    | 1.79769e+308 | AT4G38060.2 |                           |                                                                                                           |
| MDP0000295823 | MDC012255.109:11234-11389  | 1.79769e+308 | AT5G20040.1 | ATIPT9,IPT9               | isopentenyltransferase 9                                                                                  |
| 0             | MDC012256.180:17521-17661  | 1.79769e+308 |             |                           |                                                                                                           |
| 0             | MDC012284.228:14592-15163  | 3.41084      |             |                           |                                                                                                           |
| MDP0000126954 | MDC012310.593:2815-9479    | 1.79769e+308 |             |                           |                                                                                                           |
| 0             | MDC012310.599:10117-10381  |              |             |                           |                                                                                                           |

|                |                           |             |                           |                                                                                                         |
|----------------|---------------------------|-------------|---------------------------|---------------------------------------------------------------------------------------------------------|
| MDP0000427172  | MDC012537.136:2472-3087   | 5.39463     | AT1G69060.1               | Chaperone DnaJ-domain superfamily protein                                                               |
| MDP0000648218  | MDC012539.194:16182-17073 | 1.9807      | AT1G23710.1               | Protein of unknown function (DUF1645)                                                                   |
| MDP0000150727  | MDC012578.402:50168-50408 | 1.79769+308 | AT1G50500.1               | Membrane trafficking VPS53 family protein                                                               |
| MDP0000127122  | MDC012582.369:20321-21404 | -1.95481    | AT2G32300.1               | UCC1                                                                                                    |
| MDP0000789528  | MDC012593.380:41193-42423 | -3.23263    | AT3G25250.1               | LHCb2.LHCb2.2                                                                                           |
| MDP0000152323  | MDC012595.126:7479-7658   | 1.79769+308 | AT3G22430.1               | phytochrome II light harvesting complex gene 2.2                                                        |
| MDP0000127134  | MDC012597.1552:1503-2265  | 3.29898     | AT3G23240.1               | ATERF1.ERF.1                                                                                            |
| MDP0000205052  | MDC012623.194:30088-30799 | 1.79769+308 |                           | ethylene response factor 1                                                                              |
| MDP0000300351  | MDC012623.194:31981-34645 | 1.79769+308 |                           |                                                                                                         |
| MDP0000197234  | MDC012641.253:15599-15998 | 1.93322     | AT5G14270.2               | ATBET9.BET9                                                                                             |
| MDP0000127185  | MDC012660.72:295-5944     | 1.79769+308 | AT5G10720.1               | ANAC002.ATAF1                                                                                           |
| MDP0000334047  | MDC012688.235:31743-33240 | 3.21746     |                           | bromodomain and extraterminal domain protein 9                                                          |
| MDP0000809488  | MDC012696.212:377-1037    | 1.91257     | AT4G27450.1               | NAC (No Apical Terminus) domain transcriptional regulator superfamily protein                           |
| 0              | MDC012716.121:13459-14896 | 1.88079     | AT4G11280.1               |                                                                                                         |
| MDP0000851204  | MDC012735.249:4715-5222   | -1.89038    | ACS6. ATAC56              | Aluminium induced protein with YGL and LRDR motifs                                                      |
| MDP0000241694  | MDC012816.263:1287-2659   | 3.41245     | AT2G25770.1               | 1-aminocyclopropane-1-carboxylic acid (acc) synthase 6                                                  |
| MDP0000299311  | MDC012816.264:988-1468    | 4.67582     | AT1G24020.1               | Polyketide cyclase/dehydrase and lipid transport superfamily protein                                    |
| MDP0000295542  | MDC012816.382:14124-14604 | 5.13553     | MLP423                    | MLP-like protein 423                                                                                    |
| MDP0000295543  | MDC012816.382:17333-17813 | 5.13221     | MLP423                    | MLP-like protein 423                                                                                    |
| MDP0000814399  | MDC012816.382:20717-21197 | 4.71788     | MLP423                    | MLP-like protein 423                                                                                    |
| MDP0000295540  | MDC012816.382:7552-8032   | 4.73806     | MLP423                    | MLP-like protein 423                                                                                    |
| MDP0000294030  | MDC012817.651:4113-4501   | 1.79769+308 |                           |                                                                                                         |
| MDP0000127346  | MDC012859.232:2291-2690   | 1.79769+308 | AT5G16940.1               | carbon-sulfur lyases                                                                                    |
| MDP0000364657  | MDC012885.350:14139-14436 | -1.84875    |                           |                                                                                                         |
| MDP0000470916  | MDC012888.280:16453-18375 | 2.25112     | AT5G20230.1               | ATBCB.BCB.SG14                                                                                          |
| MDP0000808076  | MDC012888.280:5525-6239   | 2.08673     | AT5G20230.1               | ATBCB.BCB.SG14                                                                                          |
| 0              | MDC012892.148:4018-4407   | 1.79769+308 |                           |                                                                                                         |
| MDP0000155307  | MDC012898.383:1071-4451   | -1.78424    | AT5G66740.1               | Protein of unknown function (DUF620)                                                                    |
| 0              | MDC012902.215:12407-12525 | 1.79769+308 | AT5G0710.1                | myoD1                                                                                                   |
| MDP0000879217  | MDC012905.365:22031-22294 | 1.79769+308 | AT5G58860.1               | cytochrome P450, family 86, subfamily A, polypeptide 1                                                  |
| MDP0000206620  | MDC012905.365:5717-11456  | -2.31112    | AT2G29640.1               | JOSEPHIN-like protein                                                                                   |
| MDP00002041771 | MDC012934.235:1022-17184  | 1.97977     | AT2G22250.2               | AAT.ATAAT.MEE17                                                                                         |
| MDP0000297676  | MDC012951.271:9076-10542  | 1.79769+308 | AT5G20230.1               | aspartate aminotransferase                                                                              |
| MDP0000543204  | MDC012957.285:314-3413    | 1.79769+308 |                           | Halocidal dehalogenase-like hydrolase (HAD) superfamily protein                                         |
| MDP0000141463  | MDC012987.400:9772-11178  | -3.00214    | AT1G10200.1               | WLIM1                                                                                                   |
| MDP0000322416  | MDC013003.189:92143-92977 | 1.79769+308 | AT5G16360.1               | GATA type zinc finger transcription factor family protein                                               |
| MDP0000297138  | MDC013044.213:3080-8904   | 1.79769+308 | AT4G33580.1               | NC domain-containing protein-related                                                                    |
| MDP0000744506  | MDC013064.706:8737-8927   | 1.79769+308 | AT4G33580.1               | beta carboxyl anhydrase 5                                                                               |
| MDP0000217000  | MDC013070.55:428-5946     | -4.65078    | AT1G58050.1               | RNA helicase family protein                                                                             |
| MDP0000295565  | MDC013084.249:842-11955   | 1.79769+308 | AT5G59890.1               | Gln:ubiquitin-requiring factor protein                                                                  |
| MDP0000198406  | MDC013085.232:856-1627    | 1.74151     | AT4G03510.1               | Protein of unknown function (DUF1637)                                                                   |
| MDP0000943292  | MDC013096.127:30413-30872 | 3.16275     | AT2G47485.1               | RING membrane-anchor 1                                                                                  |
| MDP0000298575  | MDC013096.127:5650-13638  | 1.79769+308 | AT1G68190.1               |                                                                                                         |
| MDP0000298767  | MDC013101.424:1874-8337   | 1.79769+308 | AT5G13020.1               | B-box zinc finger family protein                                                                        |
| 0              | MDC013104.683:2153-2490   | 1.79769+308 |                           | Emy N Terminus (ENT) plant Tudor-like domains-containing protein                                        |
| MDP0000391210  | MDC013104.680:7020-7701   | 1.79769+308 | NHL3                      | NHL3                                                                                                    |
| MDP0000298031  | MDC013115.223:1700-1934   | 1.79769+308 | AT4G19210.1               | RNase I/II-like 3                                                                                       |
| MDP0000297983  | MDC013124.81:6887-8946    | -2.2684     | ATRLI2.RLI2               | RNAse I inhibitor protein 2                                                                             |
| MDP0000775613  | MDC013128.283:1039-38537  | 2.59035     | ATCOL2.COL2               | CONSTANS-like 2                                                                                         |
| MDP0000729348  | MDC013141.176:13225-14599 | 1.79769+308 | AT3G48180.1               | Late embryogenesis abundant protein (LEA) family protein                                                |
| MDP0000294360  | MDC013237.128:1097-2970   | 1.96755     | AT3G48180.1               |                                                                                                         |
| MDP0000746564  | MDC013254.184:20565-22846 | 1.79769+308 | ATL3                      | RING-U-box superfamily protein                                                                          |
| MDP0000216005  | MDC013252.274:11595-11880 | 4.44723     | AT5G28770.2               | bZIP transcription factor family protein                                                                |
| MDP0000770800  | MDC013293.150:1319-7088   | 1.85566     | AT3G20590.1               | AtbZIP63.BZO2H3                                                                                         |
| MDP0000552625  | MDC013293.259:4365-6445   | 1.79769+308 | ATOMT1.OMT1               | O-methyltransferase 1                                                                                   |
| MDP0000251667  | MDC013317.553:6374-6980   | 2.19849     | ATOMT1.OMT1               | O-methyltransferase 1                                                                                   |
| MDP0000297541  | MDC013322.286:4646-5170   | -3.45586    | SRPK4                     | serine/threonine protein kinase 4                                                                       |
| MDP0000296910  | MDC013323.310:3396-3941   | 2.23861     | AT4G10810.1               | Calcium-dependent lipase-binding (CaLB domain) family protein                                           |
| MDP0000309613  | MDC013342.82:9231-9119    | 2.22965     | AT3G2740.1                | flavodoxin like quinone reductase 1                                                                     |
| 0              | MDC013340.296:1896-2851   | 2.15177     | AT5G6900.1                | Disease resistance protein (CC-NBS-LRR class) family                                                    |
| MDP0000879254  | MDC013370.129:3544-3757   | 1.79769+308 | AT5G27740.1               | EMB161.EMB251.EMB2775.RF                                                                                |
| MDP0000321244  | MDC013391.281:2664-5545   | -2.72681    | RCA                       | ATPase family associated with various cellular activities (AAA) rubisco activase                        |
| MDP0000127750  | MDC013396.400:1704-2232   | 1.79769+308 | AT5G06280.1               |                                                                                                         |
| MDP0000791483  | MDC013398.12:1975-2220    | 1.79769+308 | AT5G05780.1               | AE3.ATHMOV34.RPN8A                                                                                      |
| 0              | MDC013436.578:2-321       | 4.86954     |                           | RP non-ATPase subunit 8A                                                                                |
| MDP0000197294  | MDC013447.197:2467-3134   | -2.37931    | ZCF37                     | ZCF37                                                                                                   |
| MDP0000330267  | MDC013483.919:9906-10138  | 1.79769+308 | AT1G51720.1               | Amino acid dehydrogenase family protein                                                                 |
| MDP0000242107  | MDC013483.920:693-11036   | 1.79769+308 | AT3G21295.1               | Tubulin-Pi/W-Pi/NBT superfamily protein                                                                 |
| MDP0000240424  | MDC013503.290:1841-10868  | -3.89521    | PBP1                      | pinacid-binding protein 1                                                                               |
| MDP0000202103  | MDC013530.341:3610-9556   | 2.12598     | DGL1                      | dolichyl-diphosphooligosaccharide-protein glycosyltransferase 48kDa subunit family protein              |
| 0              | MDC013531.194:13169-13505 | -1.68373    | PIP2D. PIP2.5             | plasma membrane intrinsic protein 2.5                                                                   |
| MDP0000129558  | MDC013560.287:995-1943    | 2.54815     | BPS1                      | Protein of unknown function (DUF793)                                                                    |
| MDP0000278612  | MDC013694.297:8579-8946   | -2.19876    | PET1                      | plastocyanin 1                                                                                          |
| MDP0000295511  | MDC013737.149:3234-48180  | -2.49478    | AGT1                      | Argonate family protein                                                                                 |
| MDP0000293269  | MDC013748.450:1014-3320   | -2.4209     | AT1G23740.1               | Oxidoreductase, zinc-binding dehydrogenase family protein                                               |
| 0              | MDC013772.153:26501-26780 | 1.79769+308 |                           |                                                                                                         |
| MDP0000292908  | MDC013792.490:2156-2412   | 1.79769+308 | AT1G11300.1               | protein serine/threonine kinases;protein kinases;ATP binding;sugar binding;kinases;carbohydrate binding |
| MDP0000613481  | MDC013811.289:5939-6141   | 1.79769+308 | AT3G11620.2               | protein serine/threonine kinases;protein kinases;ATP binding;sugar binding;kinases;carbohydrate binding |
| 0              | MDC013818.335:4169-4688   | 3.85997     | AT-SYR1.ATSYP121.ATSYR1.1 | synaptin of plants 121                                                                                  |
| MDP0000852436  | MDC013883.433:28953-29243 | 1.79769+308 | NLP1. ATNLP1. CPA         | nitrilase-like protein 1                                                                                |
| MDP0000801806  | MDC013898.320:3711-4586   | 1.93167     | AT4G14305.1               | Peroxisomal membrane 22 kDa (Mpv17/PMP22) family protein                                                |
| MDP0000300051  | MDC013941.232:17328-17757 | 1.79769+308 | AT2G44310.1               | Calcium-binding EF-hand family protein                                                                  |
| 0              | MDC013941.240:13812-14241 | 1.79769+308 | AT2G44310.1               | Calcium-binding EF-hand family protein                                                                  |
| 0              | MDC013955.368:6283-6564   | 1.78501     |                           |                                                                                                         |
| 0              | MDC013969.325:6821-6931   | 1.79769+308 |                           |                                                                                                         |
| MDP0000321180  | MDC013970.243:6073-9465   | -2.361      | AT4G27310.1               | B-box type zinc finger family protein                                                                   |
| MDP0000328448  | MDC013970.243:6073-9465   | -2.18489    |                           |                                                                                                         |
| 0              | MDC014001.354:28948-29441 | 3.47093     |                           |                                                                                                         |
| MDP0000199273  | MDC014010.337:25823-32224 | 3.30595     | AT1G70710.1               | ATGH9B1.CEL1.GH9B1                                                                                      |
| MDP0000232028  | MDC014064.227:18740-19212 | 1.79769+308 | AT4G14290.1               | q/cycosyl hydrolase 9B1                                                                                 |
| MDP0000299402  | MDC014069.193:12100-15622 | 1.98623     | FPS1                      | alpha/beta-Hydrolases superfamily protein                                                               |
| 0              | MDC014100.85:6143-6452    | 1.79769+308 |                           | farnesyl diphosphate synthase 1                                                                         |
| MDP0000295950  | MDC014142.468:6824-9069   | -2.19289    | ALF5                      | MATE eflux protein                                                                                      |
| MDP0000394638  | MDC014145.337:859-1071    | 1.79769+308 | AT1G68320.1               | AIMYB62.BW62B.BW62C.MYB                                                                                 |
| MDP0000151848  | MDC014183.458:6588-6948   | 1.79769+308 |                           | myb domain protein 62                                                                                   |
| MDP0000151871  | MDC014183.335:19493-19720 | 1.79769+308 | AT4G38960.1               | B-box type zinc finger family protein                                                                   |
| MDP0000380032  | MDC014189.230:1500-31751  | 1.79769+308 | ATPAP29.PAP29             | B-type acid phosphatase 29                                                                              |
| MDP0000296890  | MDC015008.179:340-1209    | 1.79769+308 | ATG09270.1                | glutathione S-transferase TAU 8                                                                         |
| 0              | MDC015025.46:19239-23920  | 2.28703     | AT5G64010.1               |                                                                                                         |
| MDP0000242554  | MDC015077.305:4104-4809   | 1.79769+308 | CYP76C2                   | cytochrome P450, family 76, subfamily C, polypeptide 2                                                  |
| MDP0000128423  | MDC015092.88:5088-9340    | 2.73401     | ATMYC2.JAI1.JIN1.MYC2.RD2 | Basic helix-loop-helix (bHLH) DNA-binding family protein                                                |
| MDP0000537361  | MDC015104.166:2087-5923   | 2.28599     | AT2G04095.1               | Alpha/beta hydrolase related protein                                                                    |
| 0              | MDC015142.537:14989-16316 | -1.39589    | GER2                      | NAD(P)-binding Rossmann-fold superfamily protein                                                        |
| MDP0000141470  | MDC015146.108:31720-32772 | -1.98175    | FLA7                      | FASCICLIN-like arabinogalactan 7                                                                        |
| MDP0000199052  | MDC015208.187:15605-15861 | 1.79769+308 | EER4.TAF12B               | Transcription initiation factor TFIID subunit A                                                         |
| MDP0000886138  | MDC015262.201:26347-28588 | 1.79769+308 | AT3G12170.1               | Chaperone DnaJ-domain superfamily protein                                                               |
| MDP0000128562  | MDC015272.259:4221-4401   | 1.79769+308 | AT3G20502.1               | K+ uptake transporter 3                                                                                 |
| MDP0000292846  | MDC015328.176:6704-8094   | 3.222       | AT2G41380.1               | S-adenosyl-L-methionine-dependent methyltransferases superfamily protein                                |
| MDP0000911067  | MDC015329.200:5868-6237   | 4.48568     | MLP423                    | MLP-like protein 423                                                                                    |
| MDP0000214111  | MDC015334.66:3117-33830   | -2.13953    | CYP716A1                  | cytochrome P450, family 716, subfamily A, polypeptide 1                                                 |
| MDP0000642821  | MDC015370.131:7512-9083   | 2.85117     | AGP16.ATAGP16             | Transducin/WD40 repeat-like superfamily protein                                                         |
| MDP0000804928  | MDC015465.154:6369-6596   | 1.89734     | AT5G50230.1               |                                                                                                         |
| MDP0000211726  | MDC015524.135:32477-32885 | 2.39618     | AT1G29290.1               |                                                                                                         |
| 0              | MDC015555.52:35553-37271  | -3.57441    | AT3G25570.1               | Adenosylmethionine decarboxylase family protein                                                         |
| MDP0000740648  | MDC015598.269:485-888     | 1.79769+308 | AT1G76100.1               | PETE1                                                                                                   |
| MDP0000361550  | MDC015573.110:11769-12270 | -2.10837    |                           | plastocyanin 1                                                                                          |
| MDP0000301453  | MDC015614.99:996-8975     | 2.76432     | AT4G36760.1               | aminopeptidase P1                                                                                       |
| MDP0000926531  | MDC015688.120:16939-18822 | 1.79769+308 | OL12                      | S-adenosyl-L-methionine-dependent methyltransferases superfamily protein                                |
| 0              | MDC015710.110:1669-1846   | 1.79769+308 |                           |                                                                                                         |
| MDP0000622590  | MDC015714.229:27931-31776 | 2.17217     | AT2G41690.1               | AT-HSF33.HSF3B                                                                                          |
| MDP0000511014  | MDC015753.354:8942-11096  | -2.69683    |                           | heat shock transcription factor B3                                                                      |
| 0              | MDC015771.323:788-1107    | 1.79769+308 |                           |                                                                                                         |
| MDP0000305934  | MDC015800.101:15993-16548 | -1.96377    | AT1G31910.1               | GHMP kinase family protein                                                                              |
| MDP0000304497  | MDC015808.201:229-1821    | -2.18938    | AT1G47960.1               | cell wall / vacuolar inhibitor of fructosidase 1                                                        |
| 0              | MDC015817.135:987-1875    | 2.75131     | AT5G38760.1               | Late embryogenesis abundant protein (LEA) family protein                                                |
| MDP0000207654  | MDC015828.56:17681-17876  | 1.79769+308 | AT2G20650.1               | RING-U-box superfamily protein                                                                          |
| MDP0000304369  | MDC015831.96:1977-2271    | -2.01267    | LTP3                      | lipid transfer protein 3                                                                                |
| MDP0000575886  | MDC015856.331:10564-10900 | 1.79769+308 | ATPDAT.PDAT.PDAT1         | phospholipid:diacylglycerol acyltransferase                                                             |
| MDP0000205899  | MDC015861.207:6372-7099   | -3.13665    | AGP16.ATAGP16             | arabingalactan protein 16                                                                               |
| MDP0000214320  | MDC015872.319:12837-13304 | 4.62441     | AT5G42905.1               | Polynucleotidyl transferase, ribonuclease H-like superfamily protein                                    |
| 0              | MDC015872.319:14910-15332 | 1.79769+308 |                           |                                                                                                         |
| MDP0000242922  | MDC015883.197:6246-9638   | 2.11224     | AT5G25560.2               | CHY-type/CTCHY-type/RING-type Zinc finger protein                                                       |
| 0              | MDC015908.225:5190-525    |             |                           |                                                                                                         |

|               |                           |              |             |                             |                                                                                           |
|---------------|---------------------------|--------------|-------------|-----------------------------|-------------------------------------------------------------------------------------------|
| MDP0000230446 | MDC016069.260.8663-10840  | 1.79769e+308 | AT5G32440.3 |                             | Ubiquitin system component Cue protein                                                    |
| MDP0000307358 | MDC016071.225.7688-8061   | 1.79769e+308 | AT5G64940.1 | ATATH13,ATH13,ATOSA1,OS1    | ABC2 homolog 13                                                                           |
| MDP0000603546 | MDC016163.86.1323-5672    | 3.30868      | AT4G17880.1 |                             | Basic helix-loop-helix (bHLH) DNA-binding family protein                                  |
| MDP0000150985 | MDC016175.155.5520-8999   | 1.79769e+308 | AT1G80420.1 | ATXRCC1                     | BRCT domain-containing DNA repair protein                                                 |
| 0             | MDC016234.268.187-19347   | 1.9385       |             |                             |                                                                                           |
| 0             | MDC016234.268.1975-19922  | 1.79769e+308 |             |                             |                                                                                           |
| 0             | MDC016257.132.1244-1326   | 1.79769e+308 | AT5G07050.1 |                             | nodulin MN21/EamA-like transporter family protein                                         |
| 0             | MDC016257.197.16577-16693 | 2.51199      |             |                             |                                                                                           |
| MDP0000214905 | MDC016257.212.5600-8375   | 1.79769e+308 | AT2G38740.1 |                             | Halooxid dehalogenase-like hydrolase (HAD) superfamily protein                            |
| MDP0000151417 | MDC016323.148.1568-3293   | -3.4835      | AT3G25570.1 |                             | Adenosylmethionine decarboxylase family protein                                           |
| MDP0000348327 | MDC016409.316.14506-15265 | -1.85887     | AT1G12663.1 |                             |                                                                                           |
| MDP0000332786 | MDC016470.67.22850-23923  | 3.16876      | AT5G04200.1 | AIMC9,MC9                   | metacaspase 9                                                                             |
| MDP0000332786 | MDC016470.67.24078-24292  | 1.79769e+308 | AT5G04200.1 | AIMC9,MC9                   | metacaspase 9                                                                             |
| 0             | MDC016479.97.23574-23902  | 1.79769e+308 |             |                             |                                                                                           |
| MDP0000432402 | MDC016525.50.1237-1421    | 1.79769e+308 | AT5G38830.1 |                             | Cysteine <sup>5</sup> -tRNA synthetase, class Ia family protein                           |
| MDP0000303139 | MDC016572.135.2036-13919  | 2.64572      | AT5G13560.1 |                             |                                                                                           |
| 0             | MDC016588.101.11842-12103 | 1.79769e+308 |             |                             |                                                                                           |
| MDP0000243237 | MDC016615.207.310-1511    | 1.79769e+308 | AT5G17820.1 |                             | Peroxidase superfamily protein                                                            |
| MDP0000903267 | MDC016626.388.1735-2929   | -1.99629     | AT2G37400.1 |                             | Tetratricopeptide repeat (TPR)-like superfamily protein                                   |
| 0             | MDC016663.136.1126-1407   | 1.79769e+308 |             |                             |                                                                                           |
| MDP0000817718 | MDC016670.201.4492-4801   | 1.79769e+308 | AT5G63610.1 | ATCDK8,CDKE1,1;HEN3         | cyclin-dependent kinase E.1                                                               |
| MDP0000206461 | MDC016676.357.6049-7681   | -2.02641     | AT5G50790.1 |                             | Nodulin MN3 family protein                                                                |
| 0             | MDC016716.178.15966-16452 | -1.91239     |             |                             |                                                                                           |
| 0             | MDC016737.180.344-544     | 1.79769e+308 |             |                             |                                                                                           |
| 0             | MDC016762.98.221-475      | 1.79769e+308 |             |                             |                                                                                           |
| MDP0000213265 | MDC016787.195.6162-9680   | 1.79769e+308 | AT1G07960.1 | ATPDL5-1,PDLS-1             | PDH-like 5-1                                                                              |
| MDP0000356415 | MDC016842.248.4052-4349   | 1.79769e+308 |             |                             |                                                                                           |
| MDP0000823528 | MDC016855.631.39541-39971 | -1.94464     | AT4G27360.1 |                             | Dynein light chain type 1 family protein                                                  |
| MDP0000828077 | MDC016904.89.2263-15477   | 2.31888      | AT4G01470.1 | AT1TIP1.3,GAMMA-TIP3,TIP1.3 | topogast intrinsic protein 1.3                                                            |
| MDP0000307237 | MDC016923.355.240-870     | 1.94868      | AT3G21760.1 |                             | UDP-Glucosyltransferase superfamily protein                                               |
| MDP0000389969 | MDC016942.263.1081-1165   | 1.79769e+308 | AT4G35260.1 | IDH1,IDH1                   | isocitrate dehydrogenase 1                                                                |
| MDP0000923628 | MDC016948.79.12312-12459  | -1.87881     | AT3G57062.1 |                             |                                                                                           |
| MDP0000213179 | MDC016970.176.123-435     | -2.08908     | AT5G65730.1 | XTH6                        | xyloglucan endotransglucosylase/hydrolase 6                                               |
| 0             | MDC017013.566.1819-2228   | 1.79769e+308 | AT2G45220.1 |                             | Plant invertase/pectin methyltransferase inhibitor superfamily                            |
| 0             | MDC017013.566.2476-470    | 1.79769e+308 | AT2G45220.1 |                             | Plant invertase/pectin methyltransferase inhibitor superfamily                            |
| 0             | MDC017013.566.514-1355    | 1.79769e+308 | AT2G45220.1 |                             | Plant invertase/pectin methyltransferase inhibitor superfamily                            |
| 0             | MDC017021.252.2034-20684  | 1.79769e+308 |             |                             |                                                                                           |
| MDP0000304470 | MDC017033.58.322-2820     | 2.05019      | AT3G68654.1 |                             | Cyclophilin-like peptidyl-prolyl cis-trans isomerase family protein                       |
| MDP0000307402 | MDC017035.467.27408-27827 | 3.78787      | AT1G12650.1 |                             |                                                                                           |
| MDP0000244499 | MDC017051.225.1369-1750   | 2.02915      | AT5G42260.1 | BGLU12                      | beta glucosidase 12                                                                       |
| MDP0000215541 | MDC017065.233.1015-1592   | 1.79769e+308 |             |                             |                                                                                           |
| MDP0000308097 | MDC017091.105.21457-21821 | 1.79769e+308 | AT2G04220.1 |                             | Plant protein of unknown function (DUF868)                                                |
| MDP0000507003 | MDC017117.184.9382-10816  | 2.94928      | AT2G25060.1 | AIENODL14,ENODL14           | early nodulin-like protein 14                                                             |
| 0             | MDC017130.237.1246-1897   | 4.57898      | AT1G18390.2 |                             | Protein kinase superfamily protein                                                        |
| 0             | MDC017130.237.6870        | 1.79769e+308 |             |                             |                                                                                           |
| MDP0000252890 | MDC017137.174.6376-7583   | -2.13152     | AT5G38410.1 |                             | Ribulose biphosphate carboxylase (small chain) family protein                             |
| MDP0000243529 | MDC017153.343.11521-14215 | -2.09166     | AT2G32670.1 | ATVAMP725,VAMP725           | vesicle-associated membrane protein 725                                                   |
| MDP0000513140 | MDC017154.657.12553-12769 | 1.79769e+308 | AT1G51190.1 | PLT2                        | Integrase-type DNA-binding superfamily protein                                            |
| MDP0000351526 | MDC017237.222.14315-14834 | -3.5073      | AT2G45180.1 |                             | Bifunctional inhibitor/lipid-transfer protein/seed storage 2S albumin superfamily protein |
| MDP0000301189 | MDC017251.289.4484-5683   | 1.79769e+308 | AT2G39490.1 |                             | F-box family protein                                                                      |
| 0             | MDC017263.315.11030-11368 | 1.79769e+308 |             |                             |                                                                                           |
| MDP0000233640 | MDC017324.278.8810-20137  | 7.32266      | AT1G06720.1 |                             | P-loop containing nucleoside triphosphate hydrolases superfamily protein                  |
| MDP0000215301 | MDC017325.138.24398-26864 | 1.79769e+308 | AT5G63060.1 |                             | Sec14-like phosphatidylinositol transfer family protein                                   |
| MDP0000755770 | MDC017371.127.20493-20837 | 1.79769e+308 |             |                             |                                                                                           |
| MDP0000755770 | MDC017371.127.21062-21293 | 1.79769e+308 |             |                             |                                                                                           |
| 0             | MDC017405.92.18343-18890  | -1.91427     |             |                             |                                                                                           |
| MDP0000302905 | MDC017443.214.7327-8900   | 1.79769e+308 | AT5G13930.1 | ATCHS,CHS,TT4               | Chalcone and stilbene synthase family protein                                             |
| 0             | MDC017450.136.8789-9531   | 1.79769e+308 | AT3G16340.2 | PDR1                        | halotolerant drug resistance 1                                                            |
| 0             | MDC017540.252.4477-45439  | 1.79769e+308 | AT4G20620.1 |                             | FAD-binding Berberine family protein                                                      |
| 0             | MDC017562.408.111-463     | 2.53993      |             |                             |                                                                                           |
| MDP0000206473 | MDC017564.90.2113-2470    | 4.62132      | AT1G51920.1 |                             | histone H2A 7                                                                             |
| MDP0000935120 | MDC017578.59.5707-6257    | -2.69309     | AT5G27670.1 | HTA7                        |                                                                                           |
| MDP0000696497 | MDC017597.315.14051-19216 | 2.53574      | AT5G53110.1 |                             | RING/U-box superfamily protein                                                            |
| MDP0000214697 | MDC017636.116.419-6265    | 2.00073      | AT2G28690.1 |                             | Protein of unknown function (DUF1635)                                                     |
| 0             | MDC017703.193.3809-3712   | 1.79769e+308 |             |                             |                                                                                           |
| MDP0000208899 | MDC017766.81.3875-5414    | 1.79769e+308 | AT5G13930.1 | ATCHS,CHS,TT4               | Chalcone and stilbene synthase family protein                                             |
| 0             | MDC017818.70.8691-8779    | 1.79769e+308 |             |                             |                                                                                           |
| MDP0000130060 | MDC017831.366.8068-8826   | 1.79769e+308 | AT5G54580.1 |                             | RNA-binding (RRM/RBD/RNP motifs) family protein                                           |
| MDP0000208137 | MDC017843.86.3131-7274    | 3.95473      | AT3G22560.1 | MDG25, GdS2                 | galactinol synthase 2                                                                     |
| MDP0000492382 | MDC017850.196.7405-7687   | 1.79769e+308 | AT3G53000.1 | AIPP2-A15,PP2-A15           | Protein of unknown function, DUF617                                                       |
| MDP0000305335 | MDC017850.205.5561-9559   | -1.74673     | AT2G21990.1 |                             | Protein of unknown function, DUF617                                                       |
| MDP0000243861 | MDC017880.286.5763-5960   | 1.79769e+308 | AT2G28930.3 | APK1B,PK1B                  | protein kinase 1B                                                                         |
| MDP0000708692 | MDC017895.316.14102-16075 | 1.79769e+308 | AT2G38470.1 | ATWRKY33,WRKY33             | WRKY DNA-binding protein 33                                                               |
| 0             | MDC017935.299.4662-5032   | 4.08188      | AT1G30700.1 |                             | FAD-binding Berberine family protein                                                      |
| 0             | MDC018035.72.1243-1306    | -2.78512     |             |                             |                                                                                           |
| MDP0000261968 | MDC018046.125.7237-81764  | 3.09387      | AT3G07790.1 |                             | DGCR14-related                                                                            |
| MDP0000306151 | MDC018097.432.5006-5477   | 6.62325      | AT2G23270.1 |                             | amino acid permease 8                                                                     |
| 0             | MDC018101.293.13762-13915 | 1.79769e+308 | AT1G10010.1 | AAP8,ATAAP8                 | Protein of unknown function (DUF581)                                                      |
| MDP0000732088 | MDC018107.153.1030-1431   | 2.51332      | AT5G13930.1 | ATWRKY75,WRKY75             | Protein kinase family protein with ARM repeat domain                                      |
| MDP0000302888 | MDC018131.78.74830-75022  | 1.79769e+308 | AT2G4730.1  |                             | DUF679 domain membrane protein 2                                                          |
| MDP0000623836 | MDC018185.243.10459-11068 | 2.77536      | AT3G21550.1 | MDIMP2,DIMP2                |                                                                                           |
| 0             | MDC018197.265.11208-11227 | 1.79769e+308 |             |                             |                                                                                           |
| MDP0000794439 | MDC018238.148.9568-11586  | 2.03383      | AT1G80940.1 | ATWRKY40,WRKY40             | WRKY DNA-binding domain                                                                   |
| MDP0000200727 | MDC018262.284.13539-14255 | 1.79769e+308 | AT3G22560.1 |                             | Acyl-CoA N-acyltransferases (NAT) superfamily protein                                     |
| MDP0000210067 | MDC018268.357.14874-17694 | 2.03795      | AT2G14095.1 |                             |                                                                                           |
| MDP0000442718 | MDC018328.126.1463-1767   | 1.79769e+308 | AT4G14145.1 |                             |                                                                                           |
| 0             | MDC018333.136.493-815     | 1.79769e+308 |             |                             |                                                                                           |
| 0             | MDC018344.87.12851-13103  | 1.79769e+308 |             |                             |                                                                                           |
| MDP0000307191 | MDC018367.267.12775-13673 | 4.45646      | AT3G20840.1 | PLT1                        | Integrase-type DNA-binding superfamily protein                                            |
| 0             | MDC018370.363.15975-16396 | 1.79769e+308 |             |                             |                                                                                           |
| 0             | MDC018385.173.5099-5375   | 1.79769e+308 |             |                             |                                                                                           |
| MDP0000307797 | MDC018399.342.13517-13812 | 2.72922      | AT1G23880.1 |                             | NHL domain-containing protein                                                             |
| MDP0000244125 | MDC018407.210.85-8962     | 1.79769e+308 | AT1G01710.1 |                             | Acyl-CoA thioesterase family protein                                                      |
| MDP0000130449 | MDC018419.403.1057-2419   | 1.87905      | AT5G13610.1 | CYP716A1                    | cytochrome P450, family 716, subfamily A, polypeptide 1                                   |
| MDP0000689946 | MDC018430.130.8323-8938   | 2.19853      | AT5G47220.1 | ATERF-2,ATERF2,ERF2         | ethylene response element binding factor 2                                                |
| MDP0000152589 | MDC018440.197.73746-74343 | -3.28078     | AT5G52190.1 |                             | Suaar isomerase (SIS) family protein                                                      |
| MDP0000341297 | MDC018445.308.1656-1818   | 1.79769e+308 |             |                             |                                                                                           |
| 0             | MDC018495.75.656-1593     | 2.5851       | AT2G46150.1 |                             | Late embryogenesis abundant (LEA) hydroxyproline-rich glycoprotein family                 |
| MDP0000905987 | MDC018501.311.3900-4131   | 1.79769e+308 | AT4G20310.1 | ATRMA1,RMA1                 | RING membrane-anchored 1                                                                  |
| MDP0000212954 | MDC018507.307.11511-11932 | 1.79769e+308 | AT1G70670.1 |                             | Calcium-related family protein                                                            |
| MDP0000789174 | MDC018519.270.8935-7074   | 2.55974      | AT1G24020.1 | MLP423                      | MLP-like protein 423                                                                      |
| MDP0000569487 | MDC018527.183.1987-3563   | 1.79769e+308 |             |                             |                                                                                           |
| 0             | MDC018532.136.875-1203    | 1.79769e+308 | AT4G25340.2 | FKBP53                      | FK506 BINDING PROTEIN 53                                                                  |
| MDP0000626471 | MDC018583.121.765-1036    | 1.79769e+308 | AT1G72040.1 |                             | P-loop containing nucleoside triphosphate hydrolases superfamily protein                  |
| MDP0000210867 | MDC018599.370.2113-2425   | 1.79769e+308 |             |                             |                                                                                           |
| MDP0000260882 | MDC018600.265.28896-33820 | 1.97082      |             |                             |                                                                                           |
| MDP0000207774 | MDC018610.106.7849-8953   | -1.84235     | AT3G20820.1 |                             | Leucine-rich repeat (LRR) family protein                                                  |
| MDP0000300795 | MDC018638.210.32488-32798 | 1.79769e+308 | AT1G76710.1 | ASHH1,SDG26                 | SET domain group 26                                                                       |
| 0             | MDC018683.391.5370-5442   | 1.79769e+308 |             |                             |                                                                                           |
| MDP0000206239 | MDC018755.93.19644-21164  | -2.26016     | AT2G18840.1 |                             | Integral membrane Yip1 family protein                                                     |
| 0             | MDC018763.284.10-79       | 1.79769e+308 |             |                             |                                                                                           |
| MDP0000255006 | MDC018763.300.9907-13402  | 1.79769e+308 | AT3G01720.1 |                             |                                                                                           |
| MDP0000302026 | MDC018797.53.4472-4733    | -2.17361     |             |                             |                                                                                           |
| 0             | MDC018803.242.11-340      | 2.78501      |             |                             |                                                                                           |
| MDP0000306963 | MDC018808.231.3422-3614   | 1.79769e+308 | AT1G09630.1 | ATRAB-A2A,ATRAB11C,ATRAL    | RAB GTPase 11C                                                                            |
| MDP0000523487 | MDC018812.25.154-3502     | 1.93781      | AT3G55120.1 | AT1,CF1,TT5                 | Chalcone-flavanone isomerase family protein                                               |
| MDP0000782882 | MDC018829.211.2566-3010   | 2.05088      |             |                             |                                                                                           |
| 0             | MDC018888.178.25373-25918 | 2.18952      | AT1G01490.2 |                             | Heavy metal transport/detoxification superfamily protein                                  |
| 0             | MDC018888.178.4311-4783   | 1.79769e+308 |             |                             |                                                                                           |
| MDP0000304278 | MDC018864.196.3981-5846   | 1.79769e+308 | AT3G52040.1 |                             | VO motif-containing protein                                                               |
| MDP0000130738 | MDC018913.57.3010-3796    | 1.79769e+308 | AT1G68450.1 |                             |                                                                                           |
| MDP0000215667 | MDC018916.143.5252-7355   | 1.79769e+308 |             |                             |                                                                                           |
| MDP0000210595 | MDC018926.465.12630-16290 | 2.28894      | AT1G03110.1 |                             | Transducin/WVD40 repeat-like superfamily protein                                          |
| MDP0000304459 | MDC018928.465.829-2636    | 1.49862      | AT4G20310.1 |                             | RING membrane-anchored 1                                                                  |
| MDP0000211459 | MDC018944.121.4842-6638   | 1.79769e+308 | AT1G19850.1 | ARF5,IAA24,MP               | Transcription factor B3 family protein / auxin-responsive factor AUX/IAA-related          |
| MDP0000921319 | MDC018952.103.18233-18583 | -4.80994     | AT2G10940.1 |                             | Bifunctional inhibitor/lipid-transfer protein/seed storage 2S albumin superfamily protein |
| MDP0000921319 | MDC018952.103.19128-19710 | -4.48923     | AT2G10940.1 |                             | Bifunctional inhibitor/lipid-transfer protein/seed storage 2                              |

|               |                           |              |              |                                      |                                                                                            |
|---------------|---------------------------|--------------|--------------|--------------------------------------|--------------------------------------------------------------------------------------------|
| MDP0000827820 | MDC019270.183.15826-16306 | 4.71788      | AT1G24020.1  | MLP423                               | MLP-like protein 423                                                                       |
| 0             | MDC019296.227.19299-19915 | -1.86788     |              |                                      |                                                                                            |
| 0             | MDC019305.85.5690-5943    | 1.79769e+308 |              |                                      |                                                                                            |
| MDP0000143208 | MDC019350.189.9254-9942   | 1.79769e+308 | AT5G08130.2  | BIM1                                 | basic helix-loop-helix (bHLH) DNA-binding superfamily protein                              |
| MDP0000221184 | MDC019388.422.2599-3308   | 1.79769e+308 | AT5G36930.2  |                                      | Disease resistance protein (TIR-NBS-LRR class) family                                      |
| MDP0000508081 | MDC019411.248.5935-6349   | 1.79769e+308 | AT2G44310.1  |                                      | Calcium-binding EF-hand family protein                                                     |
| MDP0000696624 | MDC019411.260.1762-2191   | 1.79769e+308 | AT2G44310.1  |                                      | Calcium-binding EF-hand family protein                                                     |
| MDP0000310308 | MDC019445.155.6053-6213   | 1.79769e+308 | AT2G06000.1  |                                      | Pentapeptide repeat (PPR) superfamily protein                                              |
| MDP0000322237 | MDC019483.102.3700-11010  | 1.79769e+308 | AT5G54570.1  | BGLU41                               | beta glucosidase 41                                                                        |
| MDP0000329499 | MDC019532.134.1732-17472  | 2.48902      |              |                                      |                                                                                            |
| MDP0000808038 | MDC019575.15.12756-12778  | 2.06399      | AT1G37340.1  |                                      | UDP-Glycosyltransferase superfamily protein                                                |
| MDP0000261679 | MDC019580.344.3704-9984   | 3.62236      | AT5G26340.1  | ATSTP13,MSS1,STP13                   | Major facilitator superfamily protein                                                      |
| 0             | MDC019583.195.2352-2815   | 2.75015      | AT2G37760.1  |                                      | NAD(P)-linked oxidoreductase superfamily protein                                           |
| 0             | MDC019583.195.3051-3246   | 2.41451      | AT2G3770.2   |                                      | NAD(P)-linked oxidoreductase superfamily protein                                           |
| MDP0000449901 | MDC019585.197.5929-9189   | 2.48902      | AT1G19300.1  |                                      | glyoxal oxidase-related protein                                                            |
| MDP0000449901 | MDC019585.197.6197-7127   | 1.92507      | AT1G19300.1  |                                      | glyoxal oxidase-related protein                                                            |
| MDP0000315936 | MDC019603.257.26665-27463 | 1.79769e+308 | AT4G24990.1  | ATGP4                                | Ubiquitin family protein                                                                   |
| MDP0000311438 | MDC019656.167.25590-27856 | 1.79769e+308 | AT2G03620.1  | MGT3,MRS2-5                          | magnesium transporter 3                                                                    |
| MDP0000218810 | MDC019661.283.3225-4682   | 4.53059      | AT4G10490.1  |                                      | 2-oxoglutarate (2OG) and Fe(II)-dependent oxygenase superfamily protein                    |
| 0             | MDC019710.194.14179-14423 | 2.21243      |              |                                      |                                                                                            |
| MDP0000244775 | MDC019719.227.864-1022    | 1.79769e+308 | AT2G19330.1  | P1RL6                                | plant intracellular ras group-related LRR 6                                                |
| MDP0000230601 | MDC019748.161.5809-7542   | -2.15226     | AT1G19000.1  |                                      | Homeodomain-like superfamily protein                                                       |
| 0             | MDC019868.260.1962-2259   | 1.79769e+308 |              |                                      |                                                                                            |
| MDP0000218699 | MDC019865.222.5870-6995   | 2.2786       | AT1G75000.1  |                                      | Pathogenesis-related thaumatin superfamily protein                                         |
| MDP0000362302 | MDC019899.224.2519-2912   | 1.98336      | AT4G14890.1  |                                      | 2Fe-2S ferredoxin-like superfamily protein                                                 |
| MDP0000593249 | MDC020032.306.1846-8801   | -1.28641     | AT2G32300.1  | UCC1                                 | uclaycin 1                                                                                 |
| 0             | MDC020082.132.384-673     | 1.79769e+308 |              |                                      |                                                                                            |
| 0             | MDC020082.224.15608-15824 | 1.79769e+308 | AT1G66950.1  | PDR11, ATPDR11                       | pleiotropic drug resistance 11                                                             |
| 0             | MDC020082.224.16228-16490 | 1.79769e+308 | AT2G36380.1  | PDR6, ATPDR6                         | pleiotropic drug resistance 6                                                              |
| 0             | MDC020082.224.16718-17136 | 1.79769e+308 | AT2G36380.1  | PDR6, ATPDR6                         | pleiotropic drug resistance 6                                                              |
| 0             | MDC020098.119.12808-13292 | 1.79769e+308 | AT3G16340.2  | PDR1                                 | pleiotropic drug resistance 1                                                              |
| MDP0000412490 | MDC020101.37.12007-12985  | -3.44831     | AT1G56430.1  | ATNAS4,NAS4                          | nicotianamine synthase 4                                                                   |
| MDP0000357039 | MDC020112.161.5075-5343   | 1.79769e+308 |              |                                      |                                                                                            |
| MDP0000705053 | MDC020153.98.3960-4787    | 2.38023      | AT1G48320.1  |                                      | Thioesterase superfamily protein                                                           |
| MDP0000705053 | MDC020153.98.5120-5424    | 1.79769e+308 | AT1G48320.1  |                                      | Thioesterase superfamily protein                                                           |
| MDP0000805832 | MDC020185.100.13522-14211 | -2.15482     | AT5G08050.1  |                                      | Protein of unknown function (DUF1118)                                                      |
| 0             | MDC020190.132.475-670     | 1.79769e+308 |              |                                      |                                                                                            |
| MDP0000312316 | MDC020206.60.19611-29042  | 6.42087      | AT1G10510.1  | emb2004                              | RNI-like superfamily protein                                                               |
| 0             | MDC020206.60.80379-80919  | 3.68653      | AT1G348180.1 |                                      | unknown protein                                                                            |
| MDP0000362305 | MDC020215.147.7355-7948   | -1.90332     | AT2G32970.1  | LCR69,PDF2.2                         | low-molecular-weight cysteine-rich 69                                                      |
| MDP0000253928 | MDC020235.55.5712-6463    | -1.97256     | AT5G64820.1  |                                      |                                                                                            |
| MDP0000351308 | MDC020252.154.3698-3890   | 1.79769e+308 |              |                                      |                                                                                            |
| MDP0000745504 | MDC020314.68.30613-30835  | 1.79769e+308 | AT1G02630.1  |                                      | Nucleoside transporter family protein                                                      |
| MDP0000593536 | MDC020317.187.4775-2264   | 3.7415       | AT2G3690.1   |                                      | 2-oxoglutarate (2OG) and Fe(II)-dependent oxygenase superfamily protein                    |
| MDP0000322725 | MDC020357.143.7539-13113  | 1.98336      | AT4G29010.1  | AIM1                                 | erythro-CoA hydratase/isomerase family                                                     |
| 0             | MDC020381.113.1178-2064   | 1.79769e+308 |              |                                      |                                                                                            |
| MDP0000219404 | MDC020461.201.992-1634    | -3.43143     | AT3G22142.1  |                                      | Bi/functional inhibitor/lipid-transfer protein/seed storage 2S albumin superfamily protein |
| MDP0000366807 | MDC020476.369.154-1863    | 2.415        |              |                                      |                                                                                            |
| MDP0000520189 | MDC020483.205.11374-11570 | 1.79769e+308 | AT3G22310.1  | ETR2                                 | Signal transduction histidine kinase, hybrid-type, ethylene sensor                         |
| MDP0000356161 | MDC020502.79.5346-6108    | 1.79769e+308 | AT3G29970.1  |                                      | B2D protein                                                                                |
| MDP0000356161 | MDC020502.79.6418-6639    | 1.79769e+308 | AT3G29970.1  |                                      | B2D protein                                                                                |
| MDP0000392904 | MDC020542.316.6274-6781   | -1.89038     | AT2G25770.1  |                                      | Phytanoyl cyclase/dehydrase and lipid transport superfamily protein                        |
| MDP0000131822 | MDC020582.164.1549-3880   | 1.79769e+308 | AT4G05100.1  | AIMYB74,MYB74                        | myb domain protein 74                                                                      |
| MDP0000827665 | MDC020641.127.10915-12751 | -1.90145     | AT5G41080.1  |                                      | PLC-like phosphodiesterases superfamily protein                                            |
| MDP0000353639 | MDC020665.95.9842-9750    | 1.79769e+308 |              |                                      |                                                                                            |
| MDP0000831481 | MDC020665.117.8027-6473   | 2.9494       | AT5G14280.1  |                                      | DNA-binding storekeeper protein-related                                                    |
| MDP0000218132 | MDC020684.226.11654-14980 | 1.79769e+308 | AT3G15070.1  |                                      | RING-U-box superfamily protein                                                             |
| MDP0000472203 | MDC020837.138.583-9198    | 2.24942      | AT5G18600.1  |                                      | Thioredoxin superfamily protein                                                            |
| MDP0000311115 | MDC020898.82.16235-16669  | 1.79769e+308 | AT5G51270.1  |                                      | U-box domain-containing protein kinase family protein                                      |
| 0             | MDC020997.87.178-2245     | 1.79769e+308 |              |                                      |                                                                                            |
| MDP0000215799 | MDC021014.157.400-4861    | 1.79769e+308 | AT1G50030.2  | TOR                                  | target of rapamycin                                                                        |
| 0             | MDC021041.235.4758-5058   | 1.79769e+308 |              |                                      |                                                                                            |
| MDP0000143860 | MDC021083.97.4312-4666    | 1.79769e+308 | AT4G15475.1  |                                      | F-box/RN1-like superfamily protein                                                         |
| MDP0000374032 | MDC021107.66.19990-21331  | -2.88031     | AT1G0740.1   | RR23                                 | inorganic carbon transport protein-related                                                 |
| MDP0000217690 | MDC021125.222.7346-8108   | 1.79769e+308 | AT2G32970.1  | ATNHL10,NHL10, YL59                  | Late embryogenesis abundant (LEA) hydroxyproline-rich glycoprotein family                  |
| MDP0000758237 | MDC021125.354.16615-17911 | 3.56375      | AT5G01750.2  |                                      | Protein of unknown function (DUF567)                                                       |
| MDP0000312359 | MDC021195.261.14143-15009 | 2.1252       | AT2G16060.1  | AHB1,ARATH,GLB1,ATGLB1, hemoglobin 1 |                                                                                            |
| 0             | MDC021221.287.44679-45111 | 2.02561      |              |                                      |                                                                                            |
| MDP0000312258 | MDC021224.329.1772-3627   | 1.79769e+308 | AT1G79000.1  | ATHAC-1,ATHPCAT2,HAC1,PC             | histone acetyltransferase of the CBP family 1                                              |
| MDP0000225981 | MDC021224.329.4725-4845   | 1.72527      | AT5G38300.1  | ACYB-1,CYB-1                         | cytochrome B5E1-1                                                                          |
| MDP0000313786 | MDC021229.327.8915-15234  | 1.79769e+308 | AT3G45300.1  | ATIVD,IVD,IVDH                       | isovaleryl-CoA-dehydrogenase                                                               |
| MDP0000222305 | MDC021262.501.3957-14057  | 1.79769e+308 | AT3G15880.2  | TPR4,WIP2                            | WUS-interacting protein 2                                                                  |
| MDP0000221246 | MDC021270.197.3504-5232   | 1.79769e+308 | AT5G06710.1  | HAT14                                | homeobox from Arabidopsis thaliana                                                         |
| MDP0000353721 | MDC021379.127.3833-6939   | 1.79769e+308 | AT1G02840.1  | ATSRP34,SR1,SRP34                    | RNA-binding (RRM/RBD/RNP motifs) family protein                                            |
| MDP0000261935 | MDC021386.436.29757-30095 | 1.79769e+308 |              |                                      |                                                                                            |
| MDP0000217124 | MDC021421.104.11161-11618 | 2.97142      | AT5G27460.1  |                                      | Tetrapeptide repeat (TPR)-like superfamily protein                                         |
| MDP0000142914 | MDC021463.474.2997-5056   | 1.79769e+308 | AT1G77930.1  | MLP243                               | Chaperone DnaJ-domain superfamily protein                                                  |
| MDP0000342233 | MDC021508.119.703-1183    | 2.05401      | AT1G24020.1  | MLP423                               | MLP-like protein 423                                                                       |
| MDP0000336734 | MDC021521.150.2349-23882  | -2.38109     | AT1G78210.1  | MSL6                                 | mechanosensitive channel of small conductance-like 6                                       |
| 0             | MDC021527.347.5167-5551   | -2.40514     |              |                                      |                                                                                            |
| MDP0000221871 | MDC021555.260.3534-3862   | 1.79769e+308 | AT4G20970.1  |                                      | basic helix-loop-helix (bHLH) DNA-binding superfamily protein                              |
| 0             | MDC021563.286.640-1084    | 2.21243      | AT5G37850.3  | SOS4                                 | pfK-like carbohydrate kinase family protein                                                |
| 0             | MDC021563.301.16401-23355 | 2.03305      | AT5G37850.1  | SOS4,SOS4                            | pfK-like carbohydrate kinase family protein                                                |
| MDP0000315449 | MDC021594.1461.4-493      | 4.97147      |              |                                      |                                                                                            |
| 0             | MDC021648.178.15444-17993 | 1.79769e+308 | AT2G26070.1  | RTS1                                 | Protein of unknown function (DUF778)                                                       |
| MDP0000392201 | MDC021658.157.9449-9957   | -2.16656     | AT1G60950.1  | FED A, ATFD2                         | 2Fe-2S ferredoxin-like superfamily protein                                                 |
| MDP0000313454 | MDC021684.90.873-4447     | -2.20956     | AT3G20820.1  |                                      | Leucine-rich repeat (LRR) family protein                                                   |
| MDP0000313454 | MDC021689.441.3965-4557   | 5.51402      | AT1G24020.1  | MLP423                               | MLP-like protein 423                                                                       |
| MDP0000215269 | MDC021689.443.8371-9851   | 4.3114       | AT1G24020.1  | MLP423                               | MLP-like protein 423                                                                       |
| MDP000216907  | MDC021689.444.11887-12520 | 4.4464       | AT1G24020.1  | MLP423                               | MLP-like protein 423                                                                       |
| MDP0000500806 | MDC021689.444.7604-11877  | 1.79769e+308 | AT1G24020.1  | MLP423                               | MLP-like protein 423                                                                       |
| MDP0000576126 | MDC021691.154.2961-7337   | -3.79609     | AT5G38020.1  |                                      | S-adenosyl-L-methionine-dependent methyltransferases superfamily protein                   |
| MDP0000314777 | MDC021716.303.5439-6015   | 3.25986      | AT3G21550.1  | AIDMP2,DMP2                          | DUF679 domain membrane protein 2                                                           |
| MDP0000313600 | MDC021763.143.53-117      | -2.48985     | AT4G37300.1  | ME59                                 | maternal effect embryo arrest 59                                                           |
| MDP0000764876 | MDC021795.40.6148-6790    | -3.43143     | AT3G22142.1  |                                      | Bi/functional inhibitor/lipid-transfer protein/seed storage 2S albumin superfamily protein |
| MDP0000542944 | MDC021813.304.19401-20097 | -1.88806     | AT3G22840.1  | ELIP,ELIP1                           | Chlorophyll A-B binding family protein                                                     |
| MDP0000132431 | MDC021842.102.1393-3748   | -2.43746     | AT4G03210.1  | XTH9                                 | xyloglucan endotransglucosylase/hydrolase 9                                                |
| MDP0000378203 | MDC021843.194.2502-4873   | -2.1428      | AT4G03210.1  | XTH9                                 | xyloglucan endotransglucosylase/hydrolase 9                                                |
| MDP0001132456 | MDC021864.218.4719-5925   | 1.85673      | AT5G42650.1  | AOS,CYP74A,DDE2                      | allene oxide synthase                                                                      |
| MDP0000574556 | MDC021880.120.18168-18768 | 2.79716      | AT5G39670.1  |                                      | Calcium-binding EF-hand family protein                                                     |
| MDP0000142675 | MDC021907.185.4850-5618   | 1.79769e+308 |              |                                      |                                                                                            |
| MDP0000361589 | MDC021912.336.80015-80513 | -2.59832     | AT3G45980.1  | H2B,HTB9                             | Histone superfamily protein                                                                |
| MDP0000309894 | MDC021925.367.9645-18947  | 2.03349      | AT4G34640.1  | ERG9,SQS1                            | squalene synthase 1                                                                        |
| MDP0000312665 | MDC021956.140.1760-30598  | 1.79769e+308 | AT5G0600.1   | UBF12                                | ubiquitin-specific protease 12                                                             |
| MDP0000701077 | MDC022002.97.2723-4463    | -2.10433     | AT1G05850.1  | ATCTL1,CTL1,ELP,ELP1,ERH2            | Chitinase family protein                                                                   |
| MDP0000245720 | MDC022027.142.3660-5484   | 1.79769e+308 | AT1G52800.1  |                                      | 2-oxoglutarate (2OG) and Fe(II)-dependent oxygenase superfamily protein                    |
| MDP0000261346 | MDC022047.116.7935-11907  | -3.22425     | AT2G28900.1  | ATOEP16-1,ATOEP16-1,OE1P1            | outer plastid envelope protein 16-1                                                        |
| MDP0000219282 | MDC022049.136.3911-5363   | -3.07805     | AT3G16520.3  | UGT88A1                              | UDP-glucosyl transferase 88A1                                                              |
| MDP0000216076 | MDC022049.144.1863-2445   | -2.8847      | AT3G16520.3  | UGT88A1                              | UDP-glucosyl transferase 88A1                                                              |
| 0             | MDC022084.259.9269-9540   | 1.79769e+308 |              |                                      |                                                                                            |
| 0             | MDC022115.179.2130-2784   | 1.76737      | AT5G06320.1  | NHL3                                 | RDR1/HIN1-like 3                                                                           |
| MDP0000245757 | MDC022126.96.1332-1713    | 3.48619      | AT1G72960.1  |                                      | Root hair defective 3 GTP-binding protein (RHD3)                                           |
| MDP0000309512 | MDC022131.36.462-5980     | 1.79769e+308 | AT5G03290.1  | IDH-V                                | isocitrate dehydrogenase V                                                                 |
| MDP0000389769 | MDC022151.329.8991-9309   | 2.43417      | AT2G37400.1  | ATPAL1,PAL1                          | PhE ammonia lyase 1                                                                        |
| MDP0000132621 | MDC022159.201.1198-1649   | 4.00098      | AT5G43580.1  |                                      | Serine protease inhibitor, potato inhibitor I-type family protein                          |
| MDP0000699845 | MDC022200.129.11651-13693 | 1.90489      |              |                                      |                                                                                            |
| MDP0000309382 | MDC022203.80.8540-9550    | 2.21842      | AT5G13180.1  | ANAC083,NAC083,VNI2                  | NAC domain containing protein 83                                                           |
| MDP0000223410 | MDC022296.98.32919-34391  | 1.79769e+308 | AT5G25170.1  |                                      | PPPDE putative thiol peptidase family protein                                              |
| MDP0000400098 | MDC022327.232.13220-15870 | -2.69487     | AT3G11910.1  | UBP13                                | ubiquitin-specific protease 13                                                             |
| MDP0000328060 | MDC022301.307.90-353      | 1.79769e+308 | AT5G61510.1  |                                      | GrxE5-like zinc-binding alcohol dehydrogenase family protein                               |
| 0             | MDC022363.241.6084-6289   | 1.79769e+308 |              |                                      |                                                                                            |
| 0             | MDC022366.63.24207-24828  | 3.6344       | AT5G13220.4  |                                      |                                                                                            |



|               |                          |              |             |                             |                                                                              |
|---------------|--------------------------|--------------|-------------|-----------------------------|------------------------------------------------------------------------------|
| MDP0000308875 | MDC022879.64:8443-8780   | 1.79769e+308 | AT5G10360.1 | EMB3010, RPS6B              | Ribosomal protein S6e                                                        |
| 0             | MDC022894.374:9989-10324 | 1.79769e+308 |             |                             |                                                                              |
| MDP0000145050 | MDC023085.39:1191-3316   | 1.79769e+308 | AT2G31180.1 | ATMYB14, MYB14, MYB14AT     | myb domain protein 14                                                        |
| MDP0000154734 | MDC023147.45:4964-7678   | 2.37369      | AT5G13080.1 | ATWRKY75, WRKY75            | WRKY DNA-binding protein 75                                                  |
| MDP0000144280 | MDC023308.53:6102-7273   | 1.79769e+308 | AT1G35210.1 |                             |                                                                              |
| MDP0000344130 | MDC023311.35:7749-8338   | 1.72265      |             |                             |                                                                              |
| MDP0000655939 | MDC023492.75:33-679      | 3.53624      | AT3G54420.1 | ATCHITIV, ATEP3, CHIV, EP3  | homolog of carrot EP3-3 chitinase                                            |
| MDP0000310109 | MDC023507.55:3458-7466   | 2.57308      | AT4G01560.1 | MEE49                       | Ribosomal RNA processing Brix domain protein                                 |
| MDP0000824468 | MDC023572.35:3291-4882   | 1.79769e+308 | AT1G02120.1 | VAD1                        | GRAM domain family protein                                                   |
| 0             | MDC023578.53:1279-1667   | -2.75104     |             |                             |                                                                              |
| MDP0000769652 | MDC023607.46:9470-10046  | 4.48219      | AT2G46150.1 |                             | Late embryogenesis abundant (LEA) hydroxyproline-rich glycoprotein family    |
| MDP0000229468 | MDC023757.22:743-2304    | 2.00331      | AT5G36110.1 | CYP716A1                    | cytochrome P450, family 716, subfamily A, polypeptide 1                      |
| MDP0000767063 | MDC023849.16:6797-7283   | 1.79769e+308 | AT1G35210.1 |                             |                                                                              |
| MDP0000390049 | MDC023913.71:5802-6066   | 2.65704      | AT1G34060.1 |                             | Pyridoxal phosphate (PLP)-dependent transferases superfamily protein         |
| MDP0000254078 | MDC024051.25:30601-30826 | 1.79769e+308 | AT5G36080.1 |                             | 2-oxoglutarate (2OG) and Fe(II)-dependent oxygenase superfamily protein      |
| MDP0000316310 | MDC024251.13:2237-3536   | 2.97323      | AT1G78860.1 |                             | D-mannose binding lectin protein with Apple-like carbohydrate-binding domain |
| MDP0000254057 | MDC024467.18:10070-10976 | 1.79769e+308 | AT2G27770.1 |                             | Plant protein of unknown function (DUF868)                                   |
| 0             | MDC024785.32:20131-20658 | 1.79769e+308 |             |                             |                                                                              |
| MDP0000229958 | MDC025025.28:2836-3810   | -4.49642     | AT5G15230.1 | GASA4                       | GAST1 protein homolog 4                                                      |
| MDP0000226405 | MDC025032.16:6902-7125   | 1.79769e+308 | AT1G02400.1 | ATGA20X4, ATGA20X6, DTA1.1  | qabbrellin 2-oxidase 6                                                       |
| MDP0000316472 | MDC025128.19:896-2663    | 1.79769e+308 |             |                             |                                                                              |
| 0             | MDC025179.21:23-403      | 1.79769e+308 |             |                             |                                                                              |
| MDP0000226193 | MDC025338.53:10778-16491 | 1.79769e+308 | AT5G50400.1 | ATPAP27, PAP27              | purple acid phosphatase 27                                                   |
| 0             | MDC025463.22:3749-4156   | -3.07297     |             |                             |                                                                              |
| MDP0000318256 | MDC025619.11:2890-10293  | 1.79769e+308 | AT1G73050.1 |                             | Glucose-methanol-choline (GMC) oxidoreductase family protein                 |
| MDP0000318069 | MDC025702.20:9270-10841  | 2.65117      | AT5G36110.1 | CYP716A1                    | cytochrome P450, family 716, subfamily A, polypeptide 1                      |
| 0             | MDC026144.28:2897-3346   | -1.97344     |             |                             |                                                                              |
| MDP0000229338 | MDC026688.7:88-304       | 2.13927      | AT5G36110.1 | CYP716A1                    | cytochrome P450, family 716, subfamily A, polypeptide 1                      |
| MDP0000316181 | MDC027100.17:2594-7236   | 1.79769e+308 | AT1G51740.1 | ATSYR81, ATUFE1, SYP81, UFE | syntaxin of plants 81                                                        |
| MDP0000133520 | MDC027330.55:6328-8747   | 1.79769e+308 | AT2G28560.1 | PLA1A, PLA2A, PLP2          | phospholipase A 2A                                                           |
| MDP0000228673 | MDC027343.22:8537-10521  | -1.88286     | AT5G25610.1 | ATRD22, RD22                | BURP domain-containing protein                                               |
| 0             | MDC027439.4:1106-2173    | 1.79769e+308 |             |                             |                                                                              |
| 0             | MDC027586.25:17627-18649 | 3.74147      | AT2G46150.1 |                             | Late embryogenesis abundant (LEA) hydroxyproline-rich glycoprotein family    |
| 0             | MDC027586.25:9596-10534  | 3.70896      | AT3G54200.1 |                             | Late embryogenesis abundant (LEA) hydroxyproline-rich glycoprotein family    |
| MDP0000229796 | MDC028034.30:3013-5289   | 1.79769e+308 | AT4G10490.1 |                             | 2-oxoglutarate (2OG) and Fe(II)-dependent oxygenase superfamily protein      |
| MDP0000317816 | MDC029025.16:37724-39632 | -2.22916     | AT5G01600.1 | ATFER1, FER1                | ferretin 1                                                                   |
| MDP0000227827 | MDC029110.8:34469-35629  | -2.14091     | AT2G03550.1 |                             | alpha/beta-Hydrolases superfamily protein                                    |
| MDP0000246508 | MDC029331.22:370-647     | 1.85922      | AT2G15760.1 |                             | Protein of unknown function (DUF1645)                                        |
| MDP0000228456 | MDC029335.25:6007-7048   | 2.82399      |             |                             |                                                                              |
| 0             | MDC029401.45:2819-2642   | 1.79769e+308 |             |                             |                                                                              |
| 0             | MDC029428.27:19524-19555 | 1.79769e+308 |             |                             |                                                                              |
| MDP0000357899 | MDC029522.47:22578-23050 | 1.79769e+308 |             |                             |                                                                              |
| MDP0000390563 | MDC029522.47:26456-26678 | 1.79769e+308 |             |                             |                                                                              |
| 0             | MDC029522.47:28375-29789 | 1.79769e+308 |             |                             |                                                                              |
| MDP0000228257 | MDC029541.17:30025-31667 | -2.98044     |             |                             |                                                                              |
| MDP0000782085 | MDC029683.23:9115-9368   | 4.22898      | AT5G15240.1 |                             | Transmembrane amino acid transporter family protein                          |
| 0             | MDC029690.2:317-603      | 1.79769e+308 | AT3G04720.1 | HELPR-4, PR4                | pathogenesis-related 4                                                       |
| 0             | MDC031150.12:8267-8723   | 1.79769e+308 | AT4G18160.1 | KCO6, ATPK3, ATKCO6, TPK    | Ca <sup>2+</sup> activated outward rectifying K <sup>+</sup> channel 6       |
| MDP0000910895 | MDC031261.10:30690-31071 | 1.79769e+308 | AT5G11970.1 |                             | Protein of unknown function (DUF3511)                                        |
| MDP0000316468 | MDC032201.3:1004-1193    | 1.79769e+308 |             |                             |                                                                              |
| MDP0000227463 | MDC032660.9:5945-14498   | 6.5024       | AT2G21440.1 |                             | RNA-binding (RRM/RBD/RNP motifs) family protein                              |
| MDP0000705797 | MDC034940.5:2269-7814    | -2.70526     | AT4G30430.1 | TET9                        | tetraspanin9                                                                 |
| MDP0000595200 | MDC035405.21:18653-18905 | 1.79769e+308 | AT1G17810.1 | BETA-TIP                    | beta-tongplast intrinsic protein                                             |
| MDP0000661371 | MDC035507.15:17028-17370 | -2.3258      | AT5G59320.1 | LTP3                        | lipid transfer protein 3                                                     |
| MDP0000228904 | MDC035513.7:3794-13224   | 4.85453      | AT3G56400.1 | ATWRKY70, WRKY70            | WRKY DNA-binding protein 70                                                  |
| MDP0000761113 | MDC035533.8:11708-13073  | 2.77336      | AT2G14095.1 |                             |                                                                              |
| MDP0000143463 | MDC035751.16:12042-12657 | 4.53253      | AT4G37290.1 |                             |                                                                              |
| MDP0000143462 | MDC035751.16:9288-9911   | 4.88732      | AT4G37290.1 |                             |                                                                              |
| 0             | MDC036102.13:6186-6377   | 1.79769e+308 |             |                             |                                                                              |
| 0             | MDC036190.10:2148-2600   | 4.37625      |             |                             |                                                                              |
| MDP0000859897 | MDC037018.11:5057-5594   | 1.79769e+308 | AT2G45760.1 | BALBAP2                     | BON association protein 2                                                    |
| MDP0000478473 | MDC037119.7:1598-3986    | 1.97805      | AT5G36110.1 | CYP716A1                    | cytochrome P450, family 716, subfamily A, polypeptide 1                      |
| 0             | MDC037361.9:6784-7143    | 1.79769e+308 |             |                             |                                                                              |
| MDP0000836051 | MDC037626.18:47629-48283 | 3.23594      | AT2G46150.1 |                             | Late embryogenesis abundant (LEA) hydroxyproline-rich glycoprotein family    |
| 0             | MDC038019.6:878-1176     | 1.79769e+308 |             |                             |                                                                              |
| MDP0000739955 | MDC038611.7:8913-9138    | 4.66013      |             |                             |                                                                              |
| MDP0000739957 | MDC038611.7:9423-12725   | 1.79769e+308 |             |                             |                                                                              |
| MDP0000229364 | MDC039821.7:261-870      | 3.78343      | AT1G24020.1 | MPL423                      | MPL-like protein 423                                                         |
| 0             | MDC039927.8:6532-7016    | 1.79769e+308 | AT5G45230.1 |                             | Disease resistance protein (TIR-NBS-LRR class) family                        |
| MDP0000317158 | MDC039977.12:10248-22411 | -1.92458     | AT2G42990.1 |                             | GDSL-like Lipase/Acylhydrolase superfamily protein                           |
| MDP0000627178 | MDC039977.12:10248-22411 | 2.53116      | AT3G11660.1 | NHL1                        | NDR1/HIN1-like 1                                                             |
| MDP0000246775 | MDC040311.10:4864-6142   | 1.95053      | AT1G75800.1 |                             | Pathogenesis-related thaumatin superfamily protein                           |
| MDP0000635659 | MDC041102.8:8881-9496    | 2.0994       | AT1G17860.1 |                             | Kunitz family trypsin and protease inhibitor protein                         |
| MDP0000134064 | MDC042253.3:3937-5643    | 1.79769e+308 |             |                             |                                                                              |
| MDP0000345608 | MDC043894.10:1318-1504   | 1.79769e+308 |             |                             |                                                                              |

Supplementary Table 2 BLASTx results of the significantly differentially expressed novel ORFs in *M. x domestica* in response to fire blight infection.

| <i>M. domestica</i> locus | <i>A. thaliana</i> accession | <i>A. thaliana</i> name     | Description                                                                                               |
|---------------------------|------------------------------|-----------------------------|-----------------------------------------------------------------------------------------------------------|
| MDC000127.652:4251-4492   | AT4G33720.1                  |                             | CAP (Cysteine-rich secretory proteins, Antigen 5, and Pathogenesis-related 1 protein) superfamily protein |
| MDC000446.497:2613-3451   | AT3G19615.1                  |                             | unknown protein                                                                                           |
| MDC000455.144:3026-3468   | AT4G24620.1                  | PGI1, PGI                   | phosphoglucose isomerase 1                                                                                |
| MDC001441.272:13692-14163 | AT5G43920.1                  |                             | transducin family protein / WD-40 repeat family protein                                                   |
| MDC001471.424:93507-93619 | AT2G29260.1                  |                             | NAD(P)-binding Rossmann-fold superfamily protein                                                          |
| MDC001671.165:2805-2973   | AT1G78380.1                  | ATGSTU19, GST8, GSTU19      | glutathione S-transferase TAU 19                                                                          |
| MDC001963.417:4816-4925   | AT4G27250.2                  |                             | NAD(P)-binding Rossmann-fold superfamily protein                                                          |
| MDC002322.251:26803-27928 | AT4G11280.1                  | ACS6, ATACS6                | 1-aminocyclopropane-1-carboxylic acid (acc) synthase 6                                                    |
| MDC002431.300:11772-11965 | AT5G19130.2                  |                             | GPI transamidase component family protein / Gaa1-like family protein                                      |
| MDC002799.293:2023-2423   | AT2G29330.1                  | TRI                         | tropinone reductase                                                                                       |
| MDC003306.225:3010-3406   | AT2G16850.1                  | PIP3B, PIP2:8               | plasma membrane intrinsic protein 2:8                                                                     |
| MDC003716.306:46958-47066 | AT1G03260.1                  |                             | SNARE associated Golgi protein family                                                                     |
| MDC004097.232:8798-9675   | AT2G46150.1                  |                             | Late embryogenesis abundant (LEA) hydroxyproline-rich glycoprotein family                                 |
| MDC004475.200:15597-16341 | AT2G46150.1                  |                             | Late embryogenesis abundant (LEA) hydroxyproline-rich glycoprotein family                                 |
| MDC005490.240:8153-8416   | AT5G66180.3                  |                             | S-adenosyl-L-methionine-dependent methyltransferases superfamily protein                                  |
| MDC005927.393:5902-6584   | AT5G10830.1                  |                             | S-adenosyl-L-methionine-dependent methyltransferases superfamily protein                                  |
| MDC006260.462:8079-8672   | AT1G23440.1                  |                             | Peptidase C15, pyroglutamyl peptidase I-like                                                              |
| MDC006289.408:7320-7584   | AT2G45960.3                  | PIP1B, TMP-A, ATHH2, PIP1:2 | plasma membrane intrinsic protein 1B                                                                      |
| MDC006603.734:2300-2410   | AT5G39110.1                  |                             | RmlC-like cupins superfamily protein                                                                      |
| MDC007088.513:4786-5156   | AT5G24810.2                  |                             | ABC1 family protein                                                                                       |
| MDC007581.595:2473-2576   | AT4G28460.1                  |                             | unknown protein                                                                                           |
| MDC007779.587:2989-3343   | AT3G14630.1                  | CYP72A14                    | cytochrome P450, family 72, subfamily A, polypeptide 14                                                   |
| MDC007779.587:3489-4308   | AT3G14680.1                  | CYP72A9                     | cytochrome P450, family 72, subfamily A, polypeptide 9                                                    |
| MDC008017.329:6473-7175   | AT2G46150.1                  |                             | Late embryogenesis abundant (LEA) hydroxyproline-rich glycoprotein family                                 |
| MDC008031.166:8984-9384   | AT3G60030.1                  | SPL12                       | squamosa promoter-binding protein-like 12                                                                 |
| MDC008212.493:3616-4058   | AT5G43180.1                  |                             | Protein of unknown function, DUF599                                                                       |
| MDC008216.318:26921-27156 | AT4G20820.1                  |                             | FAD-binding Berberine family protein                                                                      |
| MDC008563.271:10114-10663 | AT1G75620.1                  |                             | glyoxal oxidase-related protein                                                                           |
| MDC009139.374:7848-8934   | AT2G46150.1                  |                             | Late embryogenesis abundant (LEA) hydroxyproline-rich glycoprotein family                                 |
| MDC009630.367:24050-24262 | AT2G03810.4                  |                             | 18S pre-ribosomal assembly protein gar2-related                                                           |
| MDC009830.388:3008-4348   | AT5G13930.1                  | CHS, TT4, ATCHS             | Chalcone and stilbene synthase family protein                                                             |
| MDC010174.397:11633-14111 | AT2G46150.1                  |                             | Late embryogenesis abundant (LEA) hydroxyproline-rich glycoprotein family                                 |
| MDC010474.340:3456-4185   | AT2G46150.1                  |                             | Late embryogenesis abundant (LEA) hydroxyproline-rich glycoprotein family                                 |
| MDC010476.238:18498-19659 | AT2G46150.1                  |                             | Late embryogenesis abundant (LEA) hydroxyproline-rich glycoprotein family                                 |
| MDC010912.583:5714-6300   | AT2G36380.1                  | PDR6, ATPDR6                | pleiotropic drug resistance 6                                                                             |
| MDC010981.245:18382-19274 | AT3G61510.1                  | ACS1, AT-ACS1               | ACC synthase 1                                                                                            |
| MDC011449.97:11886-12570  | AT2G18680.1                  |                             | unknown protein                                                                                           |
| MDC011459.391:12253-12872 | AT2G39210.1                  |                             | Major facilitator superfamily protein                                                                     |
| MDC011603.242:16362-17137 | AT4G33720.1                  |                             | CAP (Cysteine-rich secretory proteins, Antigen 5, and Pathogenesis-related 1 protein) superfamily protein |
| MDC011770.416:7739-8412   | AT2G46150.1                  |                             | Late embryogenesis abundant (LEA) hydroxyproline-rich glycoprotein family                                 |
| MDC011773.84:2484-3065    | AT2G23270.1                  |                             | unknown protein                                                                                           |
| MDC012392.481:2083-2367   | AT2G29420.1                  | ATGSTU7, GST25, GSTU7       | glutathione S-transferase tau 7                                                                           |
| MDC012392.481:2550-3061   | AT3G09270.1                  | ATGSTU8, GSTU8              | glutathione S-transferase TAU 8                                                                           |
| MDC012733.121:11561-12529 | AT4G11280.1                  | ACS6, ATACS6                | 1-aminocyclopropane-1-carboxylic acid (acc) synthase 6                                                    |
| MDC012900.215:12407-12925 | AT5G01710.1                  |                             | methyltransferases                                                                                        |
| MDC013340.296:1896-2851   | AT5G66900.1                  |                             | Disease resistance protein (CC-NBS-LRR class) family                                                      |
| MDC013531.194:13169-13505 | AT3G54820.1                  | PIP2D, PIP2:5               | plasma membrane intrinsic protein 2:5                                                                     |
| MDC013863.433:28953-29243 | AT2G27450.2                  | NLP1, ATNLP1, CPA           | nitrilase-like protein 1                                                                                  |
| MDC015077.305:4104-4809   | AT2G45570.1                  | CYP76C2                     | cytochrome P450, family 76, subfamily C, polypeptide 2                                                    |
| MDC015146.108:31720-32772 | AT2G04780.2                  | FLA7                        | FASCICLIN-like arabinogalactan 7                                                                          |
| MDC015272.259:4201-4401   | AT3G02050.1                  | KUP3, ATKUP3, ATKT4         | K+ uptake transporter 3                                                                                   |
| MDC015771.323:788-1107    | AT1G39190.1                  |                             | GHPM kinase family protein                                                                                |
| MDC016234.268:19756-19922 | AT5G07050.1                  |                             | nodulin MtN21 / EamA-like transporter family protein                                                      |
| MDC017013.566:1815-2228   | AT2G45220.1                  |                             | Plant invertase/pectin methylesterase inhibitor superfamily                                               |
| MDC017013.566:2346-2726   | AT2G45220.1                  |                             | Plant invertase/pectin methylesterase inhibitor superfamily                                               |
| MDC017013.566:514-1355    | AT2G45220.1                  |                             | Plant invertase/pectin methylesterase inhibitor superfamily                                               |
| MDC017130.237:1246-1897   | AT1G18390.2                  |                             | Protein kinase superfamily protein                                                                        |
| MDC017450.136:8789-9313   | AT3G16340.2                  | PDR1                        | pleiotropic drug resistance 1                                                                             |
| MDC017540.252:44737-45439 | AT4G20820.1                  |                             | FAD-binding Berberine family protein                                                                      |
| MDC017935.299:4662-5932   | AT1G30700.1                  |                             | FAD-binding Berberine family protein                                                                      |
| MDC018101.293:13762-13915 | AT1G10010.1                  | AAP8, AATAAP8               | amino acid permease 8                                                                                     |
| MDC018495.75:656-1593     | AT2G46150.1                  |                             | Late embryogenesis abundant (LEA) hydroxyproline-rich glycoprotein family                                 |
| MDC018532.136:875-1203    | AT4G25340.2                  | FKBP53                      | FK506 BINDING PROTEIN 53                                                                                  |
| MDC018858.178:25373-25918 | AT1G01490.2                  |                             | Heavy metal transport/detoxification superfamily protein                                                  |
| MDC019060.82:24775-25363  | AT1G01490.2                  |                             | Heavy metal transport/detoxification superfamily protein                                                  |
| MDC019105.344:1605-2183   | AT4G23160.1                  | CRK8                        | cysteine-rich RLK (RECEPTOR-like protein kinase) 8                                                        |
| MDC019583.195:2352-2815   | AT2G37760.1                  |                             | NAD(P)-linked oxidoreductase superfamily protein                                                          |
| MDC019583.195:3051-3246   | AT2G37770.2                  |                             | NAD(P)-linked oxidoreductase superfamily protein                                                          |
| MDC020082.224:15608-15824 | AT1G66950.1                  | PDR11, ATPDR11              | pleiotropic drug resistance 11                                                                            |
| MDC020082.224:16228-16490 | AT2G36380.1                  | PDR6, ATPDR6                | pleiotropic drug resistance 6                                                                             |
| MDC020082.224:16703-17360 | AT2G36380.1                  | PDR6, ATPDR6                | pleiotropic drug resistance 6                                                                             |
| MDC020098.119:12808-13292 | AT3G16340.2                  | PDR1                        | pleiotropic drug resistance 1                                                                             |
| MDC020206.60:80379-80919  | AT3G48180.1                  |                             | unknown protein                                                                                           |
| MDC021555.260:3534-3862   | AT4G20970.1                  |                             | basic helix-loop-helix (bHLH) DNA-binding superfamily protein                                             |
| MDC021563.286:640-1084    | AT5G37850.3                  | SOS4                        | pKb-like carbohydrate kinase family protein                                                               |
| MDC021658.157:9449-9957   | AT1G60950.1                  | FED A, ATPFD2               | 2Fe-2S ferredoxin-like superfamily protein                                                                |
| MDC022115.179:2130-2784   | AT5G06320.1                  | NHL3                        | NDR1/HIN1-like 3                                                                                          |
| MDC022366.63:24207-24828  | AT5G13220.4                  |                             | jasmonate-zim-domain protein 10                                                                           |
| MDC022531.114:4018-4893   | AT2G46150.1                  |                             | Late embryogenesis abundant (LEA) hydroxyproline-rich glycoprotein family                                 |
| MDC022879.56:1375-1884    | AT2G22420.1                  |                             | Peroxidase superfamily protein                                                                            |
| MDC027586.25:17627-18649  | AT2G46150.1                  |                             | Late embryogenesis abundant (LEA) hydroxyproline-rich glycoprotein family                                 |
| MDC027586.25:9596-10534   | AT3G54200.1                  |                             | Late embryogenesis abundant (LEA) hydroxyproline-rich glycoprotein family                                 |
| MDC031150.12:8267-8723    | AT4G18160.1                  | KCO6, ATPPK3, ATKCO6, TPK3  | Ca2+ activated outward rectifying K+ channel 6                                                            |
| MDC039927.8:6532-7016     | AT5G45230.1                  |                             | Disease resistance protein (TIR-NBS-LRR class) family                                                     |

Supplementary Table 3 BLASTx results of all expressed (non-significant) novel ORFs in *M. x domestica*.

| <i>M. domestica</i> locus | <i>A. thaliana</i> accession | PFAM                            | Panther       | Clusters of c Enzyme cod | KEGG orthology        | Description                                                                                 |
|---------------------------|------------------------------|---------------------------------|---------------|--------------------------|-----------------------|---------------------------------------------------------------------------------------------|
| MDC000047.154:15534-16428 | AT5G10840.1                  | PF02990                         | PTHR10766     | KOG1278                  |                       | transmembrane 9 superfamily member, putative, expressed                                     |
| MDC001087.439:6147-6450   | AT5G20790.2                  |                                 |               |                          |                       |                                                                                             |
| MDC011504.316:3604-3768   | AT5G56670.1                  | PF04758                         | PTHR12650     | KOG0009                  | K02983                | expressed protein                                                                           |
| MDC011558.545:2913-3398   | AT4G38840.1                  | PF02519                         |               |                          | K14488                | OsSAUR31 - Auxin-responsive SAUR gene family member, expressed                              |
| MDC011558.545:10592-11117 | AT4G38840.1                  | PF02519                         |               |                          | K14488                | OsSAUR31 - Auxin-responsive SAUR gene family member, expressed                              |
| MDC011670.126:374-634     | AT2G44620.1                  | PF00550                         | PTHR20863     | KOG1748                  | 1.6.5.3.1.6.98 K03955 | acyl carrier protein, putative, expressed                                                   |
| MDC011700.243:1227-1605   | AT5G08139.1                  | PF00097                         | PTHR22763     | KOG1493                  |                       | zinc finger, C3HC4 type domain containing protein, expressed                                |
| MDC011702.243:1833-2070   | AT2G37660.1                  |                                 | PTHR14194     | KOG1203                  |                       | NAD dependent epimerase/dehydratase family protein, putative, expressed                     |
| MDC011702.243:3359-3717   | AT2G37660.1                  |                                 | PTHR14194     | KOG1203                  |                       | NAD dependent epimerase/dehydratase family protein, putative, expressed                     |
| MDC011704.133:1724-2278   | AT5G20680.3                  | PF03005                         |               |                          |                       | expressed protein                                                                           |
| MDC011727.163:5647-5848   | AT3G04730.1                  | PF02309                         |               |                          |                       | OsIAA30 - Auxin-responsive Aux/IAA gene family member, expressed                            |
| MDC011727.163:7232-7693   | AT3G04730.1                  | PF02309                         |               |                          |                       | OsIAA30 - Auxin-responsive Aux/IAA gene family member, expressed                            |
| MDC011766.689:5483-5959   | AT2G20142.1                  | PF01582                         |               |                          |                       | expressed protein                                                                           |
| MDC011768.383:32501-33098 | AT3G23920.1                  | PF01373                         |               |                          |                       | beta-amylase, putative, expressed                                                           |
| MDC011804.393:6327-6784   | AT3G51670.1                  | PF03765,PF00650                 | PTHR23324     | KOG1471                  |                       | patellin protein, putative, expressed                                                       |
| MDC011809.297:12013-12383 | AT3G44280.1                  |                                 |               |                          |                       | expressed protein                                                                           |
| MDC011970.92:16025-16891  | AT3G13920.4                  | PF00270,PF00271                 | PTHR10967     | KOG0328                  |                       | DEAD-box ATP-dependent RNA helicase, putative, expressed                                    |
| MDC011970.92:17409-17837  | AT1G64270.2                  | PF00270,PF00271                 | PTHR10967     | KOG0327                  | K03257                | DEAD-box ATP-dependent RNA helicase, putative, expressed                                    |
| MDC012057.108:18172-18502 | AT1G11170.1                  | PF05212                         |               |                          |                       | lysine ketoglutarate reductase trans-splicing related 1, putative, expressed                |
| MDC012065.78:5672-5927    | AT1G79040.1                  | PF04725                         |               |                          |                       | photosystem II 10 kDa polypeptide, chloroplast precursor, putative, expressed               |
| MDC012139.232:7565-8258   | AT1G73100.1                  | PF02182,PF05033,PF00856         | PTHR22884     | KOG1082                  |                       | histone-lysine N-methyltransferase, H3 lysine-9 specific SUVH1, putative, expressed         |
| MDC001187.272:8633-8985   | AT1G36050.2                  | PF07970                         | PTHR10984     | KOG2667                  |                       | endoplasmic reticulum-Golgi intermediate compartment protein 3, putative, expressed         |
| MDC012149.217:8136-8679   | AT1G48830.2                  | PF01251                         | PTHR11278     | KOG3320                  |                       | 40S ribosomal protein S7, putative                                                          |
| MDC012246.289:9924-10344  | AT2G30710.1                  | PF00566                         | PTHR22957     | KOG1092                  |                       | TBC domain containing protein, expressed                                                    |
| MDC012278.208:17918-18313 | AT5G62790.2                  | PF02670,PF08436                 |               |                          | 1.1.1.267 K00099      | 1-deoxy-D-xylulose 5-phosphate reductoisomerase, chloroplast precursor, putative, expressed |
| MDC012291.307:22481-23638 | AT2G16365.4                  | PF00646                         |               |                          |                       | expressed protein                                                                           |
| MDC012304.216:7950-8423   | AT1G05660.1                  | PF00295                         |               |                          |                       | polygalacturonase, putative, expressed                                                      |
| MDC012304.216:8670-9266   | AT1G02790.1                  | PF00295                         |               |                          | 3.2.1.67 K01213       | polygalacturonase, putative, expressed                                                      |
| MDC012329.239:6033-6692   | AT5G05340.1                  | PF00141                         |               |                          | 1.11.1.7 K00430       | peroxidase precursor, putative, expressed                                                   |
| MDC001207.483:41049-41732 | AT1G16560.4                  | PF04080                         |               |                          |                       | per1-like family protein, putative, expressed                                               |
| MDC012329.239:7209-7460   | AT5G58390.1                  | PF00141                         | PTHR13148     |                          | 1.11.1.7 K00430       | peroxidase precursor, putative, expressed                                                   |
| MDC012329.239:7574-7771   | AT5G58390.1                  | PF00141                         |               |                          | 1.11.1.7 K00430       | peroxidase precursor, putative, expressed                                                   |
| MDC012329.239:8539-8816   | AT5G05340.1                  | PF00141                         |               |                          | 1.11.1.7 K00430       | peroxidase precursor, putative, expressed                                                   |
| MDC012329.239:18042-18170 | AT2G30330.1                  | PF06320                         | PTHR13073     | KOG3390                  |                       | expressed protein                                                                           |
| MDC012329.239:18286-18476 | AT2G30330.1                  | PF06320                         | PTHR13073     | KOG3390                  |                       | expressed protein                                                                           |
| MDC012392.517:8036-8280   | AT1G78380.1                  | PF02798,PF00043                 | PTHR11260     | KOG0406                  |                       | glutathione S-transferase, putative, expressed                                              |
| MDC012438.121:1208-1390   | AT4G29260.1                  | PF03767                         |               |                          |                       | HAD superfamily phosphatase, putative, expressed                                            |
| MDC012447.123:2145-2841   | AT4G01370.1                  | PF00069                         | PTHR11295     | KOG0660                  | 2.7.11.24 K04371      | CGMC_MAPKCMGC_2_ERK.14 - CGMC includes CDA, MAPK, GSK3, and CLKC kinases                    |
| MDC012491.393:4-602       | AT3G14840.2                  | PF00560,PF11721,PF07714,PF00069 | PTHR23258     | KOG1187                  |                       | receptor-like protein kinase 2, putative, expressed                                         |
| MDC012491.394:7041-7535   | AT3G14840.2                  | PF00560,PF11721,PF07714,PF00069 | PTHR23258     | KOG1187                  |                       | receptor-like protein kinase 2, putative, expressed                                         |
| MDC012594.475:10716-11062 | AT4G04630.1                  | PF04520                         |               |                          |                       | DUF584 domain containing protein, putative, expressed                                       |
| MDC012645.61:1423-1710    | AT1G56700.2                  |                                 | PTHR23402     | KOG4755                  |                       | pyrrolidone-carboxylate peptidase, putative, expressed                                      |
| MDC012725.448:862-977     | AT5G11260.1                  | PF00170,PF07716                 | PTHR13301     |                          |                       | bZIP transcription factor domain containing protein                                         |
| MDC012817.629:817-1307    | AT2G38000.1                  | PF00684                         |               |                          | KOG2813               | expressed protein                                                                           |
| MDC012823.282:222-434     | AT3G15690.2                  | PF00364                         | PTHR18866:SF1 |                          |                       |                                                                                             |
| MDC012824.191:6532-7133   | AT1G30330.2                  | PF02362,PF06507,PF02309         |               |                          |                       | auxin response factor, putative, expressed                                                  |
| MDC012868.151:2447-3068   | AT1G79200.1                  |                                 | PTHR18460     |                          |                       | splicing factor, arginine/serine-rich 12, putative, expressed                               |
| MDC012916.334:10310-10713 | AT3G21700.2                  | PF08477                         | PTHR11708     | KOG1673                  |                       | ras-related protein, putative, expressed                                                    |
| MDC012916.334:12813-13262 | AT3G21700.1                  | PF08477                         | PTHR11708     | KOG1673                  |                       | ras-related protein, putative, expressed                                                    |
| MDC012916.334:13398-13687 | AT1G05205.1                  |                                 |               |                          |                       | expressed protein                                                                           |
| MDC012939.284:5004-5485   | AT3G27090.1                  | PF10539                         | PTHR23230     |                          |                       | N-rich protein, putative, expressed                                                         |
| MDC013003.189:32585-33033 | AT3G49590.3                  | PF10033                         |               |                          | KOG4573               | expressed protein                                                                           |
| MDC013090.275:11344-11505 | AT3G57450.1                  |                                 |               |                          |                       | conserved hypothetical protein                                                              |
| MDC013096.127:33850-34454 | AT1G15080.1                  | PF01569                         | PTHR10165     | KOG3030                  |                       | lipid phosphatase protein, putative, expressed                                              |
| MDC013173.321:5324-5406   | AT5G59840.1                  | PF00071,PF08477                 | PTHR11708     | KOG0078                  | K07901                | ras-related protein, putative, expressed                                                    |
| MDC013184.220:3935-4234   | AT5G47030.1                  | PF02823                         | PTHR13822     | KOG1758                  | 3.6.3.14 K02134       | ATP synthase delta chain, mitochondrial precursor, putative, expressed                      |
| MDC013211.128:15219-15773 | AT5G12340.1                  |                                 |               |                          |                       | expressed protein                                                                           |
| MDC001250.283:31328-31743 | AT3G06740.1                  | PF00320                         | PTHR22949:SF3 |                          |                       | expressed protein                                                                           |
| MDC013254.184:26548-26887 | AT5G28750.1                  | PF02416                         |               |                          | K03116                | mttA/Hcf106 family protein, putative, expressed                                             |
| MDC013272.255:2408-2881   | AT1G24440.1                  | PF00097                         |               |                          |                       | zinc finger, RING-type, putative, expressed                                                 |
| MDC013292.269:3429-3656   | AT3G52930.1                  | PF00274                         | PTHR11627     | KOG1557                  | 4.1.2.13 K01623       | fructose-bisphosphate aldolase isozyme, putative, expressed                                 |
| MDC001262.252:30916-31314 | AT4G13780.1                  | PF09334,PF01588                 | PTHR11946     | KOG1247                  | 6.1.1.10 K01874       | methionyl-tRNA synthetase, putative, expressed                                              |
| MDC013317.553:7451-7667   | AT2G36630.1                  | PF01925                         | PTHR14255     |                          |                       | membrane protein, putative, expressed                                                       |
| MDC013317.563:24791-24933 | AT5G56670.1                  | PF04758                         | PTHR12650     | KOG0009                  | K02983                | expressed protein                                                                           |
| MDC013338.153:2636-3071   | AT1G18720.1                  | PF06127                         |               |                          | KOG3292               | YGL010w, putative, expressed                                                                |
| MDC013392.463:8-454       | AT4G31130.1                  | PF06749                         |               |                          |                       | expressed protein                                                                           |
| MDC001273.352:1230-1510   | AT1G02680.1                  | PF02269                         | PTHR11380     | KOG3901                  | K03127                | transcription initiation factor IID, 18kD subunit family protein, expressed                 |
| MDC013426.256:1484-1797   | AT1G33055.1                  |                                 |               |                          |                       | expressed protein                                                                           |
| MDC013531.194:10446-10802 | AT3G54820.1                  | PF00230                         | PTHR19139     | KOG0223                  | K09872                | aquaporin protein, putative, expressed                                                      |
| MDC013531.194:10944-11090 | AT2G45960.3                  | PF00230                         | PTHR19139     | KOG0223                  | K09872                | aquaporin protein, putative, expressed                                                      |
| MDC013531.194:14302-14625 | AT3G53420.2                  | PF00230                         | PTHR19139     | KOG0223                  | K09872                | aquaporin protein, putative, expressed                                                      |
| MDC013567.369:4887-5108   | AT5G10700.1                  |                                 | PTHR11717     | KOG3305                  |                       | tyrosine phosphatase, putative, expressed                                                   |
| MDC013616.148:3703-3832   | AT5G19140.2                  | PF12481,PF12504                 | PTHR11772     |                          |                       | stem-specific protein TSJT1, putative, expressed                                            |
| MDC013616.148:3970-4115   | AT5G19140.1                  | PF12481,PF12504                 | PTHR11772     |                          |                       | stem-specific protein TSJT1, putative, expressed                                            |
| MDC013616.148:4213-4461   | AT5G19140.2                  | PF12481,PF12504                 | PTHR11772     |                          |                       | stem-specific protein TSJT1, putative, expressed                                            |
| MDC013737.149:3896-4181   | AT4G19645.2                  | PF03798                         | PTHR13439     | KOG4561                  |                       | transmembrane protein 56, putative, expressed                                               |
| MDC001279.248:5742-6162   | AT5G16010.1                  | PF02544                         | PTHR10556     | KOG1638                  |                       | 3-oxo-5-alpha-steroid 4-dehydrogenase, putative, expressed                                  |

|                           |             |                                 |                |         |                |        |                                                                                                                             |
|---------------------------|-------------|---------------------------------|----------------|---------|----------------|--------|-----------------------------------------------------------------------------------------------------------------------------|
| MDC013772.153:30323-30615 | AT3G51100.3 |                                 |                |         |                |        | expressed protein                                                                                                           |
| MDC013796.456:5519-6034   | AT3G22930.1 | PF00036                         | PTHR23050      | KOG0027 |                | K13448 | OsCam2 - Calmodulin, expressed                                                                                              |
| MDC013875.240:1656-1897   | AT5G58240.1 | PF01230                         | PTHR23089      | KOG3379 | 3.6.1.29       | K01522 | histidine triad family protein, putative                                                                                    |
| MDC013883.433:41972-42740 | AT2G27730.1 |                                 |                |         |                |        | expressed protein                                                                                                           |
| MDC013917.369:27861-28177 | AT5G59970.1 | PF00125                         | PTHR10484      | KOG3467 |                | K11254 | Core histone H2A/H2B/H3/H4 domain containing protein, putative, expressed                                                   |
| MDC013978.597:11403-11729 | AT5G03810.1 | PF00657                         | PTHR22835.SF27 |         |                |        | GDSL-like lipase/acylhydrolase, putative, expressed                                                                         |
| MDC013998.456:5517-5937   | AT3G03000.1 | PF00036                         | PTHR10891      | KOG0027 |                | K13448 | OsCML11 - Calmodulin-related calcium sensor protein, expressed                                                              |
| MDC014084.122:12618-13135 | AT3G04630.3 | PF06886                         |                |         |                |        | seed specific protein Bn15D14A, putative, expressed                                                                         |
| MDC014084.127:14385-14849 | AT3G04630.3 | PF06886                         |                |         |                |        | seed specific protein Bn15D14A, putative, expressed                                                                         |
| MDC014088.189:7845-8126   | AT3G21770.1 | PF00141                         |                |         | 1.1.1.1.7      | K00430 | peroxidase precursor, putative, expressed                                                                                   |
| MDC014115.478:5475-5892   | AT3G21000.1 |                                 | PTHR11439      |         |                |        |                                                                                                                             |
| MDC000185.278:3219-3514   | AT3G62880.2 | PF02466                         |                |         |                |        |                                                                                                                             |
| MDC001325.99:2744-3063    | AT1G11200.1 | PF03619                         | PTHR23423      | KOG2641 |                |        | domain of unknown function domain containing protein, expressed                                                             |
| MDC014140.253:47-409      | AT3G47640.3 | PF00010                         |                |         |                |        | helix-loop-helix DNA-binding domain containing protein, expressed                                                           |
| MDC014231.203:16823-17997 | AT2G36460.1 | PF00274                         | PTHR11627      | KOG1557 | 4.1.2.13       | K01623 | fructose-bisphosphate aldolase isozyme, putative, expressed                                                                 |
| MDC015077.305:3146-3873   | AT1G33730.1 | PF00067                         | PTHR19383      | KOG0156 |                |        | cytochrome P450, putative, expressed                                                                                        |
| MDC015153.220:20005-20108 | AT5G54580.1 | PF00076                         | PTHR15241      | KOG0114 |                |        | RNA recognition motif containing protein, putative, expressed                                                               |
| MDC015183.122:8990-9049   | AT5G47200.1 | PF00071,PF08477                 | PTHR11708      | KOG0084 |                | K07976 | ras-related protein, putative, expressed                                                                                    |
| MDC015226.470:54-427      | AT5G36880.2 | PF11930,PF00501                 | PTHR11968      | KOG1175 | 6.2.1.1        | K01895 | AMP-binding enzyme, putative, expressed                                                                                     |
| MDC015226.508:6534-6780   | AT2G18460.1 | PF04367                         |                |         |                |        | protein of unknown function DUF502 domain containing protein, expressed                                                     |
| MDC015229.223:18448-18603 | AT1G08830.2 | PF00080                         | PTHR10003      | KOG0441 | 1.15.1.1       | K04565 | copper/zinc superoxide dismutase, putative, expressed                                                                       |
| MDC015291.262:409-673     | AT4G18040.1 | PF01652                         | PTHR11960      | KOG1670 |                | K03259 | eukaryotic translation initiation factor, putative, expressed                                                               |
| MDC015300.124:5141-5526   | AT4G00026.1 | PF08294                         | PTHR13032      | KOG4836 |                |        | AGAP008572-PA, putative, expressed                                                                                          |
| MDC015306.223:5385-5889   | AT1G25230.1 | PF00149                         | PTHR10161      | KOG2679 |                |        | Ser/Thr protein phosphatase family protein, putative, expressed                                                             |
| MDC015317.38:1691-2088    | AT2G19450.1 | PF03062                         | PTHR10408      | KOG0380 | 2.3.1.20,2.3.1 | K11155 | O-acyltransferase, putative, expressed                                                                                      |
| MDC015354.268:3980-4636   | AT2G45260.1 | PF04859                         |                |         |                |        | GLL1, putative, expressed                                                                                                   |
| MDC015354.268:26756-27169 | AT2G45240.1 | PF01753,PF00557                 | PTHR10804      | KOG2738 | 3.4.11.18      | K01265 | peptidase, M24 family protein, putative, expressed                                                                          |
| MDC015354.268:30817-30986 | AT2G45240.1 | PF01753,PF00557                 | PTHR10804      | KOG2738 | 3.4.11.18      | K01265 | peptidase, M24 family protein, putative, expressed                                                                          |
| MDC015361.139:5122-6154   | AT1G53910.3 | PF00847                         |                |         |                |        | AP2 domain containing protein, expressed                                                                                    |
| MDC015361.232:11883-12412 | AT4G17050.1 | PF07883                         |                |         |                |        | cupin 2, conserved barrel domain protein, putative, expressed                                                               |
| MDC015377.320:8056-8386   | AT1G16250.1 | PF00646,PF07646,PF01344         | PTHR23230      |         |                |        | OsFBK22 - F-box domain and kelch repeat containing protein, expressed                                                       |
| MDC015388.349:245-728     | AT2G33590.1 | PF01370                         | PTHR10366      | KOG1502 |                |        | reductase, putative, expressed                                                                                              |
| MDC001370.310:10351-10720 | ATMG00300.1 |                                 | PTHR11439      |         |                |        |                                                                                                                             |
| MDC015405.307:5999-6733   | AT2G27730.1 |                                 |                |         |                |        | expressed protein                                                                                                           |
| MDC015405.307:11611-12008 | AT2G27450.2 | PF00795                         | PTHR23088      | KOG0806 |                |        | N-carbamoylputrescine amidase, putative, expressed                                                                          |
| MDC015460.735:786-1170    | AT3G17020.1 | PF00582                         |                |         |                |        | universal stress protein domain containing protein, putative, expressed                                                     |
| MDC015489.206:24262-35335 | AT4G12080.1 | PF03479                         |                |         |                |        | AT hook motif domain containing protein, expressed                                                                          |
| MDC015491.125:1309-1363   | AT4G31300.3 | PF00227                         | PTHR11599      | KOG0174 | 3.4.25.1       | K02738 | peptidase, T1 family, putative, expressed                                                                                   |
| MDC015509.61:2649-2790    | AT5G63160.1 | PF00651,PF02135                 | PTHR23230      | KOG1778 |                |        | BTB22 - Bric-a-Brac, Tramtrack, and Broad Complex BTB domain with TAZ zinc finger and Calmodulin-binding domains, expressed |
| MDC015520.222:32010-33690 | AT5G10770.1 |                                 | PTHR13683      | KOG1339 |                |        | aspartic proteinase nepenthesin-2 precursor, putative, expressed                                                            |
| MDC015556.295:6786-7196   | AT4G00030.1 | PF04755                         |                |         |                |        | PAP fibrillin family domain containing protein, expressed                                                                   |
| MDC015585.34:19739-20189  | AT3G54280.2 | PF02985,PF12054,PF00176,PF00271 | PTHR10799      | KOG0392 |                |        | SNF2 family N-terminal domain containing protein, expressed                                                                 |
| MDC015655.486:8519-9001   | AT5G62200.1 | PF06232                         |                |         |                |        | embryo-specific 3, putative, expressed                                                                                      |
| MDC015715.117:4672-5113   | AT4G16580.1 |                                 | PTHR12320      | KOG1379 |                |        | stage II sporulation protein E, putative, expressed                                                                         |
| MDC015785.318:410-690     | AT3G16080.1 | PF01907                         | PTHR10768      | KOG3475 |                | K02922 | ribosomal protein L37, putative, expressed                                                                                  |
| MDC015861.221:33780-34101 | AT2G16430.2 | PF00149                         | PTHR22953      | KOG1378 |                |        | purple acid phosphatase precursor, putative, expressed                                                                      |
| MDC015884.83:20968-21098  | AT1G50370.1 | PF00149                         | PTHR11668      | KOG0373 | 3.1.3.16       | K01090 | Ser/Thr protein phosphatase family protein, putative, expressed                                                             |
| MDC015884.83:23952-24093  | AT3G19980.1 | PF00149                         | PTHR11668      | KOG0373 | 3.1.3.16       | K01090 | Ser/Thr protein phosphatase family protein, putative, expressed                                                             |
| MDC015884.83:25428-25873  | AT3G19980.1 | PF00149                         | PTHR11668      | KOG0373 | 3.1.3.16       | K01090 | Ser/Thr protein phosphatase family protein, putative, expressed                                                             |
| MDC015885.118:3197-3618   | AT1G15520.1 | PF00005,PF01061,PF08370         | PTHR19241      | KOG0065 |                |        | pleiotropic drug resistance protein, putative, expressed                                                                    |
| MDC015885.118:3742-3985   | AT1G15520.1 | PF00005,PF01061,PF08370         | PTHR19241      | KOG0065 |                |        | pleiotropic drug resistance protein, putative, expressed                                                                    |
| MDC001441.272:2572-3023   | AT3G04300.1 | PF05899                         |                |         |                |        | enzyme of the cupin superfamily protein, putative, expressed                                                                |
| MDC015915.252:7548-9246   | AT5G02500.1 | PF00012                         | PTHR19375      | KOG0100 |                | K03283 | DnaK family protein, putative, expressed                                                                                    |
| MDC016026.76:14360-14736  | AT1G30580.1 | PF01926,PF06071                 | PTHR23305      | KOG1491 |                | K06942 | GTP-binding protein, putative, expressed                                                                                    |
| MDC016027.22:3681-3837    | AT4G21105.1 | PF02238                         |                |         |                |        | COX VIIa, putative, expressed                                                                                               |
| MDC016044.175:22582-23026 | ATMG00310.1 |                                 | PTHR19446      |         |                |        | conserved hypothetical protein                                                                                              |
| MDC001441.272:13137-13500 | AT5G43920.1 | PF00400                         | PTHR22838      | KOG0293 |                |        | WD repeat-containing protein, putative, expressed                                                                           |
| MDC016050.65:24-224       | AT3G51000.1 | PF12146,PF00561                 | PTHR10992      | KOG4178 |                |        | hydrolase, alpha/beta fold family domain containing protein, expressed                                                      |
| MDC016095.141:7510-7595   | AT5G59840.1 | PF00071,PF08477                 | PTHR11708      | KOG0078 |                | K07901 | ras-related protein, putative, expressed                                                                                    |
| MDC016096.158:472-890     | AT4G21490.1 | PF07992,PF00070,PF00036         | PTHR22915      | KOG2495 | 1.6.99.3       | K03885 | NADH-ubiquinone oxidoreductase, mitochondrial precursor, putative, expressed                                                |
| MDC016098.147:4891-5339   | AT1G55280.1 | PF03899                         |                |         |                |        | expressed protein                                                                                                           |
| MDC000193.346:9537-9769   | AT3G04400.2 | PF00238                         | PTHR11761      | KOG0901 |                | K02894 | ribosomal protein, putative, expressed                                                                                      |
| MDC016152.155:52339-52623 | AT5G27760.1 | PF04588                         |                |         |                |        | hypoxia-responsive family protein, putative, expressed                                                                      |
| MDC016186.171:1006-1298   | AT3G58970.1 |                                 | PTHR13890      | KOG2662 |                |        | CorA-like magnesium transporter protein, putative, expressed                                                                |
| MDC016186.171:1596-2066   | AT3G51890.1 |                                 | PTHR10639      |         |                |        | expressed protein                                                                                                           |
| MDC001471.424:94139-94333 | AT2G29170.1 |                                 | PTHR19410      |         |                |        | oxidoreductase, short chain dehydrogenase/reductase family domain containing protein, expressed                             |
| MDC016234.268:19514-19639 | AT5G07050.1 | PF00892                         |                |         |                |        | auxin-induced protein 5NG4, putative, expressed                                                                             |
| MDC016234.268:20057-20273 | AT5G07050.1 | PF00892                         |                |         |                |        | auxin-induced protein 5NG4, putative, expressed                                                                             |
| MDC016234.268:20680-20980 | AT5G07050.1 | PF00892                         |                |         |                |        | auxin-induced protein 5NG4, putative, expressed                                                                             |
| MDC016261.58:2022-2456    | AT4G21460.1 | PF10213                         | PTHR13490.SF4  |         |                |        | expressed protein                                                                                                           |
| MDC016265.275:3809-5168   | AT4G21990.1 | PF01507,PF00085                 | PTHR18929      | KOG0189 | 1.8.4.9        | K05907 | SNF1-related protein kinase regulatory subunit beta-1, putative, expressed                                                  |
| MDC016279.371:5166-5698   | AT4G16360.3 | PF04739                         | PTHR10343      | KOG1616 |                |        | iron-sulfur cluster assembly enzyme ISCU, mitochondrial precursor, putative, expressed                                      |
| MDC016282.141:417-597     | AT4G22220.1 | PF01592                         | PTHR10093      | KOG3361 |                |        | expressed protein                                                                                                           |
| MDC016368.213:31185-31562 | AT5G24350.2 | PF08314                         |                |         |                |        | cytochrome P450, putative, expressed                                                                                        |
| MDC001530.209:10977-11259 | AT3G61040.1 | PF00067                         | PTHR19383      | KOG0156 |                |        | reductase, putative, expressed                                                                                              |
| MDC016613.108:4593-5046   | AT2G33590.1 | PF01370                         | PTHR10366      | KOG1502 |                |        | ER lumen protein retaining receptor, putative, expressed                                                                    |
| MDC016680.236:5904-6226   | AT4G38790.1 | PF00810                         | PTHR10585      | KOG3106 |                |        | auxin-induced protein 5NG4, putative, expressed                                                                             |
| MDC001542.287:23512-23825 | AT3G30340.1 | PF00892                         |                |         |                |        | B4-BT4 - Bric-a-Brac, Tramtrack, Broad Complex BTB domain with B4 subfamily conserved sequence, expressed                   |
| MDC016719.244:7540-8369   | AT5G41330.1 | PF02214                         | PTHR11145      | KOG2714 |                |        | expressed protein                                                                                                           |
| MDC016733.266:3079-3967   | AT5G56670.1 | PF04758                         | PTHR12650      | KOG0009 |                | K02983 | expressed protein                                                                                                           |

|                            |             |                                 |               |         |                |                                                                                                   |
|----------------------------|-------------|---------------------------------|---------------|---------|----------------|---------------------------------------------------------------------------------------------------|
| MDC016767.549:526-899      | AT1G21630.2 | PF00036                         | PTHR11216     | KOG0998 |                | EF hand family protein, putative, expressed                                                       |
| MDC016767.586:2807-3215    | AT1G21630.1 | PF00036                         | PTHR11216     | KOG0998 |                | EF hand family protein, putative, expressed                                                       |
| MDC016797.262:982-1299     | AT2G24860.1 |                                 |               |         |                | tsi1-interacting protein TSIP1, putative, expressed                                               |
| MDC001544.220:3084-3414    | AT3G50440.1 | PF00561                         | PTHR10992     | KOG1454 |                | OsPOP4 - Putative Prolyl Oligopeptidase homologue, expressed                                      |
| MDC016994.91:1058-1430     | AT5G58740.1 | PF04969                         | PTHR12356     | KOG2265 |                | CS domain containing protein, putative, expressed                                                 |
| MDC001568.219:2517-2945    | AT1G42960.1 |                                 |               |         |                | expressed protein                                                                                 |
| MDC017149.109:416-866      | AT3G17020.1 | PF00582                         |               |         |                | universal stress protein domain containing protein, putative, expressed                           |
| MDC017149.109:1733-2403    | AT3G36659.1 | PF04043                         | PTHR22931.SF5 |         |                | IWS1 homology A, putative, expressed                                                              |
| MDC017203.93:49693-51044   | AT2G32070.1 | PF04857                         | PTHR10797     | KOG0304 |                | CAF1 family ribonuclease containing protein, putative, expressed                                  |
| MDC017207.68:1532-2126     | AT2G01650.1 | PF00096,PF09409,PF00789         | PTHR23153     | KOG2699 | K14011         | UBX domain containing protein, expressed                                                          |
| MDC017303.260:762-1075     | AT1G11880.1 | PF04188                         | PTHR12468     | KOG2647 | 2.4.1.-        | GPI mannosyltransferase 2, putative, expressed                                                    |
| MDC017303.263:3880-4185    | AT1G11880.1 | PF04188                         | PTHR12468     | KOG2647 | 2.4.1.-        | GPI mannosyltransferase 2, putative, expressed                                                    |
| MDC017342.179:6762-7645    | AT1G04170.1 | PF00009,PF03144,PF09173         | PTHR23115     | KOG0466 |                | eukaryotic translation initiation factor 2 subunit gamma, putative, expressed                     |
| MDC001577.2956:23137-23237 | AT3G52930.1 | PF00274                         | PTHR11627     | KOG1557 | 4.1.2.13       | fructose-bisphosphate aldolase isozyme, putative, expressed                                       |
| MDC017415.336:1875-2679    | AT3G13275.1 |                                 |               |         |                |                                                                                                   |
| MDC017440.359:16037-16253  | AT4G29230.1 | PF02365                         |               |         |                | no apical meristem protein, putative, expressed                                                   |
| MDC001577.2956:23551-23754 | AT5G03690.2 | PF00274                         | PTHR11627     | KOG1557 | 4.1.2.13       | fructose-bisphosphate aldolase isozyme, putative, expressed                                       |
| MDC017491.272:6014-6252    | AT2G37660.1 |                                 | PTHR14194     | KOG1203 |                | NAD dependent epimerase/dehydratase family protein, putative, expressed                           |
| MDC017491.272:7509-7862    | AT2G37660.1 |                                 | PTHR14194     | KOG1203 |                | NAD dependent epimerase/dehydratase family protein, putative, expressed                           |
| MDC017518.269:8615-8848    | AT1G05190.1 | PF00347                         | PTHR11655     | KOG3254 |                | ribosomal protein L6, putative, expressed                                                         |
| MDC017518.269:9967-10438   | AT1G05190.1 | PF00347                         | PTHR11655     | KOG3254 |                | ribosomal protein L6, putative, expressed                                                         |
| MDC017540.252:42046-42444  | AT4G20840.1 | PF01565,PF08031                 | PTHR11748     |         |                | reticuline oxidase-like protein precursor, putative, expressed                                    |
| MDC017540.252:45858-46351  | AT5G44410.1 | PF01565,PF08031                 |               |         |                | reticuline oxidase-like protein precursor, putative, expressed                                    |
| MDC017548.358:6850-7605    | AT2G09990.1 | PF00380                         | PTHR21569     | KOG1753 |                | ribosomal protein, putative, expressed                                                            |
| MDC017550.46:15204-15624   | AT5G59970.1 | PF00125                         | PTHR10484     | KOG3467 |                | Core histone H2A/H2B/H3/H4 domain containing protein, putative, expressed                         |
| MDC000205.451:1016-1345    | AT5G43600.1 | PF01546,PF07687                 | PTHR11014     |         |                | peptidase, putative, expressed                                                                    |
| MDC001577.2956:23830-23966 | AT3G52930.1 | PF00274                         | PTHR11627     | KOG1557 | 4.1.2.13       | fructose-bisphosphate aldolase isozyme, putative, expressed                                       |
| MDC017562.415:3865-4030    | AT5G16400.1 | PF00085                         | PTHR10438     | KOG0907 |                | thioredoxin, putative, expressed                                                                  |
| MDC017562.415:5319-5607    | AT3G02730.1 | PF00085                         | PTHR10438     | KOG0907 |                | thioredoxin, putative, expressed                                                                  |
| MDC017580.217:171-361      | AT5G15780.1 | PF01190                         |               |         |                | POE17 - Pollen Ole e 1 allergen and extensin family protein precursor, expressed                  |
| MDC017593.111:3812-4134    | AT2G44650.1 | PF00166                         | PTHR10772     | KOG1641 |                | chaperonin, putative, expressed                                                                   |
| MDC017611.70:9398-9922     | AT5G16790.1 | PF05615                         | PTHR14854     | KOG3215 |                | THO complex subunit 7, putative, expressed                                                        |
| MDC017634.105:22460-22837  | AT1G15000.1 | PF00450                         | PTHR11802     | KOG1282 | 3.4.16.-       | K09645                                                                                            |
| MDC017693.122:6214-6551    | AT5G44380.1 | PF01565,PF08031                 | PTHR11748     |         |                | OsSCP31 - Putative Serine Carboxypeptidase homologue, expressed                                   |
| MDC017695.289:3392-3935    | AT5G60580.4 | PF00097                         | PTHR11748     |         |                | berberine and berberine like domain containing protein, expressed                                 |
| MDC017782.228:7791-8049    | AT2G28710.1 | PF12171,PF00096                 | PTHR23012     | KOG1609 |                | zinc finger, C3HC4 type, domain containing protein, expressed                                     |
| MDC017817.273:3318-3686    | AT5G07900.1 | PF02536                         | PTHR11389     |         |                | ZOS1-14 - C2H2 zinc finger protein, expressed                                                     |
| MDC017829.667:3457-3899    | AT3G10250.2 | PF09713                         |               | KOG1267 |                | mTERF domain containing protein, expressed                                                        |
| MDC001605.331:9735-10084   | AT5G10770.1 |                                 | PTHR13683     | KOG1339 |                | plant-specific domain TIGR01589 family protein, putative, expressed                               |
| MDC017981.251:962-1158     | AT3G48850.1 | PF00153                         | PTHR11896     | KOG0767 |                | aspartic proteinase nepenthesin-2 precursor, putative, expressed                                  |
| MDC001627.237:2537-2717    | AT1G07440.2 | PF00106                         | PTHR19410     | KOG0725 |                | phosphate carrier protein, mitochondrial precursor, putative, expressed                           |
| MDC018008.230:9938-10349   | AT2G37840.2 |                                 | PTHR22982     |         | 2.7.11.1       | K08269                                                                                            |
| MDC018009.138:415-646      | AT5G37710.1 | PF03893,PF01764                 | PTHR21493     | KOG2088 |                | oxidoreductase, short chain dehydrogenase/reductase family protein, putative, expressed           |
| MDC018060.144:425-941      | AT2G25700.1 | PF03931,PF01466                 | PTHR11165     | KOG1724 |                | CAMK_CAMK_like_ULKk_APGy2 - CAMK includes calcium/calmodulin dependent protein kinases, expressed |
| MDC001627.237:2998-3224    | AT2G29350.3 | PF00106                         | PTHR19410     | KOG0725 |                | calmodulin-binding heat-shock protein, putative, expressed                                        |
| MDC018073.537:1656-1915    | AT5G65550.1 |                                 | PTHR11926     | KOG1192 |                | SKP1-like protein 1B, putative, expressed                                                         |
| MDC018073.590:292-852      | AT5G65550.1 |                                 | PTHR11926     | KOG1192 |                | oxidoreductase, short chain dehydrogenase/reductase family protein, putative, expressed           |
| MDC018099.109:12995-13315  | AT3G17820.1 | PF03951,PF00120                 | PTHR20852     | KOG0683 | 6.3.1.2        | K01915                                                                                            |
| MDC018139.149:19551-19623  | AT4G34700.1 | PF05347                         | PTHR12868     | KOG3466 | 1.6.5.3.1.6.99 | K03965                                                                                            |
| MDC018160.157:3495-3833    | AT2G16850.1 | PF00230                         | PTHR19139     | KOG0223 |                | K09872                                                                                            |
| MDC018160.157:3922-4062    | AT5G60660.1 | PF00230                         | PTHR19139     | KOG0223 |                | K09872                                                                                            |
| MDC001627.237:4701-5152    | AT2G29330.1 | PF00106                         | PTHR19410     | KOG0725 | 1.1.1.206      | K08081                                                                                            |
| MDC018160.157:4161-4370    | AT4G35100.2 | PF00230                         | PTHR19139     | KOG0223 |                | K09872                                                                                            |
| MDC018160.157:4570-4823    | AT2G16850.1 | PF00230                         | PTHR19139     | KOG0223 |                | K09872                                                                                            |
| MDC018334.222:6621-6929    | AT2G46070.2 | PF00069,PF07714                 | PTHR11295     | KOG0660 | 2.7.11.24      | K04371                                                                                            |
| MDC018355.124:5469-5749    | AT2G32950.1 | PF00097,PF00400                 | PTHR22847     | KOG0265 | 6.3.2.19       | K10143                                                                                            |
| MDC018359.70:1069-1579     | AT2G02230.1 | PF00646                         |               |         |                | CGMC_MAPKCMGC_2_ERK.13 - CGMC includes CDA, MAPK, GSK3, and CLKK kinases, expressed               |
| MDC018409.250:3724-4557    | AT2G09990.1 | PF00380                         | PTHR21569     | KOG1753 |                | K02960                                                                                            |
| MDC018412.103:26641-27151  | AT3G01360.2 | PF04819                         |               |         |                | OsFBX70 - F-box domain containing protein, expressed                                              |
| MDC018491.206:16889-17230  | AT5G11110.1 | PF08550,PF00534                 | PTHR12526     | KOG0853 |                | ribosomal protein, putative, expressed                                                            |
| MDC018507.307:20436-20547  | AT1G32260.1 | PF00179                         | PTHR11621     | KOG0896 |                | K10704                                                                                            |
| MDC018507.307:20621-20737  | AT2G36060.3 |                                 | PTHR11621     | KOG0896 |                | K10704                                                                                            |
| MDC018507.307:20888-21033  | AT1G32260.1 | PF00179                         | PTHR11621     | KOG0896 |                | K10704                                                                                            |
| MDC018556.272:150-522      | AT5G11760.1 | PF08576                         |               |         |                | expressed protein                                                                                 |
| MDC001661.298:30577-31330  | AT1G01980.1 | PF01565,PF08031                 |               |         |                | reticuline oxidase-like protein precursor, putative, expressed                                    |
| MDC018580.424:39-984       | AT3G58030.4 | PF00097                         | PTHR12313     | KOG0823 |                | zinc finger, C3HC4 type domain containing protein, expressed                                      |
| MDC018648.267:14763-15015  | AT3G44260.1 | PF04857                         | PTHR10797     | KOG0304 |                | CAF1 family ribonuclease containing protein, putative, expressed                                  |
| MDC018648.267:15175-15555  | AT3G44260.1 | PF04857                         | PTHR10797     | KOG0304 |                | CAF1 family ribonuclease containing protein, putative, expressed                                  |
| MDC018667.247:1783-1896    | AT4G23880.1 |                                 |               |         |                |                                                                                                   |
| MDC001665.416:2559-2944    | AT4G38020.1 | PF00588                         | PTHR12029     | KOG2506 |                | RNA methyltransferase, TrmH family protein, putative, expressed                                   |
| MDC018728.83:12896-13234   | AT3G05545.1 | PF00097                         | PTHR22766     |         |                | zinc finger, C3HC4 type domain containing protein, expressed                                      |
| MDC018728.83:23735-24128   | AT3G05530.1 | PF07728,PF00004                 | PTHR23073     | KOG0652 |                | K03065                                                                                            |
| MDC018728.83:24253-24390   | AT3G05530.1 | PF07728,PF00004                 | PTHR23073     | KOG0652 |                | K03065                                                                                            |
| MDC018728.83:24487-24595   | AT3G05530.1 | PF07728,PF00004                 | PTHR23073     | KOG0652 |                | K03065                                                                                            |
| MDC018744.264:10711-11303  | AT2G30950.1 | PF06480,PF07728,PF00004,PF01434 | PTHR23076     | KOG0731 | 3.4.24.-       | K03798                                                                                            |
| MDC018744.264:11400-11646  | AT1G06430.1 | PF06480,PF07728,PF00004,PF01434 | PTHR23076     | KOG0731 | 3.4.24.-       | K03798                                                                                            |
| MDC018820.163:4887-5031    | AT1G67530.2 | PF04564,PF00514                 | PTHR22849     |         |                | OsFtsH2 FtsH protease, homologue of AtFtsH2/8, expressed                                          |
| MDC018837.177:26042-26469  | AT5G41350.1 | PF00097                         | PTHR22937     |         |                | OsFtsH2 FtsH protease, homologue of AtFtsH2/8, expressed                                          |
| MDC018870.194:4803-4978    | AT2G33590.1 | PF01370                         | PTHR10366     | KOG1502 |                | armadillo/beta-catenin repeat family protein, putative, expressed                                 |
| MDC018977.108:28169-28577  | AT3G13677.2 |                                 |               |         |                | zinc finger, C3HC4 type domain containing protein, expressed                                      |
|                            |             |                                 |               |         |                | reductase, putative, expressed                                                                    |
|                            |             |                                 |               |         |                | expressed protein                                                                                 |

|                           |             |                                 |                 |         |           |        |                                                                                                 |
|---------------------------|-------------|---------------------------------|-----------------|---------|-----------|--------|-------------------------------------------------------------------------------------------------|
| MDC018995.224:13429-13760 | AT4G30780.1 |                                 |                 |         |           |        | expressed protein                                                                               |
| MDC019082.128:8813-9112   | AT4G16500.1 | PF00031                         |                 |         |           |        | cysteine proteinase inhibitor 8 precursor, putative, expressed                                  |
| MDC019091.216:2033-2693   | AT5G21940.1 |                                 |                 |         |           |        | MTD1, putative, expressed                                                                       |
| MDC019091.231:35553-36009 | AT3G43860.1 | PF00759                         | PTHR22298       |         | 3.2.1.4   | K01179 | endoglucanase, putative, expressed                                                              |
| MDC019095.63:22484-23000  | AT5G09590.1 | PF00012                         | PTHR19375       | KOG0102 |           | K03283 | DnaK family protein, putative, expressed                                                        |
| MDC001766.131:11010-11410 | AT4G32760.2 | PF00790,PF03127                 | PTHR13856       | KOG1087 |           |        | VHS and GAT domain containing protein, expressed                                                |
| MDC019117.269:5681-6073   | AT4G13520.1 |                                 |                 |         |           |        |                                                                                                 |
| MDC019147.46:9270-9569    | AT1G54250.1 | PF03870                         | PTHR10917       | KOG3400 |           | K03016 | DNA-directed RNA polymerases I, II, and III subunit RPABC3, putative, expressed                 |
| MDC019238.44:5191-5727    | AT5G18200.1 |                                 | PTHR11943       | KOG2958 | 2.7.7.12  | K00965 | galactose-1-phosphate uridylyl transferase, putative, expressed                                 |
| MDC019339.84:8665-9426    | AT2G22420.1 | PF00141                         |                 |         | 1.1.1.7   | K00430 | peroxidase precursor, putative, expressed                                                       |
| MDC019360.344:23048-23730 | AT3G59080.2 |                                 | PTHR13683       | KOG1339 |           |        | aspartic proteinase nepenthesin precursor, putative, expressed                                  |
| MDC019368.126:5277-5781   | AT1G67265.1 | PF08137                         |                 |         |           |        | expressed protein                                                                               |
| MDC019383.46:34094-34336  | AT5G48070.1 | PF00722,PF06955                 |                 |         | 2.4.1.207 | K08235 | glycosyl hydrolases family 16, putative, expressed                                              |
| MDC019400.208:6391-6498   | AT5G47930.1 |                                 | PTHR11594       | KOG1779 |           | K02978 | 40S ribosomal protein S27, putative, expressed                                                  |
| MDC019454.54:10125-10559  | AT5G14420.2 | PF07002,PF00097                 | PTHR10857       | KOG1327 |           |        | copine, putative, expressed                                                                     |
| MDC019461.80:27261-27542  | AT5G52390.1 | PF06521                         |                 |         |           |        |                                                                                                 |
| MDC019461.80:27755-28178  | AT5G52390.1 | PF06521                         |                 |         |           |        |                                                                                                 |
| MDC019484.38:4830-5300    | AT2G39110.1 | PF00069,PF07714                 | PTHR23258       | KOG1187 |           |        | protein kinase APK1A, chloroplast precursor, putative, expressed                                |
| MDC019522.115:11000-11388 | AT5G11600.1 |                                 |                 |         |           |        | expressed protein                                                                               |
| MDC001859.240:11026-11424 | AT3G55070.1 |                                 | PTHR12170       | KOG0396 |           |        | macrophage erythroblast attacher, putative, expressed                                           |
| MDC019537.450:7236-7659   | AT3G09700.1 |                                 | PTHR12763       | KOG0723 |           |        | heat shock protein DnaJ, putative, expressed                                                    |
| MDC019598.191:5158-5543   | ATMG00300.1 |                                 | PTHR11439       |         |           |        |                                                                                                 |
| MDC019710.194:10352-10604 | AT1G43650.2 | PF00892                         |                 |         |           |        | integral membrane protein DUF6 containing protein, expressed                                    |
| MDC019710.194:11838-12171 | AT1G43650.1 | PF00892                         |                 |         |           |        | integral membrane protein DUF6 containing protein, expressed                                    |
| MDC019710.194:13383-13777 | AT1G43650.1 | PF00892                         |                 |         |           |        | integral membrane protein DUF6 containing protein, expressed                                    |
| MDC019720.430:2208-2873   | AT5G24860.1 |                                 |                 |         |           |        | flowering promoting factor-like 1, putative, expressed                                          |
| MDC001883.280:6135-6504   | AT5G16790.1 | PF05615                         | PTHR14854       | KOG3215 |           | K13176 | THO complex subunit 7, putative, expressed                                                      |
| MDC019839.138:30491-30850 | AT4G36130.1 | PF00181,PF03947                 | PTHR13691       | KOG2309 |           | K02938 | 60S ribosomal protein L8, putative, expressed                                                   |
| MDC019846.92:3774-4356    | AT5G44380.1 | PF01565,PF08031                 | PTHR11748       |         |           |        | berberine and berberine like domain containing protein, expressed                               |
| MDC019854.101:11089-11317 | AT1G55740.1 | PF05691                         |                 |         |           |        | uncharacterized glycosyltransferase, putative, expressed                                        |
| MDC019950.115:0-456       | AT2G21110.1 | PF03018                         | PTHR21495       |         |           |        | dirigent, putative, expressed                                                                   |
| MDC019959.138:16420-17121 | AT2G44470.3 | PF00232                         | PTHR21495       | KOG0626 | 3.2.1.147 | K01237 | Os6glu24 - beta-glucosidase homologue, similar to G. max isohydroxyurate hydrolase, expressed   |
| MDC020065.141:605-1042    | AT2G39420.1 | PF12146,PF00561                 | PTHR11614       | KOG1455 |           |        | lipase, putative, expressed                                                                     |
| MDC020127.174:13627-13974 | AT2G18280.2 | PF01167                         | PTHR16517       | KOG2502 |           |        | OsFBT4 - F-box and tubby domain containing protein, expressed                                   |
| MDC020196.147:693-1117    | AT4G29380.1 | PF00069,PF02985,PF00400         | PTHR22971       | KOG1240 | 2.7.11.1  | K08333 | WD domain and HEAT domain containing protein, putative, expressed                               |
| MDC020226.287:8976-9718   | AT5G46770.1 |                                 |                 |         |           |        |                                                                                                 |
| MDC020272.72:5-623        | AT3G25600.1 | PF00036                         | PTHR10891       | KOG0027 |           | K13448 | OsCML14 - Calmodulin-related calcium sensor protein, expressed                                  |
| MDC000218.595:8811-8927   | AT2G18600.1 | PF00179                         | PTHR11621       | KOG0420 | 6.3.2.19  | K10579 | ubiquitin-conjugating enzyme, putative, expressed                                               |
| MDC020310.146:2259-2549   | AT3G57770.1 |                                 | PTHR23258       |         |           |        | OsWAK53b - OsWAK receptor-like protein kinase, expressed                                        |
| MDC020310.146:5216-5468   | AT3G57770.1 |                                 | PTHR23258       |         |           |        | OsWAK53b - OsWAK receptor-like protein kinase, expressed                                        |
| MDC020353.88:17968-18166  | AT5G66450.2 | PF01569                         | PTHR11247       | KOG3146 |           |        | phosphatase, putative, expressed                                                                |
| MDC020364.514:4946-5132   | AT5G15790.2 | PF00097                         | PTHR22766       |         |           |        | zinc finger, C3HC4 type domain containing protein, expressed                                    |
| MDC020450.123:5627-6146   | AT4G03030.1 | PF00646,PF01344,PF07646         | PTHR23230:SF146 |         |           |        | OsFBK6 - F-box domain and kelch repeat containing protein, expressed                            |
| MDC020479.248:5861-6227   | AT1G43640.1 | PF00646,PF01167                 | PTHR16517       | KOG2502 |           |        | OsFBT6 - F-box and tubby domain containing protein, expressed                                   |
| MDC020690.260:22415-22574 | AT5G64200.2 | PF00076                         | PTHR23147       | KOG4207 |           | K12891 | RNA recognition motif containing protein, expressed                                             |
| MDC020733.167:1678-2210   | AT1G55160.3 |                                 |                 |         |           |        | expressed protein                                                                               |
| MDC020827.218:21752-22150 | AT2G24940.1 | PF00173                         | PTHR10281       |         |           |        | cytochrome b5-like Heme/Steroid binding domain containing protein, expressed                    |
| MDC020867.67:244-615      | AT5G62890.3 | PF00860                         | PTHR11119       | KOG1292 |           |        | nucleobase-ascorbate transporter, putative, expressed                                           |
| MDC021014.157:18162-18516 | AT4G31720.1 | PF03540                         | PTHR21242       |         |           | K03134 | transcription initiation factor TFIID subunit 10, putative, expressed                           |
| MDC021147.99:1202-1451    | AT2G03500.1 | PF00249                         |                 |         |           |        | MYB family transcription factor, putative, expressed                                            |
| MDC021331.203:2656-3088   | AT5G11650.1 | PF12146,PF00561                 | PTHR11614       | KOG1455 |           |        | hydrolase, alpha/beta fold family domain containing protein, expressed                          |
| MDC021393.363:4685-5100   | AT4G39730.1 | PF01477                         |                 |         |           |        | wound/stress protein, putative, expressed                                                       |
| MDC021461.112:3144-3560   | AT1G79510.2 | PF10184                         |                 |         |           |        | expressed protein                                                                               |
| MDC021463.473:17752-18244 | AT4G10840.1 | PF07719,PF00515,PF07721         | PTHR19959       | KOG1840 |           |        | tetratricopeptide repeat domain containing protein, expressed                                   |
| MDC001963.417:4488-4646   | AT4G27250.2 | PF01370                         | PTHR10366       | KOG1502 |           |        | dihydroflavonol-4-reductase, putative, expressed                                                |
| MDC021607.243:3134-3692   | AT5G10520.1 | PF00069,PF07714                 | PTHR23258       | KOG1187 |           |        | protein kinase domain containing protein, expressed                                             |
| MDC021609.524:3718-3898   | AT5G34850.1 | PF00149                         | PTHR22953       | KOG1378 |           |        | Ser/Thr protein phosphatase family protein, putative, expressed                                 |
| MDC021614.36:14793-15075  | AT1G34760.2 | PF00244                         | PTHR18860       | KOG0841 |           |        | 14-3-3 protein, putative, expressed                                                             |
| MDC001963.417:5141-5310   | AT4G27250.2 | PF01370                         | PTHR10366       | KOG1502 |           |        | dihydroflavonol-4-reductase, putative, expressed                                                |
| MDC021658.157:7798-8265   | AT1G10950.1 | PF02990,PF09680                 | PTHR10766       | KOG1277 |           |        | transmembrane 9 superfamily member, putative, expressed                                         |
| MDC021663.272:7322-7560   | AT5G59250.1 | PF00083,PF07690                 | PTHR11600       | KOG0254 |           |        | transporter family protein, putative, expressed                                                 |
| MDC021673.67:2187-2416    | AT5G15780.1 | PF01190                         |                 |         |           |        | POE117 - Pollen Ole e 1 allergen and extensin family protein precursor, expressed               |
| MDC021679.163:8234-8578   | AT2G46020.1 | PF08880,PF00176,PF00271,PF00439 | PTHR10799       | KOG0386 |           |        | SNF2 family N-terminal domain containing protein, expressed                                     |
| MDC021726.381:2654-2885   | AT1G33810.1 |                                 |                 |         |           |        | expressed protein                                                                               |
| MDC021888.183:8090-8386   | AT5G60660.1 | PF00230                         | PTHR19139       | KOG0223 |           | K09872 | aquaporin protein, putative, expressed                                                          |
| MDC021946.181:5025-5983   | AT3G44260.1 | PF04857                         | PTHR10797       | KOG0304 |           |        | CAF1 family ribonuclease containing protein, putative, expressed                                |
| MDC021991.115:13313-13634 | AT4G34262.2 |                                 |                 |         |           |        |                                                                                                 |
| MDC022012.425:3903-4199   | AT3G03080.1 | PF00107                         | PTHR11695       | KOG1196 | 1.3.1.74  | K08070 | NADP-dependent oxidoreductase, putative, expressed                                              |
| MDC002052.246:116-455     | AT3G55360.1 | PF02544                         | PTHR10556       | KOG1639 | 1.3.1.-   | K10258 | 3-oxo-5-alpha-steroid 4-dehydrogenase, putative, expressed                                      |
| MDC022074.29:9529-10735   | AT2G37220.1 | PF00076                         | PTHR10432       | KOG0131 |           |        | RNA recognition motif containing protein, putative, expressed                                   |
| MDC022074.29:11143-11246  | AT2G37220.1 | PF00076                         | PTHR10432       | KOG0131 |           |        | RNA recognition motif containing protein, putative, expressed                                   |
| MDC022078.140:14217-14720 | AT5G64816.2 |                                 |                 |         |           |        | THION26 - Plant thionin family protein precursor, expressed                                     |
| MDC022085.43:356-778      | AT4G31300.3 | PF00227                         | PTHR11599       | KOG0174 | 3.4.25.1  | K02738 | peptidase, T1 family, putative, expressed                                                       |
| MDC022085.65:6537-7053    | AT4G31300.3 | PF00227                         | PTHR11599       | KOG0174 | 3.4.25.1  | K02738 | peptidase, T1 family, putative, expressed                                                       |
| MDC022086.272:6317-6499   | AT1G07440.2 | PF00106                         | PTHR19410       | KOG0725 |           |        | oxidoreductase, short chain dehydrogenase/reductase family protein, putative, expressed         |
| MDC022086.272:6776-7049   | AT1G07440.2 | PF00106                         | PTHR19410       | KOG0725 |           |        | oxidoreductase, short chain dehydrogenase/reductase family protein, putative, expressed         |
| MDC022086.272:7788-8194   | AT2G29330.1 | PF00106                         | PTHR19410       | KOG0725 | 1.1.1.206 | K08081 | oxidoreductase, short chain dehydrogenase/reductase family domain containing protein, expressed |
| MDC022119.74:4893-5155    | AT1G65270.1 |                                 |                 | KOG4827 |           |        | expressed protein                                                                               |
| MDC022251.179:6243-7113   | AT3G14310.1 | PF04043,PF01095                 |                 |         |           |        | pectinesterase, putative, expressed                                                             |
| MDC022362.462:10497-10811 | AT1G03210.1 | PF02567                         | PTHR13774       | KOG3033 |           | K06998 | phenazine biosynthesis protein, putative, expressed                                             |

|                           |             |                                         |           |         |           |                                                                                          |
|---------------------------|-------------|-----------------------------------------|-----------|---------|-----------|------------------------------------------------------------------------------------------|
| MDC022362.462:11464-11752 | AT4G02860.1 | PF02567                                 | PTHR13774 | KOG3033 |           | phenazine biosynthesis protein, putative, expressed                                      |
| MDC022376.75:3053-3379    | AT3G03940.1 | PF00069                                 | PTHR11909 | KOG1164 |           | CK1_CaseinKinase_1a.3 - CK1 includes the casein kinase 1 kinases, expressed              |
| MDC022484.73:18974-19931  | AT3G13920.4 | PF00270,PF00271                         | PTHR10967 | KOG0328 |           | DEAD-box ATP-dependent RNA helicase, putative, expressed                                 |
| MDC022484.73:20443-20879  | AT1G54270.2 | PF00270,PF00271                         | PTHR10967 | KOG0327 | K03257    | DEAD-box ATP-dependent RNA helicase, putative, expressed                                 |
| MDC002113.246:13095-13300 | AT2G25910.2 | PF01612,PF00013                         | PTHR12124 |         |           | 3-5 exonuclease/ nucleic acid binding protein, putative, expressed                       |
| MDC022597.70:2400-2698    | AT1G08410.1 | PF01926                                 | PTHR11089 | KOG1424 | 3.6.1.-   | GTPase of unknown function domain containing protein, putative, expressed                |
| MDC022628.340:10959-11393 | AT2G30950.1 | PF06480,PF07728,PF00004,PF01434         | PTHR23076 | KOG0731 | 3.4.24.-  | OsFtsH2 FtsH protease, homologue of AtFtsH2/8, expressed                                 |
| MDC022628.340:12342-12976 | AT2G30950.1 | PF06480,PF07728,PF00004,PF01434         | PTHR23076 | KOG0731 | 3.4.24.-  | OsFtsH2 FtsH protease, homologue of AtFtsH2/8, expressed                                 |
| MDC022628.341:355-501     | AT1G06430.1 | PF06480,PF07728,PF00004,PF01434         | PTHR23076 | KOG0731 | 3.4.24.-  | OsFtsH2 FtsH protease, homologue of AtFtsH2/8, expressed                                 |
| MDC022637.126:5119-5368   | AT1G19640.1 | PF03492                                 |           |         | 2.1.1.141 | SAM dependent carboxyl methyltransferase, putative, expressed                            |
| MDC022637.126:5454-5802   | AT1G19640.1 | PF03492                                 |           |         | 2.1.1.141 | SAM dependent carboxyl methyltransferase, putative, expressed                            |
| MDC022637.126:6384-6996   | AT1G19640.1 | PF03492                                 |           |         | 2.1.1.141 | SAM dependent carboxyl methyltransferase, putative, expressed                            |
| MDC022638.160:2961-3442   | AT1G13245.1 | PF08137                                 |           |         |           | expressed protein                                                                        |
| MDC022642.185:459-976     | AT1G45180.1 | PF00097                                 | PTHR14155 |         |           | zinc finger, C3HC4 type domain containing protein, expressed                             |
| MDC022756.223:2387-2824   | AT2G40935.1 | PF04749                                 |           |         |           | uncharacterized Cys-rich domain containing protein, putative, expressed                  |
| MDC022778.400:862-1178    | AT1G22510.2 | PF06803                                 | PTHR22894 | KOG4604 |           | zinc finger, C3HC4 type domain containing protein, expressed                             |
| MDC022787.507:14430-14765 | AT4G23160.1 | PF07727,PF01657,PF00069,PF07714,PF11883 | PTHR11439 | KOG1187 |           | TKL_IRAK_DUF26-lc.20 - DUF26 kinases have homology to DUF26 containing loci, expressed   |
| MDC022791.14:17058-17637  | AT5G16970.1 | PF00107                                 | PTHR11695 | KOG1196 | 1.3.1.74  | NADP-dependent oxidoreductase, putative, expressed                                       |
| MDC022803.125:8318-8996   | AT5G28540.1 | PF00012                                 | PTHR19375 | KOG0100 |           | DnaK family protein, putative, expressed                                                 |
| MDC022824.308:8367-8863   | AT4G32551.2 | PF08513,PF00400                         | PTHR22847 | KOG0266 |           | transcriptional corepressor LEUNIG, putative, expressed                                  |
| MDC022831.234:2-828       | AT4G17690.1 | PF00141                                 |           |         | 1.1.1.7   | peroxidase family protein, expressed                                                     |
| MDC022831.238:287-403     | AT4G27960.2 | PF00179                                 | PTHR11621 | KOG0417 |           | ubiquitin-conjugating enzyme, putative, expressed                                        |
| MDC022880.59:13085-13467  | AT4G30900.2 |                                         |           |         |           | endonuclease/exonuclease/phosphatase family protein, putative, expressed                 |
| MDC022888.364:12533-12667 | AT3G51730.1 | PF05184,PF03489                         | PTHR11480 | KOG1340 |           | saposin-like type B, region 1 family protein, putative, expressed                        |
| MDC022888.364:12994-13189 | AT3G51730.1 | PF05184,PF03489                         | PTHR11480 | KOG1340 |           | saposin-like type B, region 1 family protein, putative, expressed                        |
| MDC022888.364:14577-14856 | AT3G51730.1 | PF05184,PF03489                         | PTHR11480 | KOG1340 |           | saposin-like type B, region 1 family protein, putative, expressed                        |
| MDC023032.62:43936-44459  | AT5G53220.3 |                                         |           |         |           | expressed protein                                                                        |
| MDC023531.44:2818-2958    | AT3G59540.1 | PF01781                                 | PTHR10965 | KOG3499 | 2.4.1.241 | 60S ribosomal protein L38, putative, expressed                                           |
| MDC023633.27:5099-5516    | AT3G11670.2 |                                         |           |         |           | digalactosylglycerol synthase, chloroplast precursor, putative, expressed                |
| MDC023670.41:2268-2781    | AT2G33590.1 | PF01370                                 | PTHR10366 | KOG1502 |           | reductase, putative, expressed                                                           |
| MDC026269.25:2726-2851    | AT5G64730.1 | PF00400                                 | PTHR22842 | KOG0316 |           | WD domain, G-beta repeat domain containing protein, expressed                            |
| MDC026617.62:10076-10400  | AT5G56190.2 | PF00400                                 | PTHR22847 |         |           | WD-40 repeat family protein, putative, expressed                                         |
| MDC002159.340:12619-13184 | AT1G78290.3 | PF00069                                 | PTHR22982 | KOG0583 | 2.7.11.1  | CAMK_CAMK_like.7 - CAMK includes calcium/calmodulin dependent protein kinases, expressed |
| MDC027871.11:6913-8058    | AT2G45260.1 | PF04859                                 |           |         |           | GL1, putative, expressed                                                                 |
| MDC032130.10:2771-3287    | AT1G08180.1 |                                         |           |         |           |                                                                                          |
| MDC036854.6:543-1070      | AT2G46495.1 | PF00097                                 | PTHR22764 |         |           | zinc finger, C3HC4 type domain containing protein, expressed                             |
| MDC002191.244:5992-6164   | AT5G47030.1 | PF02823                                 | PTHR13822 | KOG1758 | 3.6.3.14  | ATP synthase delta chain, mitochondrial precursor, putative, expressed                   |
| MDC036969.18:8353-8496    | AT1G15270.1 | PF09072                                 |           |         |           | coiled-coil domain-containing protein 72, putative, expressed                            |
| MDC040767.9:10828-11034   | AT3G02250.1 | PF10250                                 |           |         |           | auxin-independent growth promoter protein, putative, expressed                           |
| MDC002203.349:4228-4862   | AT1G62290.2 | PF00026,PF03489,PF05184                 | PTHR13683 | KOG1339 | 3.4.23.40 | aspartic proteinase oryzasin-1 precursor, putative, expressed                            |
| MDC002205.555:7793-8082   | AT1G11910.1 | PF00026,PF03489,PF05184                 | PTHR13683 | KOG1339 | 3.4.23.40 | aspartic proteinase oryzasin-1 precursor, putative, expressed                            |
| MDC002205.555:8858-9031   | AT1G62290.2 | PF00026,PF03489,PF05184                 | PTHR13683 | KOG1339 | 3.4.23.40 | aspartic proteinase oryzasin-1 precursor, putative, expressed                            |
| MDC002205.604:5796-6019   | AT3G15351.2 |                                         |           |         |           | expressed protein                                                                        |
| MDC002252.327:4583-5069   | AT1G07520.1 | PF03514                                 |           |         |           | SCARECROW, putative, expressed                                                           |
| MDC002319.140:10705-11101 | AT2G38905.1 | PF01679                                 | PTHR21659 | KOG1773 |           | OsRCI2-7 - Putative low temperature and salt responsive protein, expressed               |
| MDC000071.210:1438-1573   | AT4G16695.3 |                                         |           |         |           |                                                                                          |
| MDC002360.331:36076-36218 | AT3G17760.2 | PF00282                                 | PTHR11999 | KOG1383 | 4.1.1.15  | decarboxylase, putative, expressed                                                       |
| MDC002367.269:48264-48619 | AT5G17330.1 | PF00282                                 | PTHR11999 | KOG1383 | 4.1.1.15  | glutamate decarboxylase, putative, expressed                                             |
| MDC002367.269:48993-49472 | AT1G65960.2 | PF00282                                 | PTHR11999 | KOG1383 | 4.1.1.15  | glutamate decarboxylase, putative, expressed                                             |
| MDC002367.269:49581-49783 | AT4G13195.1 |                                         |           |         |           |                                                                                          |
| MDC002385.290:19935-20648 | AT4G13230.1 |                                         |           |         |           |                                                                                          |
| MDC002412.304:11037-11650 | AT5G19130.2 | PF04114                                 | PTHR13304 | KOG3566 |           | GPI transamidase component family protein, putative, expressed                           |
| MDC002431.300:12026-12395 | AT3G26510.5 | PF00564                                 |           |         |           | PB1 domain containing protein, expressed                                                 |
| MDC002441.272:2839-3539   | ATCG01250.1 | PF00361                                 | PTHR22773 | KOG4668 |           | NADPH-dependent oxidoreductase, putative expressed protein                               |
| MDC002450.221:3501-4098   | AT3G17668.1 |                                         |           |         |           | oleosin, putative, expressed                                                             |
| MDC002453.447:10532-10849 | AT3G18570.1 | PF01277                                 |           |         |           | 6-phosphofructokinase, putative, expressed                                               |
| MDC00298.380:1328-1593    | AT5G56630.1 | PF00365                                 | PTHR13697 | KOG2440 | 2.7.1.11  | expressed protein                                                                        |
| MDC002536.231:28261-28837 | AT5G02520.1 | PF09133                                 |           |         |           | expressed protein                                                                        |
| MDC002555.573:6522-6894   | AT2G38740.1 | PF00702                                 | PTHR18901 | KOG2914 |           | haloacid dehalogenase-like hydrolase family protein, putative, expressed                 |
| MDC002562.442:3585-4052   | AT2G38740.1 | PF00702                                 | PTHR18901 | KOG2914 |           | haloacid dehalogenase-like hydrolase family protein, putative, expressed                 |
| MDC002562.442:4163-4526   | AT2G38740.1 | PF00702                                 | PTHR18901 | KOG2914 |           | haloacid dehalogenase-like hydrolase family protein, putative, expressed                 |
| MDC002562.442:4820-4968   | AT2G38740.1 | PF00702                                 | PTHR18901 | KOG2914 |           | haloacid dehalogenase-like hydrolase family protein, putative, expressed                 |
| MDC002562.442:5044-5170   | AT3G12587.1 | PF10215                                 |           |         |           | expressed protein                                                                        |
| MDC002563.449:3601-3812   | AT4G02290.1 | PF00759                                 | PTHR22298 |         |           | endoglucanase, putative, expressed                                                       |
| MDC002579.350:565-1558    | AT1G07440.2 | PF00106                                 | PTHR19410 | KOG0725 |           | oxidoreductase, short chain dehydrogenase/reductase family protein, putative, expressed  |
| MDC002584.153:3776-3993   | AT4G10840.1 | PF07719,PF00515,PF07721                 | PTHR19959 | KOG1840 |           | tetratricopeptide repeat domain containing protein, expressed                            |
| MDC002655.565:10635-11102 | AT4G10840.1 | PF07719,PF00515,PF07721                 | PTHR19959 | KOG1840 |           | tetratricopeptide repeat domain containing protein, expressed                            |
| MDC002655.586:7567-8051   | AT5G51700.1 | PF04968                                 | PTHR12621 |         | K13458    | rar1, putative, expressed                                                                |
| MDC002662.815:1633-1925   | AT4G19003.1 | PF05871                                 | PTHR13149 | KOG4068 | K12189    | vacuolar protein-sorting-associated protein 25, putative, expressed                      |
| MDC002663.516:8880-9798   | AT3G12030.1 | PF01956                                 | PTHR20917 | KOG3312 |           | fb27, putative, expressed                                                                |
| MDC002683.322:3279-3696   | AT1G23440.1 |                                         | PTHR23402 | KOG4755 |           | pyrrolidone-carboxylate peptidase, putative, expressed                                   |
| MDC002758.275:5034-5548   | AT1G23440.1 |                                         | PTHR23402 | KOG4755 |           | pyrrolidone-carboxylate peptidase, putative, expressed                                   |
| MDC002758.275:7054-7287   | AT1G52570.1 | PF00168,PF00614,PF12357                 | PTHR18896 | KOG1329 |           | phospholipase D, putative, expressed                                                     |
| MDC002787.258:19523-20073 | AT4G17690.1 | PF00141                                 |           |         | 1.1.1.7   | peroxidase family protein, expressed                                                     |
| MDC002848.461:9691-10126  | AT1G66950.1 | PF00005,PF01061,PF08370                 | PTHR19241 | KOG0065 |           | pleiotropic drug resistance protein, putative, expressed                                 |
| MDC00368.236:1585-1999    | AT2G01410.1 |                                         |           |         |           | expressed protein                                                                        |
| MDC002955.279:38802-39101 | AT1G19240.1 |                                         |           |         |           | expressed protein                                                                        |
| MDC002986.271:21-529      | AT1G02790.1 | PF00295                                 |           |         | 3.2.1.67  | polygalacturonase, putative, expressed                                                   |
| MDC003026.402:4690-4972   | AT2G15450.1 | PF00295                                 |           |         |           | polygalacturonase, putative, expressed                                                   |
| MDC003026.402:5565-6093   | AT5G65550.1 |                                         | PTHR11926 | KOG1192 |           | glucosyltransferase, putative, expressed                                                 |

|                           |             |                         |            |         |           |        |                                                                                                |
|---------------------------|-------------|-------------------------|------------|---------|-----------|--------|------------------------------------------------------------------------------------------------|
| MDC003081.405:1372-1864   | AT5G65550.1 |                         | PTHRR11926 | KOG1192 |           |        | glucosyltransferase, putative, expressed                                                       |
| MDC003081.405:1945-2200   | AT4G21120.1 | PF00324                 | PTHRR11785 | KOG1286 |           |        | amino acid permease family protein, putative                                                   |
| MDC000368.238:33490-34602 | AT3G07760.2 | PF00536                 |            |         |           |        | expressed protein                                                                              |
| MDC003198.202:2865-3190   | AT5G53490.3 | PF00805                 |            |         |           |        | thylakoid luminal protein, putative, expressed                                                 |
| MDC003205.158:29546-29798 | AT5G53490.3 | PF00805                 |            |         |           |        | thylakoid luminal protein, putative, expressed                                                 |
| MDC003205.158:29880-30320 | AT2G46550.2 |                         |            |         |           |        | expressed protein                                                                              |
| MDC003205.158:76934-77309 | AT1G30450.2 | PF00324                 | PTHRR11827 | KOG2082 |           |        | amino acid permease family protein, putative, expressed                                        |
| MDC000368.238:51135-51386 | AT4G35100.2 | PF00230                 | PTHRR19139 | KOG0223 | K09872    |        | aquaporin protein, putative, expressed                                                         |
| MDC003306.225:3479-3782   | AT2G16850.1 | PF00230                 | PTHRR19139 | KOG0223 | K09872    |        | aquaporin protein, putative, expressed                                                         |
| MDC003306.225:3868-4016   | AT2G16850.1 | PF00230                 | PTHRR19139 | KOG0223 | K09872    |        | aquaporin protein, putative, expressed                                                         |
| MDC003306.225:4116-4489   | AT3G02720.1 | PF01965                 | PTHRR11019 | KOG2764 |           |        | DJ-1 family protein, putative, expressed                                                       |
| MDC003313.350:8410-8848   | AT1G31817.1 | PF00411                 | PTHRR11759 | KOG0408 |           |        | ribosomal protein, putative, expressed                                                         |
| MDC003322.305:8692-9506   | AT4G21440.1 | PF00249                 | PTHRR10641 | KOG0048 | K09422    |        | MYB family transcription factor, putative, expressed                                           |
| MDC003396.159:7266-7693   | AT3G16340.2 | PF10161,PF08370,PF00005 | PTHRR19241 | KOG0065 |           |        | pleiotropic drug resistance protein, putative, expressed                                       |
| MDC003415.452:48231-48632 | AT5G18790.1 | PF00471                 |            |         |           |        | 50S ribosomal protein L33, putative, expressed                                                 |
| MDC003417.148:4832-5225   | AT2G02990.1 | PF00445                 | PTHRR11240 | KOG1642 |           |        | ribonuclease T2 family domain containing protein, expressed                                    |
| MDC003465.666:11182-11467 | AT2G47680.1 | PF00271,PF00642         | PTHRR18934 | KOG0920 |           |        | zinc finger helicase family protein, putative, expressed                                       |
| MDC003476.424:4739-5090   | AT2G40370.1 | PF07732,PF00394,PF07731 | PTHRR11709 | KOG1263 |           |        | laccase precursor protein, putative, expressed                                                 |
| MDC003534.362:4332-4810   | AT5G48640.1 | PF00134                 | PTHRR10026 | KOG0794 |           |        | cyclin, putative, expressed                                                                    |
| MDC003623.656:7835-8044   | AT4G00585.1 |                         |            |         |           |        | expressed protein                                                                              |
| MDC003652.401:5479-5810   | AT3G58560.1 | PF03372                 | PTHRR12121 | KOG0620 | 3.1.-.-   | K12603 | endonuclease/exonuclease/phosphatase family domain containing protein, expressed               |
| MDC003661.185:20810-21803 | AT5G08100.1 | PF01112                 | PTHRR10188 | KOG1592 | 3.4.19.5  | K13051 | L-asparaginase precursor protein, putative, expressed                                          |
| MDC003664.475:11513-12117 | AT5G08120.1 |                         |            |         |           |        | microtubule-associated protein, putative, expressed                                            |
| MDC003664.475:17093-17401 | AT5G36110.1 | PF00067                 | PTHRR19383 | KOG0157 |           |        | cytochrome P450, putative, expressed                                                           |
| MDC003668.599:3948-4504   | AT5G36110.1 | PF00067                 | PTHRR19383 | KOG0157 |           |        | cytochrome P450, putative, expressed                                                           |
| MDC003668.599:4608-4827   | AT4G23420.3 | PF00106                 | PTHRR19410 | KOG1208 |           |        | oxidoreductase, short chain dehydrogenase/reductase family domain containing family, expressed |
| MDC003691.613:12408-12611 | AT4G23420.3 | PF00106                 | PTHRR19410 | KOG1208 |           |        | oxidoreductase, short chain dehydrogenase/reductase family domain containing family, expressed |
| MDC003691.613:13105-13267 | AT4G23420.3 | PF00106                 | PTHRR19410 | KOG1208 |           |        | oxidoreductase, short chain dehydrogenase/reductase family domain containing family, expressed |
| MDC003691.613:14240-14582 | AT2G18110.1 | PF00736                 | PTHRR11595 | KOG1668 |           | K03232 | elongation factor protein, putative, expressed                                                 |
| MDC003707.256:151-617     | AT2G02720.1 | PF04431,PF00544         |            |         | 4.2.2.2   | K01728 | pectate lyase precursor, putative, expressed                                                   |
| MDC000416.247:35408-35747 | AT1G11910.1 | PF00026,PF03489,PF05184 | PTHRR13683 | KOG1339 | 3.4.23.40 | K08245 | aspartic proteinase oryzasin-1 precursor, putative, expressed                                  |
| MDC003743.404:7074-7268   | AT1G08230.2 | PF01490                 | PTHRR22950 | KOG1303 |           |        | transmembrane amino acid transporter protein, putative, expressed                              |
| MDC003758.352:13113-13479 | AT3G20600.1 |                         |            |         |           |        | harpin-induced protein 1 domain containing protein, expressed                                  |
| MDC003785.419:14126-14836 | AT2G43780.2 |                         |            |         |           |        | conserved hypothetical protein                                                                 |
| MDC003785.419:15852-16189 | AT3G20800.1 | PF04078                 | PTHRR12262 | KOG3036 |           | K12606 | expressed protein                                                                              |
| MDC003833.254:923-1391    | AT1G14420.1 | PF04431,PF00544         |            |         | 4.2.2.2   | K01728 | pectate lyase precursor, putative, expressed                                                   |
| MDC000416.247:35907-36548 | AT5G66740.1 | PF04788                 |            |         |           |        | expressed protein                                                                              |
| MDC003876.694:2083-2790   | AT5G66740.1 | PF04788                 |            |         |           |        | expressed protein                                                                              |
| MDC003876.694:3305-3512   | AT1G13360.1 |                         |            |         |           |        | expressed protein                                                                              |
| MDC003878.401:325-1733    | AT2G40470.1 | PF03195                 |            |         |           |        | DUF260 domain containing protein, putative, expressed                                          |
| MDC003882.313:12016-12674 | AT2G42760.1 |                         |            |         |           |        | expressed protein                                                                              |
| MDC003889.426:7020-7694   | AT1G71010.1 | PF01504                 | PTHRR23086 | KOG0230 |           |        | 1-phosphatidylinositol-4-phosphate 5-kinase/ zinc ion binding protein, putative, expressed     |
| MDC000421.511:6588-6935   | AT2G01940.3 | PF12171,PF00096         | PTHRR11389 |         |           |        | ZOS08-7 - C2H2 zinc finger protein, expressed                                                  |
| MDC003936.406:51932-52906 | AT1G27530.1 | PF08694                 | PTHRR12921 | KOG3357 |           | K12165 | ufm1-conjugating enzyme 1, putative, expressed                                                 |
| MDC003963.399:2459-2839   | AT1G48830.2 | PF01251                 | PTHRR11278 | KOG3320 |           |        | 40S ribosomal protein S7, putative                                                             |
| MDC004009.559:39608-40030 | AT1G48830.2 | PF01251                 | PTHRR11278 | KOG3320 |           |        | 40S ribosomal protein S7, putative                                                             |
| MDC004009.559:40130-40478 | AT1G48830.2 | PF01251                 | PTHRR11278 | KOG3320 |           |        | 40S ribosomal protein S7, putative                                                             |
| MDC004009.559:40660-40931 | AT3G19760.1 | PF00270,PF00271         | PTHRR10967 | KOG0328 | 3.6.4.13  | K13025 | DEAD-box ATP-dependent RNA helicase, putative, expressed                                       |
| MDC004010.194:30326-30466 | AT2G01970.1 | PF02990                 | PTHRR10766 | KOG1277 |           |        | transmembrane 9 superfamily member, putative, expressed                                        |
| MDC004088.250:961-1337    | AT1G07830.1 | PF06984,PF00831         | PTHRR21183 | KOG3331 |           |        | 39S ribosomal protein L47, mitochondrial precursor, putative, expressed                        |
| MDC004095.243:345-694     | AT2G46150.1 | PF03168                 |            |         |           |        | harpin-induced protein 1 domain containing protein, expressed                                  |
| MDC004097.230:13303-14099 | AT3G54200.1 | PF03168                 |            |         |           |        | harpin-induced protein 1 domain containing protein, expressed                                  |
| MDC004097.230:10956-11698 | AT2G44360.1 |                         |            |         |           |        |                                                                                                |
| MDC004168.448:5563-5714   | AT2G17990.1 |                         |            |         |           |        |                                                                                                |
| MDC004176.297:3407-3797   | AT1G07440.2 | PF00106                 | PTHRR19410 | KOG0725 |           |        | calcium-dependent protein kinase CPK1 adapter protein 2, putative, expressed                   |
| MDC004279.272:6053-6248   | AT1G07440.2 | PF00106                 | PTHRR19410 | KOG0725 |           |        | oxidoreductase, short chain dehydrogenase/reductase family protein, putative, expressed        |
| MDC004279.407:7341-7593   | AT2G29320.1 | PF00106                 | PTHRR19410 | KOG0725 | 1.1.1.206 | K08081 | oxidoreductase, short chain dehydrogenase/reductase family protein, putative, expressed        |
| MDC004279.407:8692-9013   | AT5G48960.1 | PF05761                 | PTHRR12103 | KOG2469 |           |        | 5-nucleotidase domain-containing protein, putative, expressed                                  |
| MDC004302.250:3053-3502   | AT3G48140.1 | PF06522                 |            |         |           |        | B12D protein, putative, expressed                                                              |
| MDC000479.396:652-1113    | AT5G18150.1 |                         | PTHRR12133 |         |           |        | expressed protein                                                                              |
| MDC004356.237:6421-6708   | AT5G18150.1 |                         | PTHRR12133 |         |           |        | expressed protein                                                                              |
| MDC004356.237:6808-6910   | AT5G59970.1 | PF00125                 | PTHRR10484 | KOG3467 |           | K11254 | Core histone H2A/H2B/H3/H4 domain containing protein, putative, expressed                      |
| MDC004389.393:4277-4752   | AT5G04500.1 | PF09258                 | PTHRR11062 | KOG1022 |           |        | exostosin, putative, expressed                                                                 |
| MDC004425.303:2507-3293   | AT2G46150.1 | PF03168                 |            |         |           |        | harpin-induced protein 1 domain containing protein, expressed                                  |
| MDC004475.200:4627-5729   | AT3G12870.1 |                         |            |         |           |        | expressed protein                                                                              |
| MDC004559.262:978-1347    | AT3G25940.1 | PF01096                 | PTHRR11239 | KOG2907 | 2.7.7.6   | K03000 | DNA-directed RNA polymerase I subunit RPA12, putative, expressed                               |
| MDC004588.262:3095-3346   | AT5G53070.1 | PF01281                 | PTHRR21368 | KOG4607 |           |        | ribosomal L9, putative, expressed                                                              |
| MDC004652.210:27146-27473 | AT1G11910.1 | PF00026,PF03489,PF05184 | PTHRR13683 | KOG1339 | 3.4.23.40 | K08245 | aspartic proteinase oryzasin-1 precursor, putative, expressed                                  |
| MDC004719.334:33353-33870 | AT1G11910.1 | PF00026,PF03489,PF05184 | PTHRR13683 | KOG1339 | 3.4.23.40 | K08245 | aspartic proteinase oryzasin-1 precursor, putative, expressed                                  |
| MDC004719.334:35584-35741 | AT1G02070.1 |                         |            |         |           |        | zinc finger protein, putative, expressed                                                       |
| MDC004742.548:8028-8154   | AT3G18215.1 | PF04654                 |            |         |           |        | expressed protein                                                                              |
| MDC004763.566:3821-4013   | AT5G18790.1 | PF00471                 |            |         |           |        | 50S ribosomal protein L33, putative, expressed                                                 |
| MDC004790.466:18774-19119 | AT1G05960.2 |                         | PTHRR12444 | KOG3505 |           |        | cyclin-related protein, putative, expressed                                                    |
| MDC004812.214:10140-10649 | AT2G46590.2 | PF02701                 |            |         |           |        | doz zinc finger domain containing protein, putative, expressed                                 |
| MDC004894.273:6281-6551   | AT4G30380.1 | PF03330                 |            |         |           |        | beta-expansin precursor, putative, expressed                                                   |
| MDC004903.290:28-253      | AT4G35783.1 | PF08137                 |            |         |           |        | conserved hypothetical protein                                                                 |
| MDC005044.363:2733-3247   | AT4G25260.1 | PF04043                 |            |         |           |        | invertase/pectin methylesterase inhibitor family protein, putative, expressed                  |
| MDC005053.110:4914-5359   | AT5G62360.1 | PF04043                 |            |         |           |        | invertase/pectin methylesterase inhibitor family protein, putative, expressed                  |
| MDC005053.110:5464-5590   | AT4G23100.3 | PF04107                 |            |         | 6.3.2.2   | K01919 | glutamate--cysteine ligase, chloroplast precursor, putative, expressed                         |
| MDC005075.307:3581-3994   | AT2G29590.1 | PF03061                 | PTHRR21660 | KOG3328 |           |        | thioesterase family protein, putative, expressed                                               |



|                           |             |                                         |               |         |                 |        |                                                                                                                     |
|---------------------------|-------------|-----------------------------------------|---------------|---------|-----------------|--------|---------------------------------------------------------------------------------------------------------------------|
| MDC005094.389:2512-3049   | AT2G06990.1 | PF00270,PF00271,PF08148                 | PTH11752      | KOG0948 |                 |        | DSHCT domain containing protein, expressed                                                                          |
| MDC005141.258:7613-7859   | AT5G49810.1 |                                         | PTH11751      | KOG0257 | 2.1.1.12        | K08247 | methionine S-methyltransferase, putative, expressed                                                                 |
| MDC005190.583:11765-12203 | AT5G20170.1 |                                         |               |         |                 |        | expressed protein                                                                                                   |
| MDC005190.586:28693-29117 | AT3G06170.1 | PF03348                                 | PTH110383     | KOG2592 |                 |        | TMS membrane protein/tumour differentially expressed protein, putative, expressed                                   |
| MDC005242.172:12540-13598 | AT5G66930.3 | PF07855                                 | PTH113292     | KOG4493 |                 |        | expressed protein                                                                                                   |
| MDC005257.231:6275-6378   | AT5G53370.1 | PF04043,PF01095                         | PTH122931.SF5 |         |                 |        | pectinesterase, putative, expressed                                                                                 |
| MDC005334.309:40809-41221 | AT1G17020.1 | PF03171                                 | PTH110209     | KOG0143 |                 |        | naringenin, 2-oxoglutarate 3-dioxygenase, putative, expressed                                                       |
| MDC000612.338:24965-25404 | AT4G17190.1 | PF00348                                 | PTH11525      | KOG0711 | 2.5.1.1,2.5.1.1 | K00787 | polyprenyl synthetase, putative, expressed                                                                          |
| MDC005353.186:3030-3296   | AT1G34750.1 | PF00481                                 | PTH113832     | KOG0698 |                 |        | protein phosphatase 2C, putative, expressed                                                                         |
| MDC005367.75:16852-17121  | AT1G22280.3 | PF00481                                 | PTH113832     | KOG0698 |                 |        | protein phosphatase 2C, putative, expressed                                                                         |
| MDC005367.75:17253-17433  | AT1G61070.1 | PF07333,PF00304                         |               |         |                 |        | DEF8 - Defensin and Defensin-like DEFL family, expressed                                                            |
| MDC005456.101:32525-33076 | AT3G14630.1 | PF00067                                 | PTH119383     | KOG0157 |                 |        | cytochrome P450 72A1, putative, expressed                                                                           |
| MDC005483.475:1862-2359   | AT3G14630.1 | PF00067                                 | PTH119383     | KOG0157 |                 |        | cytochrome P450 72A1, putative, expressed                                                                           |
| MDC005483.475:2519-2878   | AT5G56170.1 |                                         |               |         |                 |        | GPI-anchored protein, putative, expressed                                                                           |
| MDC005607.185:3202-3687   | AT4G30790.1 | PF10377                                 | PTH113222     |         |                 |        | expressed protein                                                                                                   |
| MDC000651.338:6690-7035   | AT3G03520.1 | PF04185                                 |               |         | 3.1.4.3         | K01114 | phosphoesterase family protein, putative, expressed                                                                 |
| MDC005623.471:5146-5546   | AT1G13440.2 | PF00044,PF02800                         | PTH110836     | KOG0657 | 1.2.1.12        | K00134 | glyceraldehyde-3-phosphate dehydrogenase, putative, expressed                                                       |
| MDC005648.396:4843-5646   | AT5G64610.1 | PF11717,PF00385,PF01853                 | PTH110615     | KOG2747 | 2.3.1.48        | K11308 | MYST-like histone acetyltransferase 1, putative, expressed                                                          |
| MDC005683.152:7464-7625   | AT1G21630.1 | PF00036                                 | PTH111216     | KOG0998 |                 |        | EF hand family protein, putative, expressed                                                                         |
| MDC005717.683:79-577      | AT1G05170.2 | PF01762                                 | PTH111214     | KOG2288 |                 |        | galactosyltransferase, putative, expressed                                                                          |
| MDC005782.166:27529-28337 | AT5G15790.2 | PF00097                                 | PTH122766     |         |                 |        | zinc finger, C3HC4 type domain containing protein, expressed                                                        |
| MDC005795.287:6123-6431   | AT2G39500.1 |                                         |               |         |                 |        |                                                                                                                     |
| MDC005856.445:7345-7621   | AT5G51190.1 | PF00847                                 |               |         |                 |        | AP2 domain containing protein, expressed                                                                            |
| MDC005866.401:35521-36684 | AT3G12360.1 | PF00023                                 | PTH118958     | KOG4412 |                 |        | ankyrin repeat-containing protein, putative, expressed                                                              |
| MDC005950.209:1841-2991   | AT3G12360.1 | PF00023                                 | PTH118958     | KOG4412 |                 |        | ankyrin repeat-containing protein, putative, expressed                                                              |
| MDC005950.237:13639-14704 | AT1G22070.1 | PF00170,PF07716                         |               |         |                 | K14431 | transcription factor, putative, expressed                                                                           |
| MDC006667.347:25394-25851 | AT3G49590.3 | PF10033                                 |               | KOG4573 |                 |        | expressed protein                                                                                                   |
| MDC006166.69:22399-22979  | AT1G71865.1 |                                         |               |         |                 |        | expressed protein                                                                                                   |
| MDC006167.203:6785-7413   | AT5G51280.1 | PF00270,PF00271,PF00098                 | PTH110967     | KOG0341 | 3.6.4.13        | K13116 | DEAD-box ATP-dependent RNA helicase 35A, putative, expressed                                                        |
| MDC006191.181:59671-60011 | AT1G19130.1 | PF06172                                 |               |         |                 | K09705 | cupin superfamily protein, putative, expressed                                                                      |
| MDC006200.189:255-378     | AT1G19130.1 | PF06172                                 |               |         |                 | K09705 | cupin superfamily protein, putative, expressed                                                                      |
| MDC006200.189:719-977     | AT3G61770.1 | PF02681                                 |               |         |                 |        | Divergent PAP2 family domain containing protein, expressed                                                          |
| MDC006204.278:5342-5722   | AT1G33055.1 |                                         |               |         |                 |        | expressed protein                                                                                                   |
| MDC006212.350:19119-19764 | AT1G05810.1 | PF00071,PF08477                         | PTH11708      | KOG0087 |                 | K07976 | ras-related protein, putative, expressed                                                                            |
| MDC006231.909:29746-30018 | AT3G28050.1 | PF00892                                 |               |         |                 |        | auxin-induced protein 5NG4, putative, expressed                                                                     |
| MDC006246.466:8563-8734   | AT1G23440.1 |                                         | PTH123402     | KOG4755 |                 |        | pyrrolidone-carboxylate peptidase, putative, expressed                                                              |
| MDC006260.462:6583-6877   | AT2G45960.3 | PF00230                                 | PTH119139     | KOG0223 |                 | K09872 | aquaporin protein, putative, expressed                                                                              |
| MDC006289.408:8288-8577   | AT4G00430.1 | PF00230                                 | PTH119139     | KOG0223 |                 | K09872 | aquaporin protein, putative, expressed                                                                              |
| MDC006289.408:9216-9268   | AT4G27750.1 |                                         |               |         |                 |        | impaired sucrose induction 1, putative, expressed                                                                   |
| MDC006289.410:4115-4432   | AT2G37750.1 |                                         |               |         |                 |        |                                                                                                                     |
| MDC006340.216:19210-20061 | AT1G26670.1 | PF05008,PF12352                         | PTH121230     | KOG1666 |                 | K08493 | vesicle transport v-SNARE protein, putative, expressed                                                              |
| MDC006363.247:28792-29092 | AT5G49525.1 |                                         |               |         |                 |        | expressed protein                                                                                                   |
| MDC006424.194:9322-9729   | AT1G67620.1 | PF02410                                 | PTH121043     | KOG3212 |                 |        | expressed protein                                                                                                   |
| MDC006471.130:167-359     | AT4G14103.2 | PF00646,PF07723                         |               |         |                 |        | OsFBL3 - F-box domain and LRR containing protein, expressed                                                         |
| MDC006517.413:12768-13371 | AT1G65000.1 |                                         |               |         |                 |        | expressed protein                                                                                                   |
| MDC006520.239:5991-6735   | AT2G31085.1 |                                         |               |         |                 |        |                                                                                                                     |
| MDC006520.258:40616-41227 | AT2G26740.1 | PF12146,PF00561                         | PTH110992     | KOG4178 |                 |        | hydrolase, alpha/beta fold family domain containing protein, expressed                                              |
| MDC006603.356:888-1307    | AT3G04180.1 | PF00190,PF07883                         |               |         |                 |        | Cupin domain containing protein, expressed                                                                          |
| MDC006603.734:7137-7471   | AT1G67830.1 | PF00657                                 |               |         |                 |        | GDSL-like lipase/acylhydrolase, putative, expressed                                                                 |
| MDC006603.753:648-986     | AT5G59960.1 |                                         |               |         |                 |        | expressed protein                                                                                                   |
| MDC006624.226:615-886     | AT5G59970.1 | PF00125                                 | PTH110484     | KOG3467 |                 | K11254 | Core histone H2A/H2B/H3/H4 domain containing protein, putative, expressed                                           |
| MDC006624.226:6675-7194   | AT3G19760.1 | PF00270,PF00271                         | PTH110967     | KOG0328 | 3.6.4.13        | K13025 | DEAD-box ATP-dependent RNA helicase, putative, expressed                                                            |
| MDC006639.149:9374-9510   | AT3G19760.1 | PF00270,PF00271                         | PTH110967     | KOG0328 | 3.6.4.13        | K13025 | DEAD-box ATP-dependent RNA helicase, putative, expressed                                                            |
| MDC006639.149:10169-10560 | AT3G13530.1 | PF00069,PF07714,PF00514,PF02985         | PTH122986     | KOG0198 |                 |        | STE_MEKK_ste11_MAP3K.1 - STE kinases include homologs to sterile 7, sterile 11 and sterile 20 from yeast, expressed |
| MDC006639.149:10658-11039 | AT4G17560.1 | PF01245                                 | PTH115680     | KOG1698 |                 |        | 50S ribosomal protein L19, chloroplast precursor, putative, expressed                                               |
| MDC006675.305:292-384     | AT5G47190.1 | PF01245                                 | PTH115680     | KOG1698 |                 |        | 50S ribosomal protein L19, chloroplast precursor, putative, expressed                                               |
| MDC006675.305:1240-1535   | AT3G54820.1 | PF00230                                 | PTH119139     | KOG0223 |                 | K09872 | aquaporin protein, putative, expressed                                                                              |
| MDC006710.363:6328-6707   | AT3G54820.1 | PF00230                                 | PTH119139     | KOG0223 |                 | K09872 | aquaporin protein, putative, expressed                                                                              |
| MDC006710.363:6868-6988   | AT2G37170.1 | PF00230                                 | PTH119139     | KOG0223 |                 | K09872 | aquaporin protein, putative, expressed                                                                              |
| MDC006710.363:8904-9171   | AT3G54820.1 | PF00230                                 | PTH119139     | KOG0223 |                 | K09872 | aquaporin protein, putative, expressed                                                                              |
| MDC006710.363:9415-9810   | AT5G09960.1 | PF05627                                 |               |         |                 |        | expressed protein                                                                                                   |
| MDC006772.187:518-757     | AT5G51190.1 | PF00847                                 |               |         |                 |        | AP2 domain containing protein, expressed                                                                            |
| MDC00706.497:11725-12685  | AT2G28840.2 | PF00023                                 | PTH118958     | KOG4214 |                 |        | ankyrin repeat domain-containing protein 28, putative, expressed                                                    |
| MDC006804.119:728-1335    | AT1G08230.2 | PF01490                                 | PTH122950     | KOG1303 |                 |        | transmembrane amino acid transporter protein, putative, expressed                                                   |
| MDC006834.195:5931-6204   | AT1G09900.1 | PF01535                                 | PTH110483     |         |                 |        | pentatricopeptide repeat domain containing protein, putative, expressed                                             |
| MDC007047.426:19297-19639 | AT5G47820.2 | PF00225                                 | PTH116012     | KOG0244 |                 | K10395 | kinesin motor domain containing protein, putative, expressed                                                        |
| MDC007057.148:1220-1518   | AT4G22570.1 | PF00156                                 |               | KOG1712 | 2.4.2.7         | K00759 | phosphoribosyl transferase, putative, expressed                                                                     |
| MDC007058.290:9956-10075  | AT5G16380.1 | PF04398                                 |               |         |                 |        | expressed protein                                                                                                   |
| MDC007066.597:3722-4200   | AT2G39970.1 | PF00153                                 |               |         |                 |        | mitochondrial carrier protein, putative, expressed                                                                  |
| MDC007117.619:30844-31444 | AT5G23070.1 | PF00265                                 | PTH111441     | KOG3125 | 2.7.1.21        | K00857 | thymidine kinase, putative, expressed                                                                               |
| MDC007192.252:1298-1688   | AT3G06980.1 | PF00270,PF00271                         | PTH110967     | KOG0331 |                 |        | DEAD-box ATP-dependent RNA helicase, putative, expressed                                                            |
| MDC007239.507:18593-18889 | AT1G74340.1 | PF07297                                 |               | KOG3488 |                 | K09658 | dolichol phosphate-mannose biosynthesis regulatory protein, putative, expressed                                     |
| MDC00741.237:17856-18144  | AT5G19140.2 | PF12481,PF12504                         | PTH11772      |         |                 |        | stem-specific protein TSJ11, putative, expressed                                                                    |
| MDC007283.1041:967-1726   | AT3G57080.1 | PF03871,PF01191                         | PTH110535     | KOG3218 |                 |        | DNA-directed RNA polymerases I, II, and III subunit RPABC1, putative, expressed                                     |
| MDC007283.917:10694-10994 | AT1G56070.1 | PF00009,PF01926,PF03144,PF03764,PF00679 | PTH123115     | KOG0469 | 3.6.5.3         | K03234 | elongation factor, putative, expressed                                                                              |
| MDC007289.107:9052-9887   | AT5G02490.1 | PF00012                                 | PTH119375     | KOG0109 |                 | K03283 | DnaK family protein, putative, expressed                                                                            |
| MDC007308.338:25153-25355 | AT5G35910.1 | PF01612,PF00570                         | PTH112124     | KOG2206 | 3.1.13.-        | K12591 | 3-5 exonuclease family protein, putative, expressed                                                                 |
| MDC007315.261:46384-46703 | AT5G61670.2 |                                         |               |         |                 |        | OR, putative, expressed                                                                                             |
| MDC007344.1025:7310-7666  | AT4G25620.1 |                                         |               |         |                 |        | expressed protein                                                                                                   |
| MDC00796.524:10939-12475  | AT4G09550.1 | PF12554                                 |               |         |                 |        | expressed protein                                                                                                   |

|                           |             |                                                         |           |         |           |        |                                                                                                                      |
|---------------------------|-------------|---------------------------------------------------------|-----------|---------|-----------|--------|----------------------------------------------------------------------------------------------------------------------|
| MDC007350.839:8348-8675   | AT2G28680.1 | PF00190                                                 |           |         |           |        | cupin domain containing protein, expressed                                                                           |
| MDC007376.494:17698-18125 | AT2G28680.1 | PF00190                                                 |           |         |           |        | cupin domain containing protein, expressed                                                                           |
| MDC007376.494:18463-18905 | AT1G07750.1 | PF00190                                                 |           |         |           |        | cupin domain containing protein, expressed                                                                           |
| MDC007376.494:18965-19412 | AT3G12700.1 |                                                         | PTHR13683 | KOG1339 |           |        | aspartyl protease family protein, putative, expressed                                                                |
| MDC007422.177:2747-3819   | AT3G12700.2 |                                                         | PTHR13683 |         |           |        | aspartyl protease family protein, putative, expressed                                                                |
| MDC007422.177:4802-5629   | AT5G11760.1 | PF08576                                                 |           |         |           |        | expressed protein                                                                                                    |
| MDC007454.249:3101-3502   | AT1G75620.1 | PF07250,PF09118                                         |           |         |           |        | glyoxal oxidase-related, putative, expressed                                                                         |
| MDC007469.326:38450-38743 | AT5G62000.4 | PF02362,PF06507,PF02309                                 |           |         |           |        | auxin response factor, putative, expressed                                                                           |
| MDC007485.683:834-1172    | AT2G43370.1 | PF00076                                                 | PTHR13952 | KOG0113 |           | K13155 | RNA recognition motif containing protein, putative, expressed                                                        |
| MDC007509.254:671-866     | AT5G41800.1 | PF01490                                                 | PTHR22950 | KOG1303 |           |        | transmembrane amino acid transporter protein, putative, expressed                                                    |
| MDC00812.292:23436-23602  | AT4G22720.2 | PF00814                                                 | PTHR11735 | KOG2708 | 3.4.24.57 | K01409 | O-sialoglycoprotein endopeptidase, putative, expressed                                                               |
| MDC007568.248:14938-15506 | AT4G22720.2 | PF00814                                                 | PTHR11735 | KOG2708 | 3.4.24.57 | K01409 | O-sialoglycoprotein endopeptidase, putative, expressed                                                               |
| MDC007568.248:16771-17120 | AT2G40470.1 | PF03195                                                 |           |         |           |        | DUF260 domain containing protein, putative, expressed                                                                |
| MDC007582.375:15700-16040 | AT4G19185.1 | PF00892                                                 |           |         |           |        | nodulin, putative, expressed                                                                                         |
| MDC007598.175:7142-7412   | AT4G19185.1 | PF00892                                                 |           |         |           |        | nodulin, putative, expressed                                                                                         |
| MDC007598.175:13744-13944 | AT1G31500.4 | PF03372                                                 | PTHR12121 | KOG0620 |           |        | endonuclease/exonuclease/phosphatase family domain containing protein, expressed                                     |
| MDC007614.448:8696-9035   | AT3G23600.2 | PF01738                                                 | PTHR17630 | KOG3043 |           |        | endo-1,3;1,4-beta-D-glucanase precursor, putative, expressed                                                         |
| MDC007624.239:4383-4761   | AT5G41800.1 | PF01490                                                 | PTHR22950 | KOG1303 |           |        | transmembrane amino acid transporter protein, putative, expressed                                                    |
| MDC00812.292:23731-24364  | AT2G01480.1 | PF10250                                                 |           |         |           |        | growth regulator related protein, putative                                                                           |
| MDC007641.311:4854-5781   | AT4G32300.1 | PF01453,PF00069,PF07714                                 | PTHR23258 | KOG1187 |           |        | lectin protein kinase family protein, putative, expressed                                                            |
| MDC007651.256:7095-7497   | AT2G18030.1 | PF01625                                                 | PTHR10173 | KOG1635 |           |        | peptide methionine sulfoxide reductase, putative, expressed                                                          |
| MDC007657.717:4681-5123   | AT5G42960.1 |                                                         |           |         |           |        | DANA2, putative, expressed                                                                                           |
| MDC007713.205:2812-3135   | AT4G13195.1 |                                                         |           |         |           |        |                                                                                                                      |
| MDC007725.313:21618-22339 | AT1G11170.1 | PF05212                                                 |           |         |           |        | lysine ketoglutarate reductase trans-splicing related 1, putative, expressed                                         |
| MDC007736.142:17091-17712 | AT4G30770.1 |                                                         |           |         |           |        | expressed protein                                                                                                    |
| MDC00813.771:2702-3359    | AT1G74530.3 |                                                         |           |         |           |        | expressed protein                                                                                                    |
| MDC007790.237:180-282     | AT2G02090.1 | PF00176,PF00271                                         | PTHR10799 | KOG0389 | 3.6.4.12  | K14439 | SNF2 family N-terminal domain containing protein, expressed                                                          |
| MDC007791.237:10017-10398 | AT1G76900.2 | PF00646,PF01167                                         | PTHR16517 | KOG2502 |           |        | OsFBT7 - F-box and tubby domain containing protein, expressed                                                        |
| MDC007792.401:10562-11508 | AT2G33730.1 | PF00270,PF00271                                         | PTHR10967 | KOG0333 | 3.6.4.13  | K12858 | DEAD-box ATP-dependent RNA helicase, putative, expressed                                                             |
| MDC007792.401:29323-29673 | AT4G08770.1 | PF00141                                                 |           |         | 1.1.1.1.7 | K00430 | peroxidase precursor, putative, expressed                                                                            |
| MDC007858.422:10539-10754 | AT5G05340.1 | PF00141                                                 |           |         | 1.1.1.1.7 | K00430 | peroxidase precursor, putative, expressed                                                                            |
| MDC007858.422:12370-12964 | AT2G47900.3 | PF00646,PF01167                                         | PTHR16517 | KOG2502 |           |        | OsFBT5 - F-box and tubby domain containing protein, expressed                                                        |
| MDC007953.177:16669-16974 | AT1G12410.1 | PF00574                                                 | PTHR10381 | KOG0840 | 3.4.21.92 | K01358 | OsCip9 - Putative Clp protease homologue, expressed                                                                  |
| MDC008045.226:5778-6105   | AT3G61430.2 | PF00230                                                 | PTHR19139 | KOG0223 |           | K09872 | aquaporin protein, putative, expressed                                                                               |
| MDC008099.122:14997-15532 | AT4G23400.1 | PF00230                                                 | PTHR19139 | KOG0223 |           | K09872 | aquaporin protein, putative, expressed                                                                               |
| MDC008099.122:15720-15853 | AT4G00300.2 | PF11721                                                 |           |         |           |        | receptor-like protein kinase At3g46290 precursor, putative, expressed                                                |
| MDC00814.336:7471-7949    | AT1G01620.2 | PF00230                                                 | PTHR19139 | KOG0223 |           | K09872 | aquaporin protein, putative, expressed                                                                               |
| MDC008099.122:15946-16282 | AT4G00430.1 | PF00230                                                 | PTHR19139 | KOG0223 |           | K09872 | aquaporin protein, putative, expressed                                                                               |
| MDC008099.122:16388-16809 | AT5G40240.2 | PF00892                                                 |           |         |           |        | auxin-induced protein 5NG4, putative, expressed                                                                      |
| MDC008104.97:4350-4465    | AT5G40230.1 | PF00892                                                 |           |         |           |        | auxin-induced protein 5NG4, putative, expressed                                                                      |
| MDC008104.97:4893-5080    | AT3G17490.1 | PF00646,PF07734                                         |           |         |           |        | OsFBX464 - F-box domain containing protein                                                                           |
| MDC008108.99:7464-9223    | AT2G34340.1 | PF04520                                                 |           |         |           |        | DUF584 domain containing protein, putative, expressed                                                                |
| MDC008119.473:1280-1805   | AT2G24100.1 |                                                         |           |         |           |        | expressed protein                                                                                                    |
| MDC008177.674:13219-13664 | AT4G12710.1 | PF00514                                                 | PTHR23316 | KOG4646 |           |        | armadillo/beta-catenin repeat family protein, putative, expressed                                                    |
| MDC008184.205:8772-9239   | AT1G54540.1 | PF03168                                                 |           |         |           |        | harpin-induced protein 1 domain containing protein, expressed                                                        |
| MDC008212.498:491-1195    | AT1G69410.1 | PF00467,PF01287                                         | PTHR11673 | KOG3271 |           | K03263 | eukaryotic translation initiation factor 5A, putative, expressed                                                     |
| MDC008233.164:1510-1669   | AT4G02420.1 | PF00139,PF00069,PF07714                                 | PTHR23258 | KOG1187 |           |        | receptor like protein kinase, putative, expressed                                                                    |
| MDC008313.318:4207-4571   | AT1G74530.3 |                                                         |           |         |           |        | expressed protein                                                                                                    |
| MDC008325.354:8874-8959   | AT5G17760.1 | PF00004                                                 | PTHR23070 | KOG0743 |           |        | mitochondrial chaperone BCS1, putative, expressed                                                                    |
| MDC008336.464:6231-7078   | AT4G28210.1 |                                                         |           |         |           |        |                                                                                                                      |
| MDC008345.348:4511-4874   | AT5G47470.1 | PF00892                                                 |           |         |           |        |                                                                                                                      |
| MDC008453.913:10123-10374 | AT4G21800.2 | PF03029                                                 | PTHR21231 | KOG1532 |           | K06883 | integral membrane protein DUF6 domain containing protein, expressed                                                  |
| MDC008485.183:6542-7083   | AT5G42965.1 |                                                         |           |         |           |        | ATP binding protein, putative, expressed                                                                             |
| MDC008496.393:3311-4214   | AT5G47180.2 | PF00635                                                 | PTHR10809 | KOG0439 |           |        | conserved hypothetical protein                                                                                       |
| MDC008501.186:4780-5080   | AT2G24100.1 |                                                         |           |         |           |        | MSP domain containing protein, expressed                                                                             |
| MDC008511.144:10693-11189 | AT4G10360.2 | PF03798                                                 | PTHR13439 | KOG4561 |           |        | expressed protein                                                                                                    |
| MDC008521.354:1690-2152   | AT1G06650.2 | PF03171                                                 | PTHR10209 | KOG0143 |           |        | transmembrane protein 56, putative, expressed                                                                        |
| MDC00835.215:2033-2459    | AT1G30970.2 |                                                         | PTHR23215 | KOG2893 |           |        | 1-aminocyclopropane-1-carboxylate oxidase homolog 2, putative, expressed                                             |
| MDC008558.180:2276-23209  | AT5G27770.1 | PF01776                                                 | PTHR10064 | KOG3434 |           | K02891 | ZOS9-19 - C2H2 zinc finger protein, expressed                                                                        |
| MDC008575.351:1527-1902   | AT5G27770.1 | PF01776                                                 | PTHR10064 | KOG3434 |           | K02891 | 60S ribosomal protein L22-2, putative, expressed                                                                     |
| MDC008575.351:2734-2941   | AT5G41330.1 | PF02214                                                 | PTHR11145 | KOG2714 |           |        | 60S ribosomal protein L22-2, putative, expressed                                                                     |
| MDC008579.487:3510-3869   | AT1G71950.1 | PF05922                                                 | PTHR10795 |         |           |        | B4-BT84 - Bric-a-Brac, Tramtrack, Broad Complex BTB domain with B4 subfamily conserved sequence, expressed           |
| MDC008657.482:3281-3527   | AT4G12020.3 | PF02671,PF03106,PF00931,PF07725,PF00560,PF00069,PF07714 | PTHR22986 | KOG0198 |           |        | subtilisin N-terminal Region family protein, expressed                                                               |
| MDC008801.230:1128-1609   | AT1G07510.1 | PF06480,PF00004,PF01434                                 | PTHR23076 | KOG0731 | 3.4.24.-  | K08956 | STE_MEKK_ste11_MAP3K.12 - STE kinases include homologs to sterile 7, sterile 11 and sterile 20 from yeast, expressed |
| MDC008815.152:3297-3548   | AT1G50670.1 | PF02338                                                 | PTHR13312 |         | 3.1.2.-   | K13719 | OsFtsH8 FtsH protease, homologue of AtFtsH3/10, expressed                                                            |
| MDC008844.652:13597-13959 | AT1G20430.1 |                                                         | PTHR21568 |         |           |        | OTU-like cysteine protease family protein, putative, expressed                                                       |
| MDC008880.141:64155-64719 | AT2G36985.1 | PF08137                                                 |           |         |           |        | expressed protein                                                                                                    |
| MDC008909.172:124-491     | AT1G20980.1 | PF03110                                                 |           |         |           |        | expressed protein                                                                                                    |
| MDC008927.255:16667-17470 | AT5G66780.1 |                                                         |           |         |           |        | OsSPL15 - SBP-box gene family member, expressed                                                                      |
| MDC008947.382:12415-12822 | AT1G30760.1 | PF01565,PF08031                                         | PTHR11748 |         |           |        | expressed protein                                                                                                    |
| MDC008945.305:5283-5857   | AT1G11910.1 | PF00026,PF03489,PF05184                                 | PTHR13683 | KOG1339 | 3.4.23.40 | K08245 | reticuline oxidase-like protein precursor, putative, expressed                                                       |
| MDC008968.446:15847-16400 | AT4G31750.1 | PF00481                                                 | PTHR13832 | KOG0698 |           |        | aspartic proteinase oryzasin-1 precursor, putative, expressed                                                        |
| MDC009079.262:4671-4942   | AT4G31750.1 | PF00481                                                 | PTHR13832 | KOG0698 |           |        | protein phosphatase 2C, putative, expressed                                                                          |
| MDC009079.262:6115-6244   | AT4G31750.1 | PF00481                                                 | PTHR13832 | KOG0698 |           |        | protein phosphatase 2C, putative, expressed                                                                          |
| MDC009079.262:7239-7401   | AT1G25510.1 |                                                         | PTHR13683 | KOG1339 |           |        | protein phosphatase 2C, putative, expressed                                                                          |
| MDC00851.382:15529-16034  | AT5G40230.1 | PF00892                                                 |           |         |           |        | aspartic proteinase, putative, expressed                                                                             |
| MDC009088.260:67-301      | AT3G28050.1 | PF00892                                                 |           |         |           |        | auxin-induced protein 5NG4, putative, expressed                                                                      |
| MDC009088.260:680-830     | AT3G28050.1 | PF00892                                                 |           |         |           |        | auxin-induced protein 5NG4, putative, expressed                                                                      |
| MDC009088.260:987-1845    | AT4G37270.1 | PF00122,PF00702                                         | PTHR11939 | KOG0207 |           |        | auxin-induced protein 5NG4, putative, expressed                                                                      |
| MDC009100.743:18942-19318 | AT5G58950.1 | PF07714,PF00069                                         | PTHR23257 | KOG0192 |           |        | cadmium/zinc-transporting ATPase, putative, expressed                                                                |
|                           |             |                                                         |           |         |           |        | protein kinase domain containing protein, expressed                                                                  |

|                            |             |                                         |  |                |         |                |                                                                                             |
|----------------------------|-------------|-----------------------------------------|--|----------------|---------|----------------|---------------------------------------------------------------------------------------------|
| MDC009128.602:32330-32740  | AT2G23090.1 | PF04419                                 |  |                |         |                | expressed protein                                                                           |
| MDC009154.309:1280-1387    | AT3G60210.1 | PF00166                                 |  | PTHR10772      | KOG1641 |                | chaperonin, putative, expressed                                                             |
| MDC009197.269:132-321      | AT1G24260.3 | PF00319,PF01486                         |  | PTHR11945      | KOG0014 |                | OsMADS7 - MADS-box family gene with MlKcC type-box, expressed                               |
| MDC009276.331:6201-6936    | AT1G58120.1 |                                         |  |                |         |                | CPUORF38 - conserved peptide uORF-containing transcript, expressed                          |
| MDC009282.275:3906-4729    | AT1G16900.1 | PF03901                                 |  | PTHR22760      | KOG2515 | 2.4.1.-        | Alg9-like mannosyltransferase protein, putative, expressed                                  |
| MDC009291.126:1104-1457    | AT5G59970.1 | PF00125                                 |  | PTHR10484      | KOG3467 |                | Core histone H2A/H2B/H3/H4 domain containing protein, putative, expressed                   |
| MDC009303.382:1557-1878    | AT1G51060.1 | PF00125,PF00808                         |  | PTHR23430      | KOG1756 |                | core histone H2A/H2B/H3/H4, putative, expressed                                             |
| MDC00876.364:2401-2783     | AT5G38200.1 | PF07722                                 |  |                |         |                |                                                                                             |
| MDC009325.280:310-749      | AT2G39730.1 | PF00004                                 |  |                | KOG0651 |                | AAA-type ATPase family protein, putative, expressed                                         |
| MDC009368.188:2702-3008    | AT5G36930.2 | PF01582,PF00560,PF00931,PF07725         |  | PTHR23155      | KOG4658 |                | disease resistance protein RGA3, putative, expressed                                        |
| MDC009423.544:1637-2373    | AT2G17420.1 | PF07992,PF00070                         |  | PTHR22912      | KOG0404 | 1.8.1.9        | thioredoxin reductase 2, putative, expressed                                                |
| MDC009436.50:32007-32411   | AT3G45140.1 | PF01477,PF00305                         |  | PTHR11771      |         | 1.13.11.12     | lipoygenase, putative, expressed                                                            |
| MDC009458.215:14228-14402  | AT5G56670.1 | PF04758                                 |  | PTHR12650      | KOG0009 |                | expressed protein                                                                           |
| MDC009483.38:3322-3461     | AT5G47310.1 | PF05903                                 |  | PTHR12378      | KOG0324 |                | ethylene-responsive element-binding protein, putative, expressed                            |
| MDC009489.259:582-956      | AT5G47310.1 | PF05903                                 |  | PTHR12378      | KOG0324 |                | ethylene-responsive element-binding protein, putative, expressed                            |
| MDC009489.259:2379-2689    | AT5G47310.1 | PF05903                                 |  | PTHR12378      | KOG0324 |                | ethylene-responsive element-binding protein, putative, expressed                            |
| MDC009489.375:2207-2531    | AT2G23570.1 |                                         |  |                |         |                | OsPOP4 - Putative Prolyl Oligopeptidase homologue, expressed                                |
| MDC009490.558:6365-6741    | AT2G31600.1 |                                         |  |                |         |                | expressed protein                                                                           |
| MDC009501.247:2219-2729    | AT4G16143.2 | PF01749,PF00514,PF02985,PF03130         |  | PTHR23316      | KOG0166 |                | importin subunit alpha, putative, expressed                                                 |
| MDC009595.146:45-416       | AT3G14430.1 |                                         |  |                |         |                | expressed protein                                                                           |
| MDC009596.264:70-344       | AT2G20290.1 | PF02736,PF00063,PF00612,PF01843         |  | PTHR13140      | KOG0160 |                | myosin, putative, expressed                                                                 |
| MDC009602.113:10106-10498  | AT1G71950.1 | PF05922                                 |  | PTHR10795      |         |                | subtilisin N-terminal Region family protein, expressed                                      |
| MDC009615.292:631-756      | AT4G38790.1 | PF00810                                 |  | PTHR10585      | KOG3106 |                | ER lumen protein retaining receptor, putative, expressed                                    |
| MDC009626.195:1302-1624    | AT5G41760.2 | PF04142                                 |  | PTHR10231      | KOG2234 |                | UAA transporter family domain containing protein, expressed                                 |
| MDC000140.134:54551-54847  | AT5G10180.1 | PF00916,PF01740                         |  | PTHR11814      | KOG0236 |                | sulfate transporter, putative, expressed                                                    |
| MDC009685.334:6702-7096    | AT1G75460.1 | PF02190                                 |  | PTHR23327      | KOG4159 |                | ATP-dependent protease, putative, expressed                                                 |
| MDC009708.152:51041-51699  | AT5G40150.1 | PF00141                                 |  |                |         | 1.1.1.7        | peroxidase family protein, expressed                                                        |
| MDC000908.450:4034-4471    | AT3G04730.1 | PF02309                                 |  |                |         |                | OsIAA30 - Auxin-responsive Aux/IAA gene family member, expressed                            |
| MDC009814.418:6273-6657    | AT4G17690.1 | PF00141                                 |  |                |         | 1.1.1.7        | peroxidase family protein, expressed                                                        |
| MDC000908.450:4523-5057    | AT4G14550.1 | PF02309                                 |  |                |         |                | OsIAA30 - Auxin-responsive Aux/IAA gene family member, expressed                            |
| MDC009814.418:7581-7800    | AT3G28430.1 | PF09758                                 |  | PTHR21481      | KOG2219 |                | expressed protein                                                                           |
| MDC009830.368:4257-4492    | AT5G65780.1 | PF01063                                 |  | PTHR11825      | KOG0975 | 2.6.1.42       | aminotransferase domain containing protein, putative, expressed                             |
| MDC009850.21:558-987       | AT1G19580.1 | PF00132                                 |  | PTHR22572      | KOG4042 |                | bacterial transferase hexapeptide domain containing protein, expressed                      |
| MDC009856.139:35298-35913  | AT1G06990.1 | PF00657                                 |  | PTHR22835,SF27 |         |                | GDSL-like lipase/acetylhydrolase, putative, expressed                                       |
| MDC009859.245:7701-7947    | AT1G16180.2 | PF03348                                 |  | PTHR10383      | KOG2592 |                | TMS membrane protein/tumour differentially expressed protein, putative, expressed           |
| MDC009907.294:23684-23868  | AT1G16180.2 | PF03348                                 |  | PTHR10383      | KOG2592 |                | TMS membrane protein/tumour differentially expressed protein, putative, expressed           |
| MDC009907.294:24320-24561  | AT1G16180.2 | PF03348                                 |  | PTHR10383      | KOG2592 |                | TMS membrane protein/tumour differentially expressed protein, putative, expressed           |
| MDC009907.294:24876-25099  | AT4G34700.1 | PF05347                                 |  | PTHR12868      | KOG3466 | 1.6.5.3,1.6.99 | Lyr motif containing protein, putative, expressed                                           |
| MDC009946.417:4427-4703    | AT5G37600.1 | PF03951,PF00120                         |  | PTHR20852      | KOG0683 | 6.3.1.2        | glutamine synthetase, catalytic domain containing protein, expressed                        |
| MDC009950.283:2248-2601    | AT1G66200.3 | PF03951,PF00120                         |  | PTHR20852      | KOG0683 |                | glutamine synthetase, catalytic domain containing protein, expressed                        |
| MDC009950.283:3474-3584    | AT5G37600.1 | PF03951,PF00120                         |  | PTHR20852      | KOG0683 | 6.3.1.2        | glutamine synthetase, catalytic domain containing protein, expressed                        |
| MDC009950.283:3884-4023    | AT5G37600.1 | PF03951,PF00120                         |  | PTHR20852      | KOG0683 | 6.3.1.2        | glutamine synthetase, catalytic domain containing protein, expressed                        |
| MDC009950.283:4266-4401    | AT5G16570.1 | PF03951,PF00120                         |  | PTHR20852      | KOG0683 | 6.3.1.2        | glutamine synthetase, catalytic domain containing protein, expressed                        |
| MDC009950.288:5596-6266    | AT5G32470.1 | PF03070                                 |  | PTHR20858      |         |                | TENA/THI-4 family protein, putative, expressed                                              |
| MDC009976.359:12472-13055  | AT5G32470.1 | PF03070                                 |  | PTHR20858      |         |                | TENA/THI-4 family protein, putative, expressed                                              |
| MDC009976.359:13136-13571  | AT2G36070.1 | PF04280                                 |  | PTHR10721      | KOG2580 |                | tim44-like domain containing protein, expressed                                             |
| MDC009991.166:1671-1911    | AT4G23160.1 | PF07727,PF01657,PF00069,PF07714,PF11883 |  | PTHR11439      | KOG1187 |                | TKL_IRAK_DUF26-1c.20 - DUF26 kinases have homology to DUF26 containing loci, expressed      |
| MDC009992.373:5233-5529    | AT5G02230.2 | PF00702                                 |  | PTHR18901      | KOG3109 |                | haloacid dehalogenase-like hydrolase family protein, putative, expressed                    |
| MDC010058.303:36260-36547  | AT5G41800.1 | PF01490                                 |  | PTHR22950      | KOG1303 |                | transmembrane amino acid transporter protein, putative, expressed                           |
| MDC010065.349:3326-3668    | AT2G22640.1 |                                         |  |                |         |                | BRICK1, putative, expressed                                                                 |
| MDC010071.397:392-525      | AT1G56700.3 |                                         |  | PTHR23402      | KOG4755 |                | pyrrolidone-carboxylate peptidase, putative, expressed                                      |
| MDC000997.260:16008-16410  | AT4G16450.2 |                                         |  |                |         |                | expressed protein                                                                           |
| MDC010085.172:13-504       | AT3G10050.1 | PF00291,PF00585                         |  | PTHR10314      | KOG1250 | 4.3.1.19       | threonine dehydratase biosynthetic, chloroplast precursor, putative, expressed              |
| MDC010099.229:4737-5125    | AT5G06700.1 | PF03005                                 |  |                |         |                | leaf senescence related protein, putative, expressed                                        |
| MDC010104.1012:30864-31577 | AT2G32000.2 | PF01751,PF01131                         |  | PTHR11390      | KOG1957 | 5.99.1.2       | DNA topoisomerase 3 protein, putative, expressed                                            |
| MDC010172.365:23895-24342  | AT2G37170.1 | PF00230                                 |  | PTHR19139      | KOG0223 |                | aquaporin protein, putative, expressed                                                      |
| MDC010185.231:6884-7177    | AT1G56700.3 |                                         |  | PTHR23402      | KOG4755 |                | pyrrolidone-carboxylate peptidase, putative, expressed                                      |
| MDC000997.260:17123-17228  | AT3G50590.1 | PF00400                                 |  | PTHR12816      |         |                | WD domain, G-beta repeat domain containing protein, expressed                               |
| MDC010186.403:23504-23954  | AT5G26800.1 | PF09597                                 |  |                |         |                | expressed protein                                                                           |
| MDC010192.333:5522-5655    | AT3G12360.1 | PF00023                                 |  | PTHR18958      | KOG4412 |                | ankyrin repeat-containing protein, putative, expressed                                      |
| MDC010192.348:12503-13571  | AT5G62790.2 | PF02670,PF08436                         |  |                |         | 1.1.1.267      | 1-deoxy-D-xylulose 5-phosphate reductoisomerase, chloroplast precursor, putative, expressed |
| MDC010200.476:4261-4691    | AT5G62790.2 | PF02670,PF08436                         |  |                |         | 1.1.1.267      | 1-deoxy-D-xylulose 5-phosphate reductoisomerase, chloroplast precursor, putative, expressed |
| MDC010200.476:4901-5052    | AT5G51970.2 | PF08240,PF00107                         |  |                |         | 1.1.1.14       | dehydrogenase, putative, expressed                                                          |
| MDC010241.223:17213-18085  | AT1G23440.1 |                                         |  | PTHR11695      | KOG0024 |                | pyrrolidone-carboxylate peptidase, putative, expressed                                      |
| MDC000997.260:17440-17768  | AT5G40350.1 | PF00249                                 |  | PTHR10641      | KOG0048 |                | MYB family transcription factor, putative                                                   |
| MDC010252.317:1021-1375    | AT5G64360.4 | PF00226                                 |  | PTHR11821      |         |                | heat shock protein DnaJ, putative, expressed                                                |
| MDC010254.244:14459-14910  | AT3G56150.2 | PF05470,PF01399                         |  | PTHR13937      | KOG1076 |                | eukaryotic translation initiation factor 3 subunit C, putative, expressed                   |
| MDC010268.425:12245-12627  | AT3G42860.1 | PF06839,PF00098                         |  | PTHR23002      | KOG4400 |                | GRF zinc finger family protein, expressed                                                   |
| MDC010300.238:15044-16078  | AT3G55640.1 | PF00153                                 |  | PTHR11896      | KOG0752 |                | mitochondrial carrier protein, putative, expressed                                          |
| MDC010318.100:9492-9884    | AT3G19080.1 | PF08766,PF02201                         |  | PTHR13844      | KOG1946 |                | upstream activation factor subunit spp27, putative, expressed                               |
| MDC010319.227:8072-8321    | AT1G49820.1 | PF01636                                 |  |                |         |                | methylthioribose kinase, putative, expressed                                                |
| MDC010325.233:4683-4903    | AT1G48300.1 |                                         |  |                |         |                | expressed protein                                                                           |
| MDC010328.213:18449-19160  | AT1G62290.2 | PF00026,PF03489,PF05184                 |  | PTHR13683      | KOG1339 | 3.4.23.40      | aspartic proteinase oryzasin-1 precursor, putative, expressed                               |
| MDC010328.215:28204-28446  | AT3G46890.1 |                                         |  |                |         |                | expressed protein                                                                           |
| MDC010431.261:2731-2961    | AT2G19080.1 |                                         |  | PTHR12289      | KOG3028 |                | expressed protein                                                                           |
| MDC010441.401:17991-18191  | AT5G49525.1 |                                         |  |                |         |                | expressed protein                                                                           |
| MDC010450.908:6750-7226    | AT1G08530.1 |                                         |  |                |         |                | expressed protein                                                                           |
| MDC010450.949:3543-4321    | AT5G45970.1 | PF00071,PF08477                         |  | PTHR11708      | KOG0393 |                | ras-related protein, putative, expressed                                                    |
| MDC001007.507:15632-16109  | AT2G02130.1 | PF07333,PF00304                         |  |                |         |                | DEF8 - Defensin and Defensin-like DEFL family, expressed                                    |
| MDC010466.196:24-204       | AT5G56170.1 |                                         |  |                |         |                | GPI-anchored protein, putative, expressed                                                   |

|                           |             |                         |           |         |           |        |                                                                        |
|---------------------------|-------------|-------------------------|-----------|---------|-----------|--------|------------------------------------------------------------------------|
| MDC010492.245:666-1340    | AT5G36110.1 | PF00067                 | PTHR19383 | KOG0157 |           |        | cytochrome P450, putative, expressed                                   |
| MDC010598.348:9370-9523   | AT1G32340.1 | PF05773,PF00097,PF01485 | PTHR11685 | KOG1814 | 6.3.2.19  | K11971 | ara54-like RING finger protein, putative, expressed                    |
| MDC010640.116:5178-5493   | AT4G12760.1 |                         |           |         |           |        | expressed protein                                                      |
| MDC010687.251:5882-6163   | AT4G21810.1 | PF04511                 | PTHR11009 | KOG0858 |           |        | Der1-like family domain containing protein, expressed                  |
| MDC010697.307:4965-5070   | AT4G35790.1 | PF00168,PF00614,PF12357 | PTHR18896 | KOG1329 |           |        | phospholipase D, putative, expressed                                   |
| MDC010709.414:585-1037    | AT1G02090.3 | PF01399                 | PTHR15350 | KOG3250 |           | K12180 | proteasome subunit, putative, expressed                                |
| MDC010751.335:5076-5282   | AT5G27870.1 | PF04043,PF01095,PF04886 |           |         |           |        | pectinesterase, putative, expressed                                    |
| MDC010779.408:15723-16139 | AT3G61060.1 | PF00646                 |           |         |           |        | OsFBX391 - F-box domain containing protein, expressed                  |
| MDC010783.139:10332-11071 | AT3G61060.1 | PF00646                 |           |         |           |        | OsFBX391 - F-box domain containing protein, expressed                  |
| MDC010783.139:11498-12068 | AT1G49700.2 | PF09713                 |           |         |           |        | plant-specific domain TIGR01589 family protein, putative, expressed    |
| MDC010817.271:27525-27737 | AT3G15360.1 | PF00085                 | PTHR10438 | KOG0910 |           |        | thioredoxin, putative, expressed                                       |
| MDC010842.294:4654-4752   | AT1G15520.1 | PF00005,PF01061,PF08370 | PTHR19241 | KOG0065 |           |        | pleiotropic drug resistance protein, putative, expressed               |
| MDC010937.194:12046-12338 | AT5G66900.1 | PF05659,PF00931,PF00560 | PTHR23155 | KOG4658 |           |        | disease resistance protein, putative, expressed                        |
| MDC010969.378:7112-8073   | AT3G51430.2 | PF03088                 | PTHR10426 | KOG1520 |           |        | strictosidine synthase, putative, expressed                            |
| MDC001040.307:555-1041    | AT4G14960.2 | PF00091,PF03953         | PTHR11588 | KOG1376 |           | K07374 | tubulin/FtsZ domain containing protein, putative, expressed            |
| MDC001048.310:7356-8038   | AT3G15630.1 |                         |           |         |           |        | expressed protein                                                      |
| MDC011163.587:1351-1663   | AT3G51000.1 | PF12146,PF00561         | PTHR10992 | KOG4178 |           |        | hydrolase, alpha/beta fold family domain containing protein, expressed |
| MDC011167.337:32-262      | AT5G48100.1 | PF07732,PF00394,PF07731 | PTHR11709 | KOG1263 |           |        | laccase precursor protein, putative, expressed                         |
| MDC011283.393:3854-4077   | AT3G21610.2 | PF02681                 |           |         |           |        | Divergent PAP2 family domain containing protein, expressed             |
| MDC011325.298:41258-41415 | AT3G51240.1 | PF03171                 | PTHR10209 | KOG0143 | 1.14.11.9 | K00475 | naringenin,2-oxoglutarate 3-dioxygenase, putative, expressed           |
| MDC011373.244:3946-4433   | AT3G51240.2 | PF03171                 | PTHR10209 | KOG0143 | 1.14.11.9 | K00475 | naringenin,2-oxoglutarate 3-dioxygenase, putative, expressed           |
| MDC011373.244:4627-5027   | AT3G51240.2 | PF03171                 | PTHR10209 | KOG0143 | 1.14.11.9 | K00475 | naringenin,2-oxoglutarate 3-dioxygenase, putative, expressed           |
| MDC011373.244:5822-6338   | AT4G09830.1 |                         |           |         |           |        | holocarboxylase synthetase, putative, expressed                        |
| MDC011377.138:14053-14246 | AT4G09830.1 |                         |           |         |           |        | holocarboxylase synthetase, putative, expressed                        |
| MDC011377.138:16729-17502 | AT1G22790.2 |                         |           |         |           |        | expressed protein                                                      |
| MDC011377.138:23384-24008 | AT1G34000.1 |                         |           |         |           |        | high light inducible protein, putative, expressed                      |
| MDC011377.138:30623-31125 | AT1G34000.1 |                         |           |         |           |        | high light inducible protein, putative, expressed                      |
| MDC011377.138:31736-32194 | AT1G72730.1 | PF00270,PF00271         | PTHR10967 | KOG0327 |           | K03257 | DEAD-box ATP-dependent RNA helicase, putative, expressed               |
| MDC011423.269:13482-14391 | AT1G54270.2 | PF00270,PF00271         | PTHR10967 | KOG0327 |           | K03257 | DEAD-box ATP-dependent RNA helicase, putative, expressed               |
| MDC011423.269:14495-14923 | AT5G20350.1 | PF00023,PF01529         | PTHR22883 | KOG0509 |           |        | palmitoyltransferase TIP1, putative, expressed                         |
| MDC011475.283:13870-14453 | AT1G69450.2 | PF02714                 | PTHR13018 | KOG1134 |           |        | DUF221 domain containing protein, expressed                            |
| MDC011493.183:13848-14159 | AT4G23330.2 |                         |           |         |           |        |                                                                        |
